# Supplementary material for: RNF112-mediated FOXM1 ubiquitination suppresses the proliferation and invasion of gastric cancer
Source: PubMed Central journal article supplement (PMC10259508; doi:10.1172/jci.insight.166698), 2023-06-08

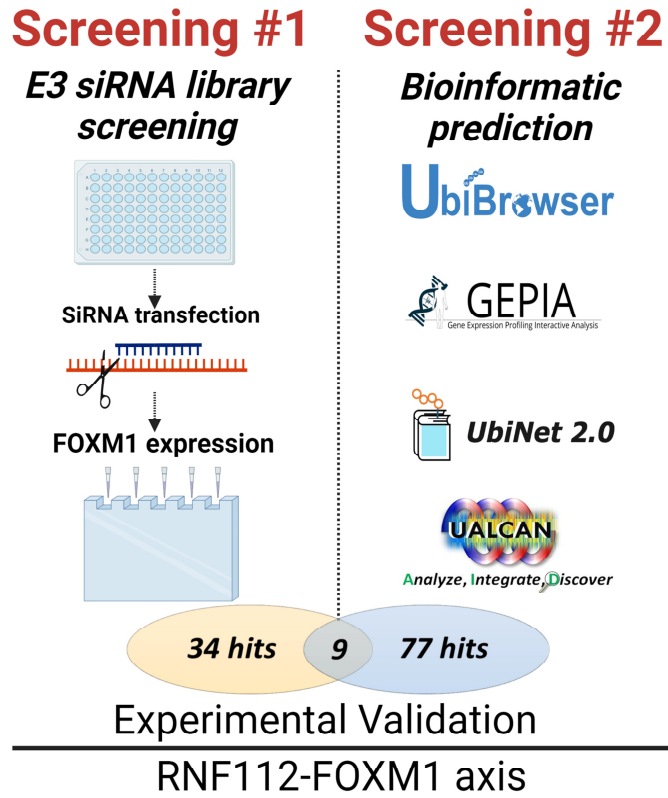

Supplemental Figure 1. Workflow of the identification of novel E3 ubiquitin ligases targeting FOXM1 degradation.

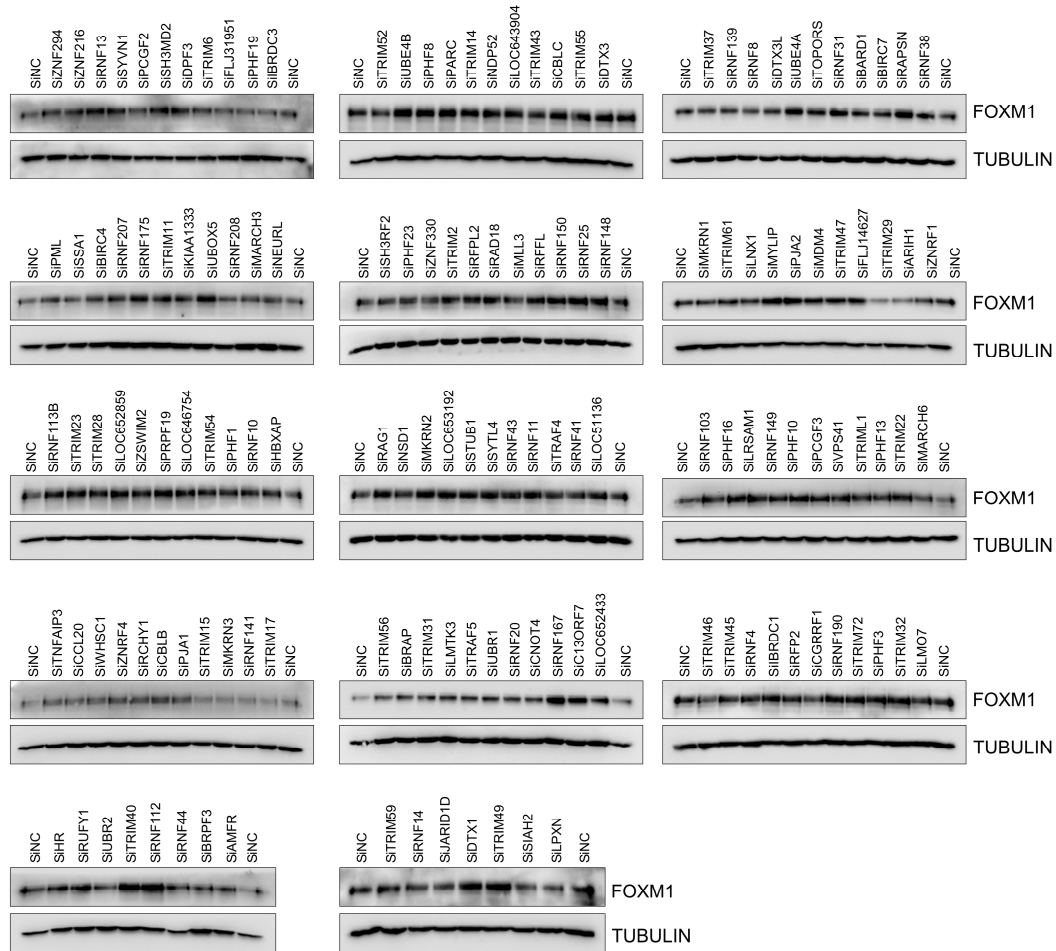

**Supplemental Figure 2. Representative immunoblot results of FOXM1 after the transfection of siRNA library targeting E3 ligases in HEK293T cells.** Western blot analysis of FOXM1 in HEK293T cells after the knockdown of indicated E3 ligases by siRNA transfection. After HEK293T cells seeded in 96-well plates, The mixture of ON-TARGET plus siRNA library (final siRNA concentration of 50 nM) and Lipofectamine 3000 together with Opti-MEM was added into to each well. The lysates were harvested for immunoblot analysis for endogenous FOXM1 expression 48 h later. Only those with apparent changes were listed.

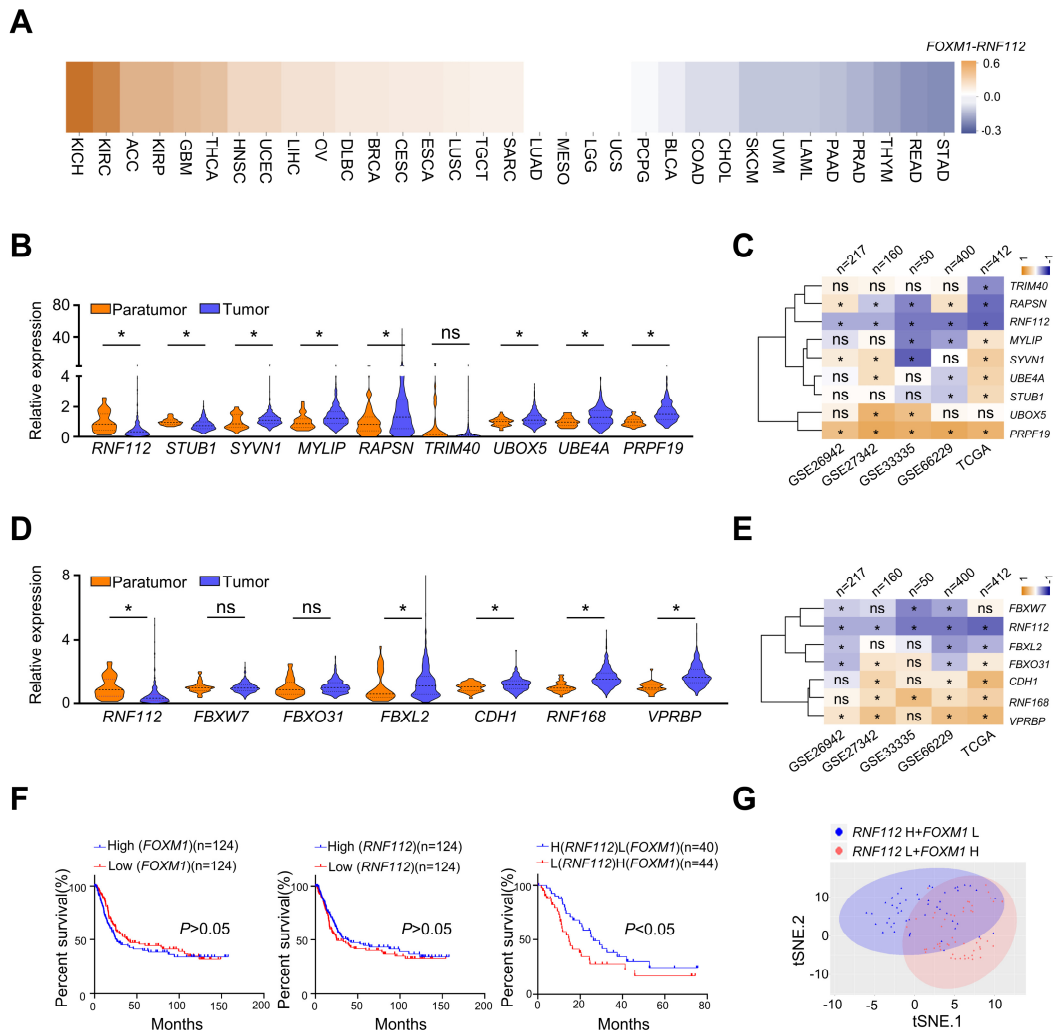

**Supplemental Figure 3. The bioinformatic screen for E3 ligases targeting FOXM1.** (A) The correlation between *FOXM1* and *RNF112* in 33 types of cancer tissues in TCGA. The color gradient depicts the strength of the correlation. (B) Violin plot of the expression of nine potential E3 ligases targeting *FOXM1* in gastric cancer and adjacent tissues from TCGA (n=412). (C) Heatmap of the correlation between nine potential E3 ligases and *FOXM1* in gastric cancer tissues from five independent cohorts of TCGA and GEO. Orange represents a positive correlation, and blue represents a negative correlation. (D) Violin plot of the expression of *RNF112* and six reported E3 ligases targeting *FOXM1* in gastric cancer and adjacent normal tissues from TCGA (n=412). (E) Heatmap of the correlation between the above E3 ligases and *FOXM1* in five independent gastric cancer cohorts. (F) Kaplan–Meier survival curves of gastric patients based on the expression of *FOXM1* and *RNF112* in the GSE15460 cohort. (G) tSNE cluster map showing subclusters of gastric cancer patients based on *FOXM1* and *RNF112* expression in GSE15460 cohort. Statistical significance was calculated using Mann–Whitney U test (B, D), Pearson’s test (C, E), log-rank test (F). \* $P < 0.05$ .

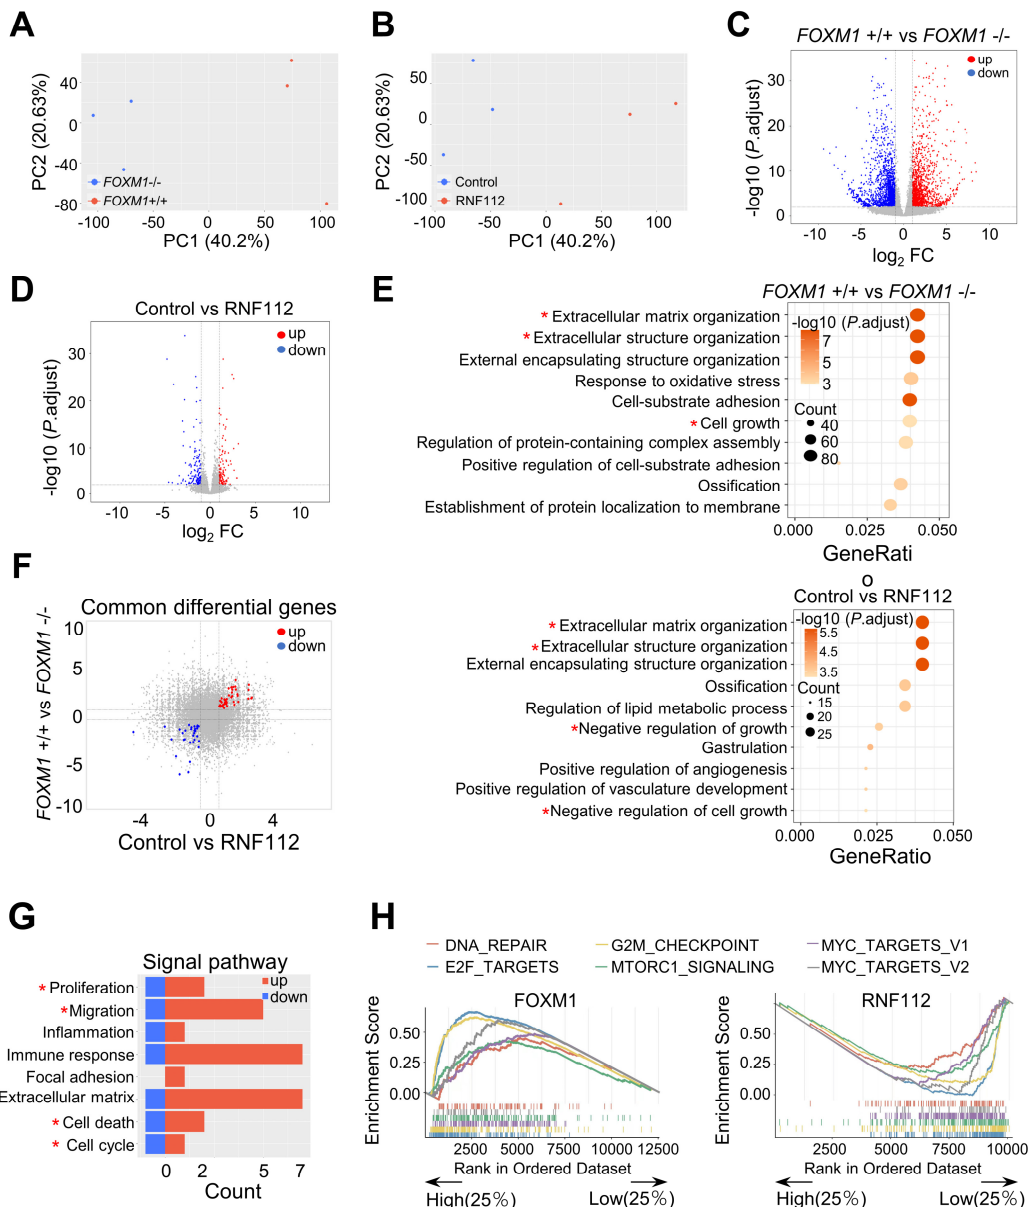

**Supplemental Figure 4. FOXM1 and RNF112 are both associated with the proliferation and invasion signaling pathways in gastric cancer. (A-B)** PCA analysis of RNA-Seq results of *FOXM1* knockout (A) and RNF112 overexpression MGC803 cells (B). **(C-D)** Volcano plots of differentially expressed mRNA revealed by RNA-seq in MGC803 cells between *FOXM1*<sup>+/+</sup> and *FOXM1*<sup>-/-</sup> group (C) and control and RNF112-overexpressing group (D). **(E)** GO enrichment analysis of biological processes of significantly changed genes from (C-D). **(F)** Scatter plot of common differentially expressed gene between the above two indicated groups. The genes with similar remarkable changes are highlighted. **(G)** GO enrichment analysis of pathways from highlighted genes in (F). **(H)** GSEA analysis based on the expression of *RNF112* and *FOXM1* in TCGA gastric cancer dataset.

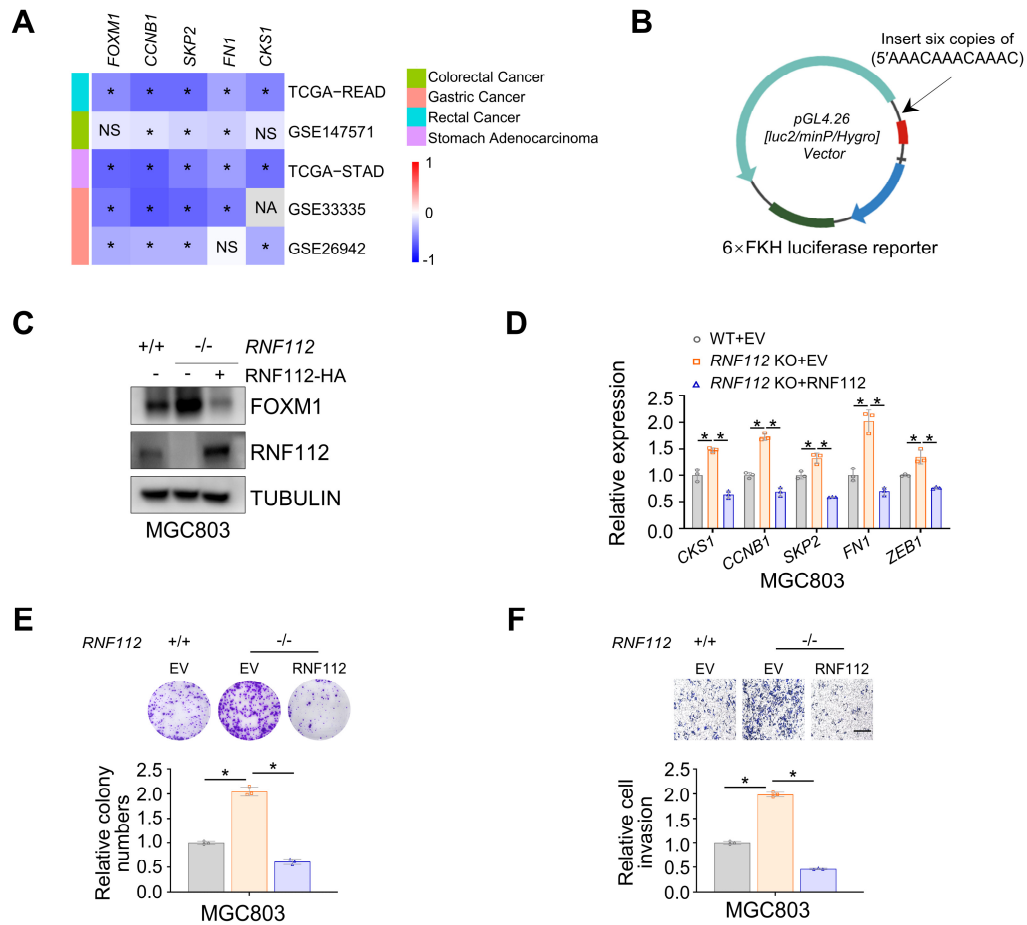

**Supplemental Figure 5. RNF112 suppresses FOXM1 downstream genes. (A)** The correlation between *RNF112* and *FOXM1*, *CCNB1*, *SKP2*, *FN1*, *CKS1* in several online datasets derived from TCGA and GEO. **(B)** Schematic illustration for the 6×FKH luciferase reporter plasmid containing six copies of the Forkhead consensus sequence (AAACAACAAC). **(C-F)** Immunoblot analysis (C), qRT-PCR analysis (D), colony formation assays (E), transwell invasion assays (F) of *RNF112*-depleted MGC803 cells infected with *RNF112* lentivirus (n=3). Scale bar, 400  $\mu$ m. Data are presented as mean $\pm$ SD. Statistical significance was calculated using Pearson's test (A), one-way ANOVA (D-F). NS, not significant, NA, not available, \* $P$ < 0.05.

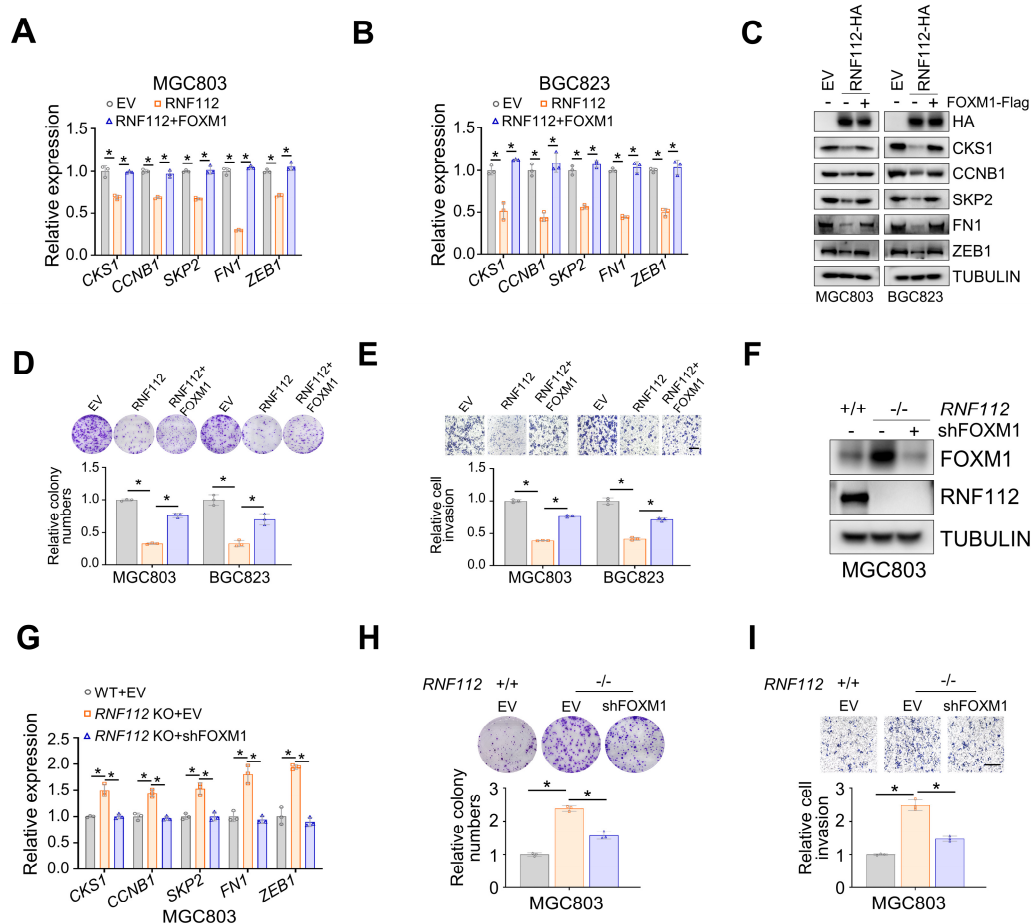

**Supplemental Figure 6. Anti-tumor effect of RNF112 is partially owed to FOXM1 degradation.** (A-C) qRT-PCR analysis (A-B) and immunoblot analysis (C) of the expression of FOXM1 downstream genes in RNF112 stably overexpressing MGC803 and BGC823 cells after the restoration of FOXM1 (n=3). (D-E) Colony formation assays (D) and transwell invasion assays (E) of RNF112 stably overexpressing MGC803 and BGC823 cells after the restoration of FOXM1 (n=3). Scale bar, 400  $\mu$ m. (F-I) Immunoblot analysis (F), qRT-PCR analysis (G), colony formation assays (H), transwell invasion assays (I) of RNF112 depleted MGC803 cells with FOXM1 knockdown (n=3). Scale bar, 400  $\mu$ m. Data are presented as mean $\pm$ SD. Statistical significance was calculated using one-way ANOVA. \* $P$ < 0.05. Complete unedited blots were listed in the supplemental material.

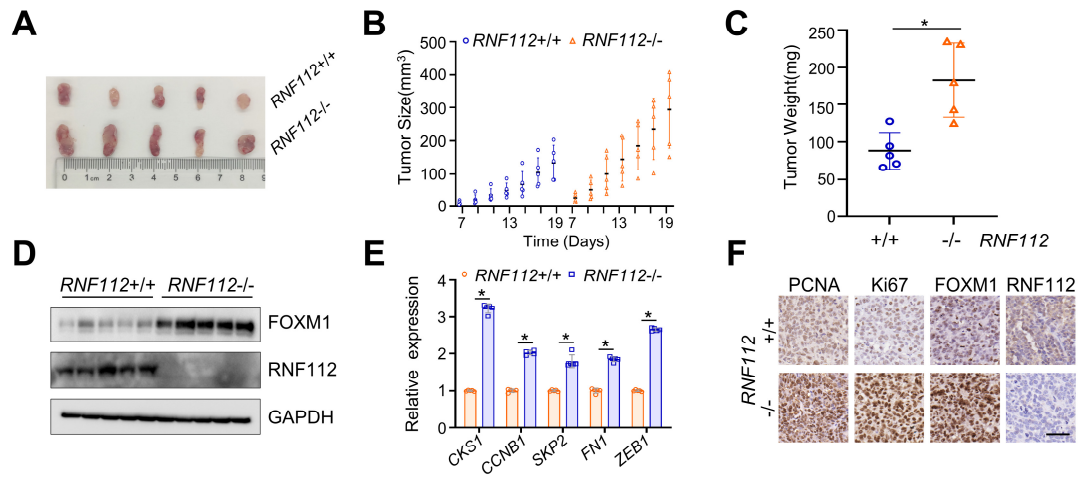

**Supplemental Figure 7 *RNF112* depletion promotes gastric cancer cell proliferation in vivo.** (A) Tumors were harvested after subcutaneous injection of wild-type or *RNF112*-depleted MGC803 cells in nude mice (n=5). (B-C) Tumor volume (B) and tumor weight (C) of the xenograft were calculated (n=5). (D-F) Immunoblot analysis (D), qRT-PCR (E) analysis and IHC staining (F) of tumors from the above mice (n=5). Scale bar, 50 $\mu$ m. Data are presented as mean $\pm$ SD. Statistical significance was calculated using Student's t test (C, E). \**P* < 0.05. Complete unedited blots were listed in the supplemental material.

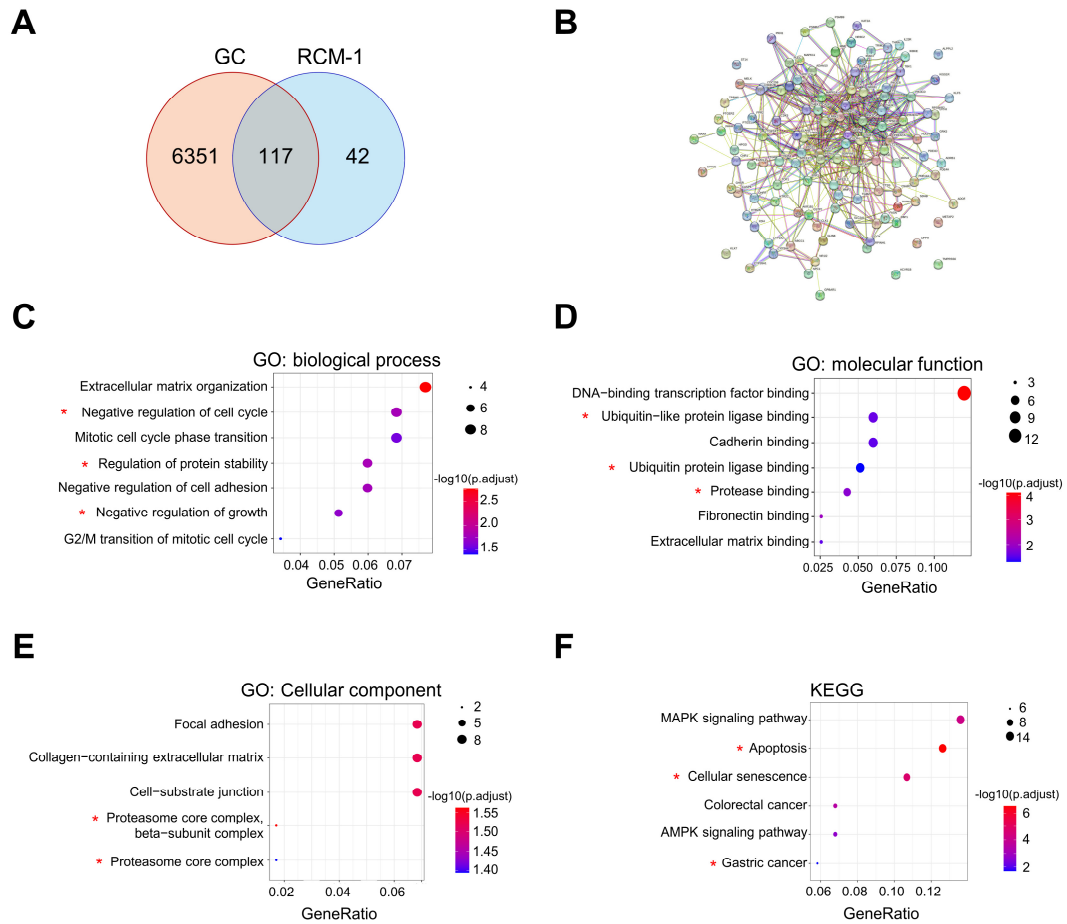

**Supplemental Figure 8. Network pharmacology analysis of the role of RCM-1 in gastric cancer.** (A) Venn diagram of common RCM-1 targets obtained from SuperPred database, Swiss database and SEA database and key genes of gastric cancer retrieved from GeneCards. (B) A component-target-disease model established by Cytoscape software. (C-F) GO biological process analysis (C), GO molecular function analysis (D), GO cellular component analysis (E), and KEEG pathway analysis (F) of the common genes in (A).



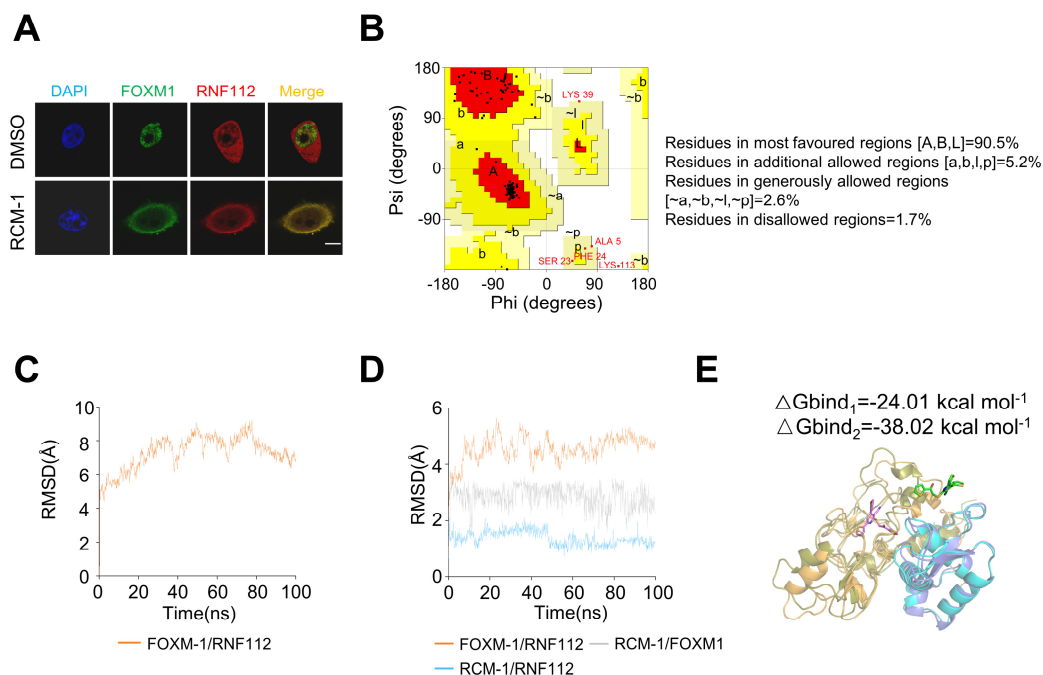

**Supplemental Figure 9. Molecular docking and molecular dynamics simulation analysis of FOXM1, RNF112 and RCM-1.** (A) Immunofluorescent analysis of cellular distribution of FOXM1 and RNF112 in MGC803 cells after DMSO or RCM-1 treatment (10  $\mu\text{M}$ ). Scale bar, 10 $\mu\text{m}$ . (B) Ramachandran plot analysis of  $\phi$  and  $\psi$  dihedral angles of the model of RNF112. (C) RMSDs of FOXM1/RNF112 complex for 100ns MD simulations. (D) RMSDs of FOXM1-RCM-1/RNF112-RCM-1 complex for 100ns MD simulations. (E) Comparison of binding modes and binding free energies of FOXM1/RNF112 complex (FOXM1, light blue; RNF112, olive;  $\Delta G_{bind_1}$ ) with those of FOXM1-RCM-1/RNF112-RCM-1 complex (FOXM1, cyan; RNF112, orange; RCM-1/FOXM1, green; RCM-1/RNF112, violet;  $\Delta G_{bind_2}$ ).

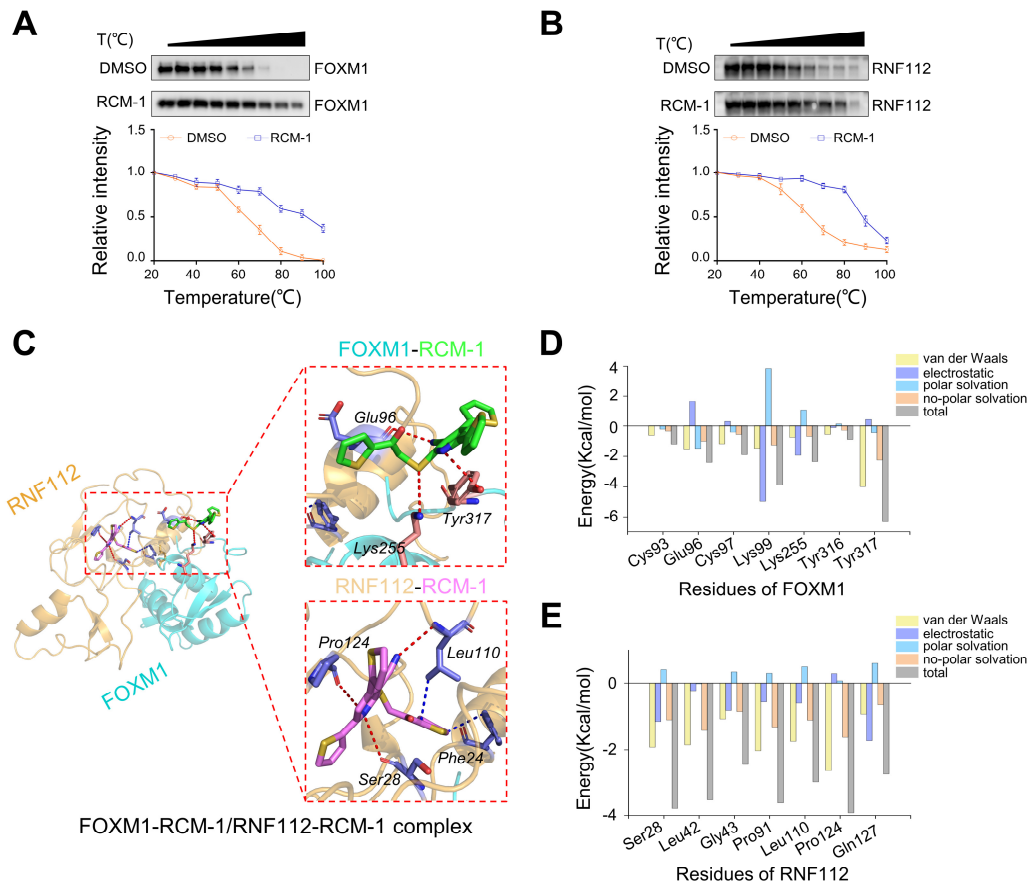

**Supplemental Figure 10. Possible binding modes among FOXM1, RNF112 and RCM-1. (A-B)** Thermal shift assays of MGC803 cells in the presence of DMSO or RCM-1 (10  $\mu$ M). MGC803 cells were lysed using RIPA buffer containing protease inhibitor and the final concentration of the lysates was adjusted to 3mg/ml. The lysates were heated in the presence of 10  $\mu$ M RCM-1 or DMSO at various temperatures for 4 min and then subjected to immunoblot analysis. **(C)** Docking model of FOXM1-RCM-1/RNF112-RCM-1 complex. Red and blue dashed lines indicate hydrogen bonds and hydrophobic interaction respectively. **(D-E)** Contributions of binding free energies calculated by MM/GBSA method for key residues of FOXM1/RNF112 complex with RCM-1(FOXM1) (D) and RCM-1(RNF112) (E). Data are presented as mean  $\pm$  SD. Complete unedited blots were listed in the supplemental material.

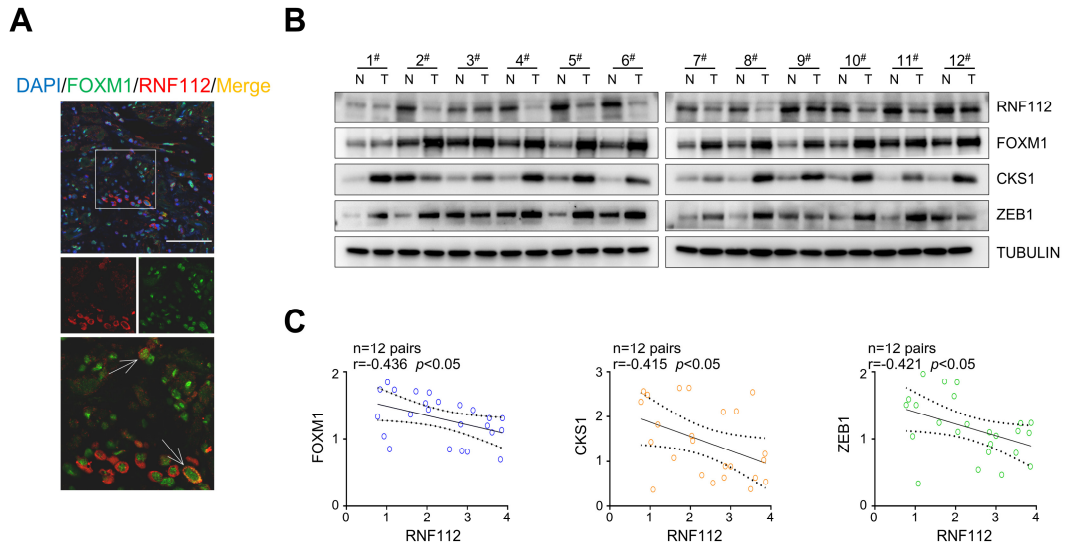

**Supplemental Figure 11. RNF112 is negatively correlated with FOXM1 in gastric cancer tissues.** (A) Immunofluorescence of the colocalization of FOXM1 and RNF112 in gastric cancer tissues. White arrow indicates the colocalization. Scale bar, 100  $\mu$ m. (B) Immunoblot analysis of the protein expression of FOXM1, RNF112, CKS1, and ZEB1 in 12 pairs of gastric cancer tissues (T) and corresponding non-cancerous tissues (N) (n=12 pairs). (C) The correlation between expression of RNF112 and that of FOXM1, CKS1, and ZEB1, respectively (n=12 pairs). Statistical significance was calculated using Pearson's test (C). Complete unedited blots were listed in the supplemental material.

**Supplementary Table 1 The List of siRNA Sequences**

| <b>Genesymbol</b> | <b>GENEID</b> | <b>GINumber</b> | <b>Sequence</b>      |
|-------------------|---------------|-----------------|----------------------|
| MDM2              | 4193          | 46488908        | GAAUUUAGACAACCUGAAA  |
| MDM2              | 4193          | 46488908        | GAUGAGAAGCAACAACAUA  |
| MDM2              | 4193          | 46488908        | GCCAGUAUUAUUGACUAA   |
| MDM2              | 4193          | 46488908        | GAACAAGAGACCCUGGUUA  |
| PHF7              | 51533         | 27894286        | GUCCAAGGGUGUCAGAAUC  |
| PHF7              | 51533         | 27894286        | GAACCUUCCUUAUUAGAAA  |
| PHF7              | 51533         | 27894286        | GAUCAGUGCCUCAGAAACU  |
| PHF7              | 51533         | 27894286        | CAGCAAAGCAUUUCUCAA   |
| TRIM39            | 56658         | 25777697        | GCAACUAGGCAGUAUGGUG  |
| TRIM39            | 56658         | 25777697        | GAAGAAUGCUGCACCACUU  |
| TRIM39            | 56658         | 25777697        | UCGAGAUGCUIAAGGAUGU  |
| TRIM39            | 56658         | 25777697        | UUAACAGCUAAUUGCGGA   |
| TRIM41            | 90933         | 42516573        | CCAAUAUGGUCCAGGUGAU  |
| TRIM41            | 90933         | 42516573        | CAAUAGGUGUGAAGAGGUA  |
| TRIM41            | 90933         | 42516573        | UAGCUUCACUUGAGAGAGA  |
| TRIM41            | 90933         | 42516573        | GAGAUGAGUUAGAUCGGGA  |
| RNF133            | 168433        | 21040268        | GAGCAAGUGUUGUUUGGAU  |
| RNF133            | 168433        | 21040268        | GGUUGUACCUUCACACAGA  |
| RNF133            | 168433        | 21040268        | CUAAUGACAUAGUUCGUAU  |
| RNF133            | 168433        | 21040268        | GAGAGUGGCAGGAGUUAUA  |
| KIAA1718          | 80853         | 90093354        | UGAUGGAUGUGGAACGUUA  |
| KIAA1718          | 80853         | 90093354        | CUAUAACAACCCGUGUUA   |
| KIAA1718          | 80853         | 90093354        | CCUAGUACAGGGAGUGAAA  |
| KIAA1718          | 80853         | 90093354        | GUACCUGAAUGGAGAGCGA  |
| RNF32             | 140545        | 37595535        | AAAUAAAGGGUCACUCAUCU |
| RNF32             | 140545        | 37595535        | AGUCAAUUGCAGUUGCUUUA |
| RNF32             | 140545        | 37595535        | GAUCAGUGCUUGGCCAUAA  |
| RNF32             | 140545        | 37595535        | GAGAGGAUGUGUUGUAGA   |
| INTS12            | 57117         | 21361850        | GUCAGUAACUAGUGGCUUA  |
| INTS12            | 57117         | 21361850        | GCUCAAUGCUAUGAAGCGA  |
| INTS12            | 57117         | 21361850        | UGUCAAGAUCCAUUGGUU   |
| INTS12            | 57117         | 21361850        | GAAGUAAUGUGGCCAAGUA  |
| ZNF592            | 9640          | 7661999         | AGUCAUUUGAAGCGGAGAA  |
| ZNF592            | 9640          | 7661999         | UGGAAGAAUGUGCCGGUGA  |
| ZNF592            | 9640          | 7661999         | CAUCAAAAGUAACCGGAUUU |
| ZNF592            | 9640          | 7661999         | CAGCAAAGGCUCACCGUCU  |
| LOC92312          | 92312         | 88952495        | GGGCAACCAUCAAGCGCAU  |
| LOC92312          | 92312         | 88952495        | GAGCGAGACAGGCGACCAA  |
| LOC92312          | 92312         | 88952495        | GCAUUAUAUUUAGGGAGUA  |
| LOC92312          | 92312         | 88952495        | GCAAAAUAAAAGCGGGAAA  |
| PRPF19            | 27339         | 34222313        | GUACUAAUGUGGCCAACUU  |
| PRPF19            | 27339         | 34222313        | GAUCUGCGCAAGCUUAAGA  |
| PRPF19            | 27339         | 34222313        | GAUAACAACUUUGAGGUAA  |
| PRPF19            | 27339         | 34222313        | GCACGGAUGUCCAGAUCUA  |
| RBX1              | 9978          | 22091459        | GGGAUAUUGUGGUUGAUAA  |
| RBX1              | 9978          | 22091459        | GAAGCGCUUUGAAGUGAAA  |
| RBX1              | 9978          | 22091459        | CAUAGAAUGUCAAGCUAAC  |
| RBX1              | 9978          | 22091459        | GGAACCACAUAUGGAUCU   |
| LOC653111         | 653111        | 113422565       | CCAUCAGGUUUCAUUGUAU  |
| LOC653111         | 653111        | 113422565       | AAUCUAUCCUUGAGGUAA   |
| LOC653111         | 653111        | 113422565       | AGUGAAGUCUCAUGAUAA   |
| LOC653111         | 653111        | 113422565       | CGCUAAAAGUAUACGUAUU  |
| HRC               | 3270          | 75905816        | ACACAGUGGUCAAGGAUAG  |
| HRC               | 3270          | 75905816        | GGUCAAGAGGGUCCAUCA   |
| HRC               | 3270          | 75905816        | GCACCAAGGCCACGGGAUU  |
| HRC               | 3270          | 75905816        | CAAGGAAUAUGGGCACCUA  |
| MYCBP2            | 23077         | 56118211        | GAAUAGUUGUGGUUGGUUU  |
| MYCBP2            | 23077         | 56118211        | GCAAGGAUUUGGUGUGUGU  |
| MYCBP2            | 23077         | 56118211        | GGAAGUAGUUCUGUUAUUU  |
| MYCBP2            | 23077         | 56118211        | GCAGAAAUGCCCACACUUU  |

|              |        |           |                      |
|--------------|--------|-----------|----------------------|
| PRICKLE1     | 144165 | 23308518  | GAUGAUGAUUCCUGGUGUU  |
| PRICKLE1     | 144165 | 23308518  | GAGAGAAGCAUCGGAUUAA  |
| PRICKLE1     | 144165 | 23308518  | CCAUGAGAUGGAUAUUCG   |
| PRICKLE1     | 144165 | 23308518  | GAACAAGUUUUGCCAGUGA  |
| CBL          | 867    | 52426744  | UAGCCCACCUUAUAUCUUA  |
| CBL          | 867    | 52426744  | GGAGACACAUUUCGGAUUA  |
| CBL          | 867    | 52426744  | AAUCAACUCUGAACGGAAA  |
| CBL          | 867    | 52426744  | GACAAUCCCUCACAAUAAA  |
| CHD5         | 26038  | 24308088  | CACCGAAUCCUGAACCAUA  |
| CHD5         | 26038  | 24308088  | CGGGAGGGAUUGUCAACUA  |
| CHD5         | 26038  | 24308088  | AGGAUGAGCUCUCUGAUAA  |
| CHD5         | 26038  | 24308088  | GGAAAGACCUGCCCUACGA  |
| RNF180       | 285671 | 31341781  | CCAAGAGCCGGACUGAUUA  |
| RNF180       | 285671 | 31341781  | CAAGUAUUCUUCGUUGUUG  |
| RNF180       | 285671 | 31341781  | AAACAUGCCCGAAAUAUU   |
| RNF180       | 285671 | 31341781  | GAAUGGAUAAGCUGCCUAA  |
| PHF21A       | 51317  | 19923461  | GACACUACCUCUCGUCUUG  |
| PHF21A       | 51317  | 19923461  | AAGAGUAGUUGAACAGCUA  |
| PHF21A       | 51317  | 19923461  | GCAAUCCAUAAGUAAAUG   |
| PHF21A       | 51317  | 19923461  | GCAGUGACAUACCUAAAACA |
| TRIM6-TRIM34 | 445372 | 51477689  | CGAUUUAGUGUCUGGAACA  |
| TRIM6-TRIM34 | 445372 | 51477689  | GCCCAAAGCCUGUUAGCCA  |
| TRIM6-TRIM34 | 445372 | 51477689  | AGAACAUAUUCGCGCAUA   |
| TRIM6-TRIM34 | 445372 | 51477689  | CUAUUUGGCUACUGGGUUA  |
| LOC642678    | 642678 | 113413044 | AGCAACAUCUGCAGGUCUA  |
| LOC642678    | 642678 | 113413044 | GUGUGAUGAUUGUGACAUA  |
| LOC642678    | 642678 | 113413044 | GGUUGGAGGUGUCUUGAGU  |
| LOC642678    | 642678 | 113413044 | AAGUGCAAUUGGUGUGUUU  |
| MARCH8       | 220972 | 50539413  | GGAAGAGACUCAAGGCCUA  |
| MARCH8       | 220972 | 50539413  | UAAAGUGUAUGUGCAAUUG  |
| MARCH8       | 220972 | 50539413  | GAAUGGCCCUUUUGGACUA  |
| MARCH8       | 220972 | 50539413  | GAGCAGAAAUCAUUCACGU  |
| PHF20L1      | 51105  | 39653322  | GCGCUAACAGCAAUAAAGA  |
| PHF20L1      | 51105  | 39653322  | GCAAAGAGAGCUCGACUUA  |
| PHF20L1      | 51105  | 39653322  | CAGAGAGCACAUUAUCAA   |
| PHF20L1      | 51105  | 39653322  | CCACACCAGACGUAGAGAA  |
| RNF152       | 220441 | 27734872  | GAUAUCCUGUGGCUGAAGA  |
| RNF152       | 220441 | 27734872  | CAAGAAAAGGUGGCAAGGUA |
| RNF152       | 220441 | 27734872  | CACAACAUGUCUUGCAUUU  |
| RNF152       | 220441 | 27734872  | GGUGUGCACUGUCAUCUUG  |
| RFWD2        | 64326  | 50428921  | GCUAAUGUGUGCUGUGUUA  |
| RFWD2        | 64326  | 50428921  | CUACAAGGAUGUCUCGUUA  |
| RFWD2        | 64326  | 50428921  | CAUAAGAACCUGUUAGCUA  |
| RFWD2        | 64326  | 50428921  | GAAUUGGUAUGAAGGGUUA  |
| RSPRY1       | 89970  | 45387948  | CAGUAUUAGUGACCGGCUU  |
| RSPRY1       | 89970  | 45387948  | GCAAUGAUGUCAGCGAGUA  |
| RSPRY1       | 89970  | 45387948  | CAAGUCAGUAUCCGAGAAA  |
| RSPRY1       | 89970  | 45387948  | CUGAUUAUCUGAAACGUCA  |
| MID2         | 11043  | 16445408  | GGUCAACAGUCCUCAUCAA  |
| MID2         | 11043  | 16445408  | GCAAAUGAUCGUCUGUCAA  |
| MID2         | 11043  | 16445408  | GCGCAACAGCGAACUAGAA  |
| MID2         | 11043  | 16445408  | AAUCAAAUGGCCAAACUAA  |
| MLLT6        | 4302   | 57222567  | CAUGAUCGCUUCAACAAGA  |
| MLLT6        | 4302   | 57222567  | GCUCGUCGUCGUCCUCCA   |
| MLLT6        | 4302   | 57222567  | GUAGGAGGCUGCUGCGUAU  |
| MLLT6        | 4302   | 57222567  | AGCCAUAGCCUGAGUCAUA  |
| ZMYND11      | 10771  | 47078242  | ACAAUAAACACCCGAUGUA  |
| ZMYND11      | 10771  | 47078242  | GCAAAGAAAGGACGACGUA  |
| ZMYND11      | 10771  | 47078242  | CGAGGAUGCUAUUAAAAGA  |
| ZMYND11      | 10771  | 47078242  | GGAGAGGGCUAUAGAUCUU  |
| BIRC3        | 330    | 33946284  | GUUCAUCCGUCAGUUCAA   |
| BIRC3        | 330    | 33946284  | CUAACUGCCGAAUUAUUA   |
| BIRC3        | 330    | 33946284  | CAUGUGAACUGUACCGAAU  |

|         |        |          |                      |
|---------|--------|----------|----------------------|
| BIRC3   | 330    | 33946284 | UAACGAAAAUGCCAGAUUA  |
| MIB2    | 142678 | 21264329 | UGGCGGAGUUUAUCGGACA  |
| MIB2    | 142678 | 21264329 | CCUCAAGGGUCACGCGCUA  |
| MIB2    | 142678 | 21264329 | GCGAGUGGACGGACGACAU  |
| MIB2    | 142678 | 21264329 | GCUAGAGGCCAGUCCCAAA  |
| TRIM62  | 55223  | 8922647  | AGACCAACCUCACAUUAUGA |
| TRIM62  | 55223  | 8922647  | GACCAAGUCUCCACCAAG   |
| TRIM62  | 55223  | 8922647  | CUACAAUGCUGAUGACAUG  |
| TRIM62  | 55223  | 8922647  | GCGAGAAGUCCCCUGGCAA  |
| RNF125  | 54941  | 37595554 | UUAGACCGGUCACUUCUUG  |
| RNF125  | 54941  | 37595554 | GAAAUGAGGGCACAUUUC   |
| RNF125  | 54941  | 37595554 | UUUAAUACCCGAUGAGAAU  |
| RNF125  | 54941  | 37595554 | GCAGCAAGGUGUGUAUGUC  |
| BMI1    | 648    | 39725706 | GGUUCGACCUUUGCAGUA   |
| BMI1    | 648    | 39725706 | CCUCGAAAUCAUCAGUAA   |
| BMI1    | 648    | 39725706 | GAAAUUCAACCAACGGAAA  |
| BMI1    | 648    | 39725706 | ACAUAAGCAUUGGGCCAUA  |
| PHF20   | 51230  | 40804464 | CUGGAGUGAUGAUGAGUAU  |
| PHF20   | 51230  | 40804464 | AGACAUUGACUACGAGGAA  |
| PHF20   | 51230  | 40804464 | GAGGAUAAUUUGAGUGAGU  |
| PHF20   | 51230  | 40804464 | GCGUGAUGAUUGUUGUAUU  |
| ZNF313  | 55905  | 40807455 | GGAACACUGCAAAUUAUUC  |
| ZNF313  | 55905  | 40807455 | GUGUGAAGGCCACCAUUA   |
| ZNF313  | 55905  | 40807455 | GCUUAGAGGUGUACGAGAA  |
| ZNF313  | 55905  | 40807455 | GCACGGAUACCAAAUCUGU  |
| RNF185  | 91445  | 31542782 | GGCCAGAGCCGGAGAAUAG  |
| RNF185  | 91445  | 31542782 | GCCACAGCAUUAAUUAUAA  |
| RNF185  | 91445  | 31542782 | UCACGCCUCUCCUAUUUG   |
| RNF185  | 91445  | 31542782 | GGUGUGUCCUGUUUGCAA   |
| ZNRF3   | 84133  | 51476052 | GAAAUUGGGAACUGUAUGG  |
| ZNRF3   | 84133  | 51476052 | GCAGAUCUAGGUUAGGUA   |
| ZNRF3   | 84133  | 51476052 | UCAAGAGGCCGGUGGUGUA  |
| ZNRF3   | 84133  | 51476052 | UCACUUCUGUCAUCCUAUU  |
| JARID1B | 10765  | 57242795 | UAAGUUAGUUGCAGAAGAA  |
| JARID1B | 10765  | 57242795 | GGAGAUGCACUUCGAUUA   |
| JARID1B | 10765  | 57242795 | GGAAGAUCUUGGACUUUU   |
| JARID1B | 10765  | 57242795 | UCGAAGAGAUCCUGCAUA   |
| RNF123  | 63891  | 37588868 | CAACUGGGCCUUCUCUGAA  |
| RNF123  | 63891  | 37588868 | GCGCUACUAUUGGGAUGAA  |
| RNF123  | 63891  | 37588868 | GGUGAAGCUUCUAGGUUA   |
| RNF123  | 63891  | 37588868 | GCACAUGGCCGACCUCUA   |
| PHF11   | 51131  | 7705832  | UCUGAUGGAGUUCGAGGAA  |
| PHF11   | 51131  | 7705832  | GCCCCAAAGAUGUCGAAUA  |
| PHF11   | 51131  | 7705832  | CGCUCAAAGUGC UAAAUUU |
| PHF11   | 51131  | 7705832  | ACUGUAGAUUGUUCGAAGA  |
| TRIM60  | 166655 | 37622897 | CCACAAGUAUCAAACCUA   |
| TRIM60  | 166655 | 37622897 | GAGGAAUAAUAGAACGA    |
| TRIM60  | 166655 | 37622897 | GCAAUUGGGCGAUACAUGA  |
| TRIM60  | 166655 | 37622897 | GGGCAAGUCUGUGCAGUCA  |
| TRIM8   | 81603  | 13569865 | UGUACAAACUCGAGUCAGA  |
| TRIM8   | 81603  | 13569865 | GGACAACUGUUACUGUUCU  |
| TRIM8   | 81603  | 13569865 | GAGAUCCGAAGGAAUGAAA  |
| TRIM8   | 81603  | 13569865 | GCAAGAUUCUCGUCUGUUC  |
| RNF122  | 79845  | 38045930 | UGAAAUGGCUGGAAGUUCG  |
| RNF122  | 79845  | 38045930 | CAACACGCCUUUCACCGCA  |
| RNF122  | 79845  | 38045930 | AGAGUGAGCGAUACGGAUA  |
| RNF122  | 79845  | 38045930 | GAACAUUGGGAUUCUAUUG  |
| RNF39   | 80352  | 25777717 | CAUUGCAGGAGUAUUAUA   |
| RNF39   | 80352  | 25777717 | CUACAGUACUCCUGACUU   |
| RNF39   | 80352  | 25777717 | GGAAAGCGGCAAAAGUUA   |
| RNF39   | 80352  | 25777717 | GUGGAGAGAUUUGACGAGA  |
| RNF12   | 51132  | 34452683 | CUGCAUCGAUCGCGGUUA   |
| RNF12   | 51132  | 34452683 | GCAAUUCAGACCAUGUUA   |

|           |        |          |                      |
|-----------|--------|----------|----------------------|
| RNF12     | 51132  | 34452683 | CCACGAAGAUCUCAUCAUA  |
| RNF12     | 51132  | 34452683 | CAGAGAAAGUGUUGUGUAA  |
| RNF135    | 84282  | 37655168 | UGGAACAUCUUGUAGACAU  |
| RNF135    | 84282  | 37655168 | CAUCCAACCUUUAACUUGA  |
| RNF135    | 84282  | 37655168 | UAGAGAAGAGCAUCACAGA  |
| RNF135    | 84282  | 37655168 | GGACCUGGCCGACAAGUAC  |
| ZNRF2     | 223082 | 40316919 | GUAAAUAGAUCUUGCCUG   |
| ZNRF2     | 223082 | 40316919 | CAAUAUGCCUUGAAGAAU   |
| ZNRF2     | 223082 | 40316919 | GCACAUGUUUGGAGGAUUU  |
| ZNRF2     | 223082 | 40316919 | GCACGACUGCCUUGUCUAU  |
| RKHD1     | 399664 | 42558261 | GAGCCGGUCUUCAUCGUGA  |
| RKHD1     | 399664 | 42558261 | GUUUUGAGUGGUCAGGUUA  |
| RKHD1     | 399664 | 42558261 | GCGACAAGGAGCCGGUGUU  |
| RKHD1     | 399664 | 42558261 | GCCGAACACUUCUCAUCA   |
| TRIM67    | 440730 | 52138585 | UAACCUGGCUUUAUAGUG   |
| TRIM67    | 440730 | 52138585 | GAAGGUGGCGUGUGCAAGG  |
| TRIM67    | 440730 | 52138585 | GCACAAGGCACAACUAUCU  |
| TRIM67    | 440730 | 52138585 | GGUAAGGAGACUUUGUGUA  |
| LOC644006 | 644006 | 88943821 | CCAGAAGCGAACACGGGAA  |
| LOC644006 | 644006 | 88943821 | GCAGUGACGAUGAGUUGUU  |
| LOC644006 | 644006 | 88943821 | UUGAAACCCACGUCUGAUA  |
| LOC644006 | 644006 | 88943821 | GGGCAAUCCCGUUUCCUAA  |
| PHF6      | 84295  | 63478059 | GCAUGAUAAGCUCAAAUA   |
| PHF6      | 84295  | 63478059 | AGAUAGGUCUCCACACAGA  |
| PHF6      | 84295  | 63478059 | UGUGGACAGUUACUAAUUA  |
| PHF6      | 84295  | 63478059 | GCACGAAGCUGAUGUGUUC  |
| TRIM63    | 84676  | 19924162 | GAGGAUCCCGUCGAGUGA   |
| TRIM63    | 84676  | 19924162 | GGAAGAAGGACACCAGUAA  |
| TRIM63    | 84676  | 19924162 | GCAAGGAGCACGAAGAUGA  |
| TRIM63    | 84676  | 19924162 | AGACUGAACUGAAUAACUG  |
| RFPL4B    | 442247 | 61966914 | AGUCUGUAGAUGCAGAUAA  |
| RFPL4B    | 442247 | 61966914 | GUAAGAAGAUCACCACGA   |
| RFPL4B    | 442247 | 61966914 | GAUAUUAGGUUUUGUGGAU  |
| RFPL4B    | 442247 | 61966914 | AAGAAUGGCAAGUGAGCGU  |
| PDZRN3    | 23024  | 57529736 | GACACGAGCUCUCAGAUUA  |
| PDZRN3    | 23024  | 57529736 | GUGGACCUCUACAGAAUGA  |
| PDZRN3    | 23024  | 57529736 | CAACGAGUCUUUCAUUUCG  |
| PDZRN3    | 23024  | 57529736 | GCACUAGAGUAUACAAUUC  |
| C6ORF49   | 29964  | 32171176 | CCGAAAUACCGGACAACGU  |
| C6ORF49   | 29964  | 32171176 | GGAUGUCGGACUAAGCGAA  |
| C6ORF49   | 29964  | 32171176 | AGACUGGACUCGACCGAAC  |
| C6ORF49   | 29964  | 32171176 | GGGACCAAACCUCGGUGAA  |
| PHF5A     | 84844  | 55925655 | GGAACUGACUGUGAAGCGA  |
| PHF5A     | 84844  | 55925655 | UGGCACACCAUAUCGGAGA  |
| PHF5A     | 84844  | 55925655 | CCUCUUCUAUGAACGCAA   |
| PHF5A     | 84844  | 55925655 | UGGUGUUGCCAUCGGAAGA  |
| C20ORF18  | 10616  | 14043031 | UCACAGUGCGCCUGAUUA   |
| C20ORF18  | 10616  | 14043031 | GACAGUGGCGUCUCUCAAG  |
| C20ORF18  | 10616  | 14043031 | CCUCAUACCAGCCCGACGA  |
| C20ORF18  | 10616  | 14043031 | GGACAGUGCCUACCUCUAU  |
| TRIM75    | 391714 | 88981293 | GAGAGUAGCCCAUCGAUCU  |
| TRIM75    | 391714 | 88981293 | GAUUGAAAUUGCCAAGCUA  |
| TRIM75    | 391714 | 88981293 | GAGACCACCUUGUGCGAGA  |
| TRIM75    | 391714 | 88981293 | GGGCACAACUUCUGUCGUU  |
| PHF17     | 79960  | 40556392 | CCAGACAUGAAGAUCGAAA  |
| PHF17     | 79960  | 40556392 | GCUAUGAAGCCCACCCGUA  |
| PHF17     | 79960  | 40556392 | UGAGGAUUCUGACGACAAU  |
| PHF17     | 79960  | 40556392 | CAGCGAUGCUACGACAAUA  |
| TRIM42    | 287015 | 29029527 | GCGAUACCCAGGUGGAUGA  |
| TRIM42    | 287015 | 29029527 | GUUCAAAAGCAGUCCGAUUA |
| TRIM42    | 287015 | 29029527 | GCAACAGGCGCAUCGCUUA  |
| TRIM42    | 287015 | 29029527 | CAGAAUACGUGUUUAAAGU  |
| BAHD1     | 22893  | 41281572 | GAGCCAGCCAUCCGAAAGA  |

|        |        |          |                      |
|--------|--------|----------|----------------------|
| BAHD1  | 22893  | 41281572 | CCGCACUAAUGGCUGGGUA  |
| BAHD1  | 22893  | 41281572 | AAAUCAGGCCACGAAAGA   |
| BAHD1  | 22893  | 41281572 | ACACACACUCGGAGAAAGU  |
| WDR24  | 84219  | 14149986 | GUUCACAGCCCACAACGGA  |
| WDR24  | 84219  | 14149986 | GAACACAAGCGCACGGUAA  |
| WDR24  | 84219  | 14149986 | GGGACGUGCAGUUCAGUUA  |
| WDR24  | 84219  | 14149986 | CGACGUACCUGCCGACUAC  |
| DTX4   | 23220  | 51468788 | CCACAUCUACUGCUUGGUU  |
| DTX4   | 23220  | 51468788 | GGAUCGACCUCACUCCAUC  |
| DTX4   | 23220  | 51468788 | GGCUUUAGCUACGUAUUUG  |
| DTX4   | 23220  | 51468788 | GGUGAUGAGUGUUAAGGCA  |
| TRIM26 | 7726   | 60279912 | CAACGAGGCCUGAGGGAAU  |
| TRIM26 | 7726   | 60279912 | GCAUCGCCUGGAUUAUGA   |
| TRIM26 | 7726   | 60279912 | UGAGAGACUUGGAAUAUAA  |
| TRIM26 | 7726   | 60279912 | CUAAACAGGUAUCCACGGA  |
| PHF21B | 112885 | 19923936 | UGAGACUGAUACAGGGCGA  |
| PHF21B | 112885 | 19923936 | GUUUUAAACUCGAUCGAUG  |
| PHF21B | 112885 | 19923936 | GGACUCAGUUUGCCGUUGA  |
| PHF21B | 112885 | 19923936 | UAGCUGAGUGGUAGCGGUA  |
| MARCH4 | 57574  | 57977324 | GUACUGCUAUGGAUUGUGU  |
| MARCH4 | 57574  | 57977324 | GACCGAGGAUCGCUACUCA  |
| MARCH4 | 57574  | 57977324 | GAGCUGGUCAUGAGAGUCA  |
| MARCH4 | 57574  | 57977324 | UGGCUCAUCUGGUCAACUU  |
| ANKIB1 | 54467  | 51493000 | GCACAUCGUGGUAAGUUC   |
| ANKIB1 | 54467  | 51493000 | GCACAAUACUCCAUAUCAU  |
| ANKIB1 | 54467  | 51493000 | GCCAGAAGAUUCAUUGUUU  |
| ANKIB1 | 54467  | 51493000 | UAUCAAAAGUUGGUCAGAA  |
| OIT3   | 170392 | 22749296 | CGGUAAAAGCAGUACACGUC |
| OIT3   | 170392 | 22749296 | CUACAGGGCCAGACGCUAA  |
| OIT3   | 170392 | 22749296 | UUGAAGAGCCUUACCGGGA  |
| OIT3   | 170392 | 22749296 | GGAAAUCAUGAGCCGAAAU  |
| MGRN1  | 23295  | 44917607 | GAGCACUCUUGUCCCUUA   |
| MGRN1  | 23295  | 44917607 | GAACUCGGCCUACGCUAC   |
| MGRN1  | 23295  | 44917607 | GAACAUGGAUCUGAACUUC  |
| MGRN1  | 23295  | 44917607 | CGAAGGAGAUGUGGUGGAA  |
| RNF7   | 9616   | 34304332 | GCGACAAGAUGUUCUCCCU  |
| RNF7   | 9616   | 34304332 | CAAGAGGACUGUGUUGUGG  |
| RNF7   | 9616   | 34304332 | GCAUGUCCUGUGGGUGAA   |
| RNF7   | 9616   | 34304332 | UGUCUUAGAUGUCAAGCUG  |
| WDSUB1 | 151525 | 22749102 | UCCAAUAACUAGAGAACUU  |
| WDSUB1 | 151525 | 22749102 | CAAUUCGCCUGUACUCGUU  |
| WDSUB1 | 151525 | 22749102 | GGAAUUACCUGCUGCGAUU  |
| WDSUB1 | 151525 | 22749102 | CCAGGUAUGUCACAACUUG  |
| PCGF1  | 84759  | 14249239 | ACAAGUAUGUCCGAUGUUC  |
| PCGF1  | 84759  | 14249239 | AGAGUUGUAUUGUGAAGUA  |
| PCGF1  | 84759  | 14249239 | CCACUACUAUCGCUAUGAU  |
| PCGF1  | 84759  | 14249239 | UGUCACCGCUUGAUGCUIA  |
| TRIM3  | 10612  | 32454736 | GCACAUUAGAGCUAGUGUA  |
| TRIM3  | 10612  | 32454736 | GAGCGCCACUGCACACGAA  |
| TRIM3  | 10612  | 32454736 | GUACAGCACAGGCGGCAAA  |
| TRIM3  | 10612  | 32454736 | GAAUGAAAUUGUAGUAACG  |
| ZNF645 | 158506 | 22749188 | AAAGUUCGUCCUCAUAUUG  |
| ZNF645 | 158506 | 22749188 | GAGAAGACAUAGACGGUUAU |
| ZNF645 | 158506 | 22749188 | GCCAACACCUCGACUUAU   |
| ZNF645 | 158506 | 22749188 | UGACAAAGUCGGAUAUAAA  |
| RNF5   | 6048   | 34305290 | UCAAUGCCAUGAGCCUUU   |
| RNF5   | 6048   | 34305290 | GCAAGAGUGUCCAGUAUGU  |
| RNF5   | 6048   | 34305290 | GCGCGACCUUCGAAUGUAA  |
| RNF5   | 6048   | 34305290 | GGCCAUGUCUUAUCAGUG   |
| PHF15  | 23338  | 40556369 | GAAGAGAAGAGGCGAAAAU  |
| PHF15  | 23338  | 40556369 | GCUAUGACUUGGACGAGAU  |
| PHF15  | 23338  | 40556369 | GGGAGAGGGUGCAACGAGU  |
| PHF15  | 23338  | 40556369 | GGUGACAAGGCGGAGAGA   |



|         |        |          |                     |
|---------|--------|----------|---------------------|
| BRCA1   | 672    | 63252875 | CCAAAGCGAGCAAGAGAAU |
| BRCA1   | 672    | 63252875 | UGAUAAGCUCCAGCAGGA  |
| BRCA1   | 672    | 63252875 | CAACAUGCCCACAGAUCAA |
| BRCA1   | 672    | 63252875 | GAAGGAGCUUUCAUCAUUC |
| ZFAND6  | 54469  | 21359917 | CAAAGACAGAAUAGUAGUA |
| ZFAND6  | 54469  | 21359917 | GUGUAUGUAUAUAUCGCUU |
| ZFAND6  | 54469  | 21359917 | CAGAUUAUGUUCAUGGGUU |
| ZFAND6  | 54469  | 21359917 | UAUGGAAACCCUCGUACAA |
| SH3RF2  | 153769 | 47578102 | GCGGCCAGCUCCCUCAUUA |
| SH3RF2  | 153769 | 47578102 | GGACAGGUCAGCACUUAUC |
| SH3RF2  | 153769 | 47578102 | GCAAAGGCCUUAUGCAACU |
| SH3RF2  | 153769 | 47578102 | GGGCGGAGCAGCAUGAGAA |
| RNF150  | 57484  | 58331203 | UCGCAUGGCUCGUCUUUUA |
| RNF150  | 57484  | 58331203 | GACGUCAUCUUUACUACUA |
| RNF150  | 57484  | 58331203 | AAGCAGUGAUUCUGACAUI |
| RNF150  | 57484  | 58331203 | CCAAUGACGUUGUCCGGAU |
| PCGF3   | 10336  | 59710102 | GCACUUAGAUUCCCAUCGG |
| PCGF3   | 10336  | 59710102 | GUACAUCGGUCAUGACAGA |
| PCGF3   | 10336  | 59710102 | GGAGUUCUAUCACAAAUUG |
| PCGF3   | 10336  | 59710102 | GCGACCGUCUUGCAUCUGA |
| RNF8    | 9025   | 34304335 | GAGAUGGUCUGGAGGAUUC |
| RNF8    | 9025   | 34304335 | AGAAUGAGCUCCAUGUAU  |
| RNF8    | 9025   | 34304335 | GAGCGGUCUGGAACCUUU  |
| RNF8    | 9025   | 34304335 | CAACAAGAGUCUAAAUGGU |
| RNF38   | 152006 | 37577182 | GUAGUAUGCAUGUGUGAUU |
| RNF38   | 152006 | 37577182 | AAUCGUACUUGCCCAAUUU |
| RNF38   | 152006 | 37577182 | GCACUUACCAGUACCAUUA |
| RNF38   | 152006 | 37577182 | GAGUCAAGGCAGCUACUUA |
| TRIM15  | 89870  | 16445349 | GCGAGAACGAUGCCGAGUU |
| TRIM15  | 89870  | 16445349 | GGGAGAAACUUACUGCGAG |
| TRIM15  | 89870  | 16445349 | GCAGAACCACAGACGGCUU |
| TRIM15  | 89870  | 16445349 | CCCUGAAGGUGGUCCAUGA |
| IRF2BP1 | 26145  | 24308114 | CCUUCAAUAAACCGAAAGA |
| IRF2BP1 | 26145  | 24308114 | CAAGAAGGAUCACGGGCUG |
| IRF2BP1 | 26145  | 24308114 | CUUCAAGUACCUCGAAUAU |
| IRF2BP1 | 26145  | 24308114 | CCUGAAGAAUGUGGCCGAA |
| MLL2    | 8085   | 4505196  | GAUAUUAGCUACCACACAU |
| MLL2    | 8085   | 4505196  | GCAAAUCGCUAGCAUCAUU |
| MLL2    | 8085   | 4505196  | GCAUGAAGCCGCAGCAAUU |
| MLL2    | 8085   | 4505196  | GAAAGGGCACUGAGGGUAU |
| PARC    | 23113  | 63082031 | GGAUGACCCUGCCCACUGA |
| PARC    | 23113  | 63082031 | GGUGUGGCCUGUACCAGUA |
| PARC    | 23113  | 63082031 | GAACCAAGCAGCUCGUCUA |
| PARC    | 23113  | 63082031 | ACGCACAGCUCUAUAGCAA |
| HR      | 55806  | 70906481 | GGACAUACCAUGCCUGGCU |
| HR      | 55806  | 70906481 | CCAAGAACCUCUGUGUGGA |
| HR      | 55806  | 70906481 | CAUUACAGGAGGCCAAAUA |
| HR      | 55806  | 70906481 | CCAGAGAACGGCAUCGUGA |
| PHF23   | 79142  | 13236519 | GCAAGAAGCGGAAGUAAA  |
| PHF23   | 79142  | 13236519 | AAGAAGAGAUGGCAACAGU |
| PHF23   | 79142  | 13236519 | CGACAGUGCUACCUUGCUU |
| PHF23   | 79142  | 13236519 | AAACGGCGGAGAACAAUUG |
| RNF25   | 64320  | 34878786 | AGGCUGAGCGAAACCGUAU |
| RNF25   | 64320  | 34878786 | GGUCAAAUCAGCAAAGGUU |
| RNF25   | 64320  | 34878786 | GACCAGGAUUCACAGUAUG |
| RNF25   | 64320  | 34878786 | UGAGUCAGCUGUAGAUGUC |
| PHF13   | 148479 | 24432092 | GGGAGAGGUGUUCGGUUU  |
| PHF13   | 148479 | 24432092 | CCGUGGUAGCUGUGCGUUU |
| PHF13   | 148479 | 24432092 | ACUGAAGGCAAACGGACUA |
| PHF13   | 148479 | 24432092 | CAAACAGCCAGGACGCAUU |
| DTX3L   | 151636 | 31377615 | CCAAAGGAAUUGAGUAAGA |
| DTX3L   | 151636 | 31377615 | GCACCAUUGUGAUUACUUA |

|         |        |          |                      |
|---------|--------|----------|----------------------|
| DTX3L   | 151636 | 31377615 | GGACACCAUUAGUAACAAA  |
| DTX3L   | 151636 | 31377615 | GAAUACAGCGAACUGCAUA  |
| TNFAIP3 | 7128   | 26051241 | UCUGGUAGAUGAUUACUUU  |
| TNFAIP3 | 7128   | 26051241 | CAACGAAUGCUUUCAGUUC  |
| TNFAIP3 | 7128   | 26051241 | CUGCAGUACUUGCUUCAA   |
| TNFAIP3 | 7128   | 26051241 | CAACUCAUCUCAUCA AUGC |
| MKRN3   | 7681   | 74272285 | GGGGAGAACUGUCGCUAUU  |
| MKRN3   | 7681   | 74272285 | GUAGAAAAGCUGGGCGGAUG |
| MKRN3   | 7681   | 74272285 | AACCAUUCUUCUGUAUUA   |
| MKRN3   | 7681   | 74272285 | AUUAUGAGCUGGAAGAAUA  |
| PHF12   | 57649  | 75677337 | GAAAGACUGUCCAAUCACA  |
| PHF12   | 57649  | 75677337 | GCACUUAGCCACCCAAGCA  |
| PHF12   | 57649  | 75677337 | GGGAUUAGCACCCAGAAUU  |
| PHF12   | 57649  | 75677337 | CAACAGCCAACCAACGAUU  |
| MID1    | 4281   | 15451851 | GAACAAGUGUCUGACGAUU  |
| MID1    | 4281   | 15451851 | AGAAUGAUCAUGCGCGUUU  |
| MID1    | 4281   | 15451851 | UAACGGCUCUAUCGCCUUU  |
| MID1    | 4281   | 15451851 | CAUGAUAAACUUGACAGUAG |
| TRIM14  | 9830   | 15208664 | AACAGGGUCUGGAGUAUCA  |
| TRIM14  | 9830   | 15208664 | CAACAUAAACCCAGAUAGAA |
| TRIM14  | 9830   | 15208664 | GCCAAGAAAUUCAUUGAUA  |
| TRIM14  | 9830   | 15208664 | CAGAUUACUACUUGACGAA  |
| RUFY1   | 80230  | 22095370 | CAUCAGAUUAGCGACUAG   |
| RUFY1   | 80230  | 22095370 | GAACUUAACCGGCACUUGA  |
| RUFY1   | 80230  | 22095370 | AUAAACAUCUCUUAAGCGA  |
| RUFY1   | 80230  | 22095370 | GAAAGAUGACGAAGCGACA  |
| ZNF330  | 27309  | 13384595 | CCUAAAUGUGGGCAUGAAA  |
| ZNF330  | 27309  | 13384595 | GAUCGAAGCAAUUGAAGUA  |
| ZNF330  | 27309  | 13384595 | GCAAUAGGGUGUAGCGUUU  |
| ZNF330  | 27309  | 13384595 | GCUGAGAACCGCCGAGAAC  |
| RNF148  | 378925 | 37675276 | GAUCACAUCGGAAUUAGGA  |
| RNF148  | 378925 | 37675276 | CUACUUAGCUUCCUGACU   |
| RNF148  | 378925 | 37675276 | GAGGCGAAGUCAAAUAAAG  |
| RNF148  | 378925 | 37675276 | GCAUAGUUCUGUUUCAUCU  |
| VPS41   | 27072  | 18105060 | GAACGGUCUUGGAUGAACA  |
| VPS41   | 27072  | 18105060 | AGUCAUAGUUCAAGCAGUU  |
| VPS41   | 27072  | 18105060 | UGACAUAGCAGCACGCAAA  |
| VPS41   | 27072  | 18105060 | CAGCAUGUGUAUUUGCAUA  |
| UBE4B   | 10277  | 38327033 | GGACUUGAUUGGCCAGAUU  |
| UBE4B   | 10277  | 38327033 | GCAACUAGACACCGCGAAA  |
| UBE4B   | 10277  | 38327033 | CAAGAACGCACGCGCAGAA  |
| UBE4B   | 10277  | 38327033 | GCUAAACACUGGCUCCAAU  |
| CCL20   | 6364   | 4759075  | CAAUGAAGGCUGUGACAUC  |
| CCL20   | 6364   | 4759075  | GCUAUCAUCUUUCACACAA  |
| CCL20   | 6364   | 4759075  | CCGUUUUCUUCAUCCUAAA  |
| CCL20   | 6364   | 4759075  | UGAAAUAUAUUGUGCGUCU  |
| RNF141  | 50862  | 38045936 | UGUCAGAAGUGUAUUUGAUA |
| RNF141  | 50862  | 38045936 | UUAAUGAUGUAACGGCUAA  |
| RNF141  | 50862  | 38045936 | AAGAUGAUAUGGCUAACUA  |
| RNF141  | 50862  | 38045936 | GAUCAGACACAGUUGGUUA  |
| WHSC1L1 | 54904  | 13699812 | GCUUGAGGUUCAUACUAAA  |
| WHSC1L1 | 54904  | 13699812 | GUCCACUGGUGUUAAGUUU  |
| WHSC1L1 | 54904  | 13699812 | GGUUGACACUGUAUCAGAA  |
| WHSC1L1 | 54904  | 13699812 | GAACGUGCUCAGUGGGUAU  |
| MARCH2  | 51257  | 53729333 | CCAGAAAGUUCGCCUGAAG  |
| MARCH2  | 51257  | 53729333 | GGAGACACCAGUAUGAAUG  |
| MARCH2  | 51257  | 53729333 | UGGCUUCCUCAUCUAACA   |
| MARCH2  | 51257  | 53729333 | GAUGGUCCUUUCUGCCGGA  |
| NDP52   | 10241  | 33519473 | GGACGUCACAUGUCAUUUAU |
| NDP52   | 10241  | 33519473 | GGAAGACAACCCGUGAGUA  |
| NDP52   | 10241  | 33519473 | GGAAACCAUAUUCUGGUA   |
| NDP52   | 10241  | 33519473 | GGAUUGGAUUGGCAUCUUU  |
| UBR2    | 23304  | 27597060 | GCGUAGGUCUGUUCGAUUAU |

|           |        |          |                      |
|-----------|--------|----------|----------------------|
| UBR2      | 23304  | 27597060 | CAACAGAGAUUACGCUUAC  |
| UBR2      | 23304  | 27597060 | UCAGAGAUCAACUGUAUUA  |
| UBR2      | 23304  | 27597060 | GCUUAGUGAUUCCAAAUA   |
| TRIM2     | 23321  | 15011942 | GGUCAACUAUGGCCUCAAA  |
| TRIM2     | 23321  | 15011942 | GCAAGAGUGUGCUGCUUAU  |
| TRIM2     | 23321  | 15011942 | GUAUAUGCCUGGAACGGUA  |
| TRIM2     | 23321  | 15011942 | CAACCAAUGUGUGCAGUA   |
| RNF103    | 7844   | 37595534 | GUUCAUGUGCCAAUAAAUA  |
| RNF103    | 7844   | 37595534 | UUACCAAUGUGGCGAUUUA  |
| RNF103    | 7844   | 37595534 | GCCAUUGUGUGGUAUGAAA  |
| RNF103    | 7844   | 37595534 | GAGCUUGGUUCUAGUAAU   |
| TRIML1    | 339976 | 31560863 | UCAGAGAGCCUGUGUGUAA  |
| TRIML1    | 339976 | 31560863 | CAGCAAUCAGAAGCCUAA   |
| TRIML1    | 339976 | 31560863 | ACACAACUAUUAAGACGAU  |
| TRIML1    | 339976 | 31560863 | GGACCUGUUCUCACUAAUA  |
| TOPORS    | 10210  | 40805103 | ACAAAUGGGAGUAUACUUA  |
| TOPORS    | 10210  | 40805103 | UUACUUAGAUCGCUGCUUA  |
| TOPORS    | 10210  | 40805103 | ACGAAAUGCUUCUGUGUAU  |
| TOPORS    | 10210  | 40805103 | UCAUGGAUCUUUAGUGAAU  |
| WHSC1     | 7468   | 6594682  | GGAGCAGGGCCUUGUCGAA  |
| WHSC1     | 7468   | 6594682  | CCGGGUGUUAAUGGAGAA   |
| WHSC1     | 7468   | 6594682  | GGUCCAAAGUGUCGGGUUA  |
| WHSC1     | 7468   | 6594682  | UGUCAGUGGAGGAGCGGAA  |
| TRIM17    | 51127  | 68160934 | GAGCGGAGAGAACGCAUUG  |
| TRIM17    | 51127  | 68160934 | GUGAAAAGGAUAGACACAGA |
| TRIM17    | 51127  | 68160934 | GCUAAGAGGCUUUCUAGAG  |
| TRIM17    | 51127  | 68160934 | GAGCAGAGCUUAGCCGAGU  |
| TRIM33    | 51592  | 74027250 | GAACAUAGGUAUCAGUUUU  |
| TRIM33    | 51592  | 74027250 | CCAGCAAGUUGGUGUAAUA  |
| TRIM33    | 51592  | 74027250 | GGACAAACCACAUUAGUAA  |
| TRIM33    | 51592  | 74027250 | GGAAAGCAGUUGCAUUGUA  |
| RC3H2     | 54542  | 9256536  | GGGAAAGGUUGGCGCUAAU  |
| RC3H2     | 54542  | 9256536  | CAGCUAAUCUCACGUAGUA  |
| RC3H2     | 54542  | 9256536  | CAGACAUCUUUGCGGGAAA  |
| RC3H2     | 54542  | 9256536  | CCCAAGGAAGUGCGACUAA  |
| LOC643904 | 643904 | 89041178 | CCGUGUGCUAUGAGAAGUU  |
| LOC643904 | 643904 | 89041178 | ACGUCACAUUCCUCAGCAA  |
| LOC643904 | 643904 | 89041178 | AGUCACAGAUCUUUGUCAU  |
| LOC643904 | 643904 | 89041178 | GGGUGCUGCUGGUGAGGAA  |
| TRIM40    | 135644 | 33469990 | CCACAGAAAUAAGAGGUUA  |
| TRIM40    | 135644 | 33469990 | GGAAAGGACGGCCAAGGAA  |
| TRIM40    | 135644 | 33469990 | GCUCAGAAGCCUGGUCAUU  |
| TRIM40    | 135644 | 33469990 | GGAGAAAGGAGUCAGUGAA  |
| RFPL2     | 10739  | 5730010  | GAGAAUCUGUUCACCGCAA  |
| RFPL2     | 10739  | 5730010  | GAGCGUAUCUGCUGAGGAG  |
| RFPL2     | 10739  | 5730010  | GAAGUGGGCGCAUCAGACA  |
| RFPL2     | 10739  | 5730010  | CUUCGUAGACCGCAAGUUA  |
| PHF16     | 9767   | 23110985 | AGGAACAGAUUCUUCGGUUU |
| PHF16     | 9767   | 23110985 | CUGCUGAGGUAUUCGGGAA  |
| PHF16     | 9767   | 23110985 | GGAUUGGAACCGAUCACGAA |
| PHF16     | 9767   | 23110985 | CAGUGACAGUUCAGACGAA  |
| TRIM22    | 10346  | 15208661 | GUAGAUGUGUCUGGAAAGA  |
| TRIM22    | 10346  | 15208661 | AGUGAAAGCUGGACAUUGA  |
| TRIM22    | 10346  | 15208661 | UAAACGAGGUGGUCAAGGA  |
| TRIM22    | 10346  | 15208661 | GUACGCACCUGCACAUUUA  |
| RNF31     | 55072  | 38045939 | GCCGAGAUGUGCUGCGAUU  |
| RNF31     | 55072  | 38045939 | GGCGUGGUGUCAAGUUUAA  |
| RNF31     | 55072  | 38045939 | GCAGAAUACUCAUCCAAGA  |
| RNF31     | 55072  | 38045939 | CCUAGAACCUGAUUCUUGCA |
| ZNRF4     | 148066 | 34222361 | CCGGAGCACUUAUUGCCUA  |
| ZNRF4     | 148066 | 34222361 | CAGCGAAGCGGGUGACCAU  |
| ZNRF4     | 148066 | 34222361 | GUAUACCACUGUCUCCUCA  |
| ZNRF4     | 148066 | 34222361 | GGUCGUAUCAGCCUUCUUU  |

|           |        |          |                      |
|-----------|--------|----------|----------------------|
| RNF166    | 115992 | 31343485 | GACACAAGUUCUCCUACGA  |
| RNF166    | 115992 | 31343485 | GUGAAGCACUGUGUGGAAA  |
| RNF166    | 115992 | 31343485 | GCAGCUCUCAUCCUACAAA  |
| RNF166    | 115992 | 31343485 | GGACUACAGUAUUGACGAG  |
| LOC649055 | 649055 | 89057653 | GUCGAAUAAUGAACGAUUA  |
| LOC649055 | 649055 | 89057653 | AGGAAUCUGUGAACCGACA  |
| LOC649055 | 649055 | 89057653 | GCAUGAACUCACUGCGAAA  |
| LOC649055 | 649055 | 89057653 | ACAAAGAGUAGGCGAUGAU  |
| RNF168    | 165918 | 31377565 | GACACUUUCUCCACAGUA   |
| RNF168    | 165918 | 31377565 | CAAAGUAAGGCCUGGUA    |
| RNF168    | 165918 | 31377565 | GAAAUCUCUCGUAACGU    |
| RNF168    | 165918 | 31377565 | AGAAGAACAGGACAGGUUA  |
| TRIM43    | 129868 | 20270352 | GCACAAUGGUUAAACUCUGA |
| TRIM43    | 129868 | 20270352 | GCACAGAUGAUCAGGAAUG  |
| TRIM43    | 129868 | 20270352 | GGACCCAUAAGGCAAACAAA |
| TRIM43    | 129868 | 20270352 | CCAGAGAAGUUGGGUCAAA  |
| RNF112    | 7732   | 23199981 | AGAGGGAGUUCGAGGAGUA  |
| RNF112    | 7732   | 23199981 | AUACAGACCUGGACUAUCU  |
| RNF112    | 7732   | 23199981 | AAACAGAGCUUCAUGGGAA  |
| RNF112    | 7732   | 23199981 | GAACCAAGGCCAUGCAAGC  |
| RAD18     | 56852  | 14550404 | GCUCUCUGAUCGUGAUUUA  |
| RAD18     | 56852  | 14550404 | GAAAUGAGUGGUUCUACAU  |
| RAD18     | 56852  | 14550404 | GGGAGCAGGUUAAUGGAUA  |
| RAD18     | 56852  | 14550404 | CCAAGAAACAAGCGUAAUA  |
| STUB1     | 10273  | 56181386 | CGCUGGUGGCCGUGUAUUA  |
| STUB1     | 10273  | 56181386 | GUGGAGGACUACUGAGGUU  |
| STUB1     | 10273  | 56181386 | UGGAAGAGUGCCAGCGAAA  |
| STUB1     | 10273  | 56181386 | GAAGGAGGUUAUUGACGCA  |
| MARCH6    | 10299  | 33589845 | ACGGAUUUCUGGCAAACAA  |
| MARCH6    | 10299  | 33589845 | CUAAGGAAUUUGAAUGAUC  |
| MARCH6    | 10299  | 33589845 | CAUACAAUGUCAUGCUCUA  |
| MARCH6    | 10299  | 33589845 | UCAUAGAUCUCGUCGCUUA  |
| BARD1     | 580    | 4557348  | UGGUUUAGCCCUCGAAGUA  |
| BARD1     | 580    | 4557348  | GAGCACAUCUUCUGUAGUA  |
| BARD1     | 580    | 4557348  | UCAGAUAUGUUGUGAGUAA  |
| BARD1     | 580    | 4557348  | CGACAUACCUUCUGUUGAA  |
| RCHY1     | 25898  | 58331198 | GCACUCUGCUUUAGAUUAUG |
| RCHY1     | 25898  | 58331198 | GAAAUGUAAUUUUGCCUA   |
| RCHY1     | 25898  | 58331198 | GCACAUUGUUUGGAGAAUA  |
| RCHY1     | 25898  | 58331198 | CUAGAUCGCUUUAAAGUGA  |
| TRIP      | 10293  | 40807468 | GCUCCGACUUCUUCGAUCA  |
| TRIP      | 10293  | 40807468 | ACGCAAUGCUACUGUGGUA  |
| TRIP      | 10293  | 40807468 | GCAAAGAUGUGGUAAGGAC  |
| TRIP      | 10293  | 40807468 | GCUGAGGAAGGAUUUGUUU  |
| LMO6      | 4007   | 7710128  | CCUUUAGCCAGCAGCGGAA  |
| LMO6      | 4007   | 7710128  | GCACAGAGUUAGCGCCAGC  |
| LMO6      | 4007   | 7710128  | CACUAGGAGGGCAGCGCUA  |
| LMO6      | 4007   | 7710128  | CGCAUCAUGUGUCGVCUAA  |
| TRIM52    | 84851  | 34147443 | GGGACAACGUAGACUAUUA  |
| TRIM52    | 84851  | 34147443 | GCAAGGCCUAUAAUCAGUA  |
| TRIM52    | 84851  | 34147443 | GAAUUGAUGUCUACCGAGA  |
| TRIM52    | 84851  | 34147443 | GGUGGGAAUACUUCAGUA   |
| CBLC      | 23624  | 20149595 | GGCCAACACUCCUCAAGAA  |
| CBLC      | 23624  | 20149595 | GCAACAAGGAUGUGAAGAU  |
| CBLC      | 23624  | 20149595 | GAACAGCAGUGACCAGGAA  |
| CBLC      | 23624  | 20149595 | CAUUUGAGCUCUGCAAGAU  |
| RNF44     | 22838  | 42718018 | ACAAGUGGUUGAAGGCCAA  |
| RNF44     | 22838  | 42718018 | GCACAUCCCUGGCUGCAGU  |
| RNF44     | 22838  | 42718018 | CCUUUGGUGUGCCAUAUUC  |
| RNF44     | 22838  | 42718018 | CAGCAGAGCCCGUUCUUGG  |
| MLL3      | 58508  | 10864040 | CCAGGUCAAUCAACAGUUA  |
| MLL3      | 58508  | 10864040 | CAAAGCAUUUCAUCAGUA   |
| MLL3      | 58508  | 10864040 | GCAGUUACCAGAUACUUA   |

|        |        |          |                      |
|--------|--------|----------|----------------------|
| MLL3   | 58508  | 10864040 | GCAAUGGUCUUUCUGGAUA  |
| RNF149 | 284996 | 31543079 | GCUAGAAGCCGGCAGGAGU  |
| RNF149 | 284996 | 31543079 | GAGUCUAGCUUUACCAGAU  |
| RNF149 | 284996 | 31543079 | UAUACUGGCUCUCAGAUUG  |
| RNF149 | 284996 | 31543079 | CAUGAUGAUUAUCUCGUUA  |
| TRIM37 | 4591   | 52487175 | AGAGUGAGUUGAUUAUCUAA |
| TRIM37 | 4591   | 52487175 | GAAUGUAGAAGCUGUAAGA  |
| TRIM37 | 4591   | 52487175 | AUACGAAACUCCACAAAUA  |
| TRIM37 | 4591   | 52487175 | GGACUUUGCUGGAGGUUAA  |
| BIRC7  | 79444  | 21536419 | GGAGAGAGGUCCAGUCUGA  |
| BIRC7  | 79444  | 21536419 | GGAAGAACCGGAAGACGCA  |
| BIRC7  | 79444  | 21536419 | GCUCUGAGGAGUUGCGUCU  |
| BIRC7  | 79444  | 21536419 | GGAAGAGACUUUGUCCACA  |
| CBLB   | 868    | 54112419 | GGUCGAAUUUUGGGUAUUA  |
| CBLB   | 868    | 54112419 | UAUCAGCAUUUACGACUUA  |
| CBLB   | 868    | 54112419 | GUACUGGUCCGUUAGCAA   |
| CBLB   | 868    | 54112419 | GAACAUCACAGGACUAUGA  |
| RNF6   | 6049   | 34305296 | GCGGUUAGAUGGCGUCAAG  |
| RNF6   | 6049   | 34305296 | GAGAGACCAUAAUCUUUUA  |
| RNF6   | 6049   | 34305296 | GAAUCAGUCUAGAUCGAGA  |
| RNF6   | 6049   | 34305296 | GGAACGAAUUACAGAGACU  |
| RNF144 | 9781   | 38045937 | GACCAGUGCUGCUUUCAAA  |
| RNF144 | 9781   | 38045937 | GUGCAAAGCCUGCCGUAUG  |
| RNF144 | 9781   | 38045937 | GAACGAGAUUGAGUGCAUG  |
| RNF144 | 9781   | 38045937 | GCAAUUAGCUGCCCAGAUG  |
| LONRF1 | 91694  | 40217795 | GGAAAGCGUUUAGGGUUU   |
| LONRF1 | 91694  | 40217795 | GUUUAGAUCAUGCACCAUA  |
| LONRF1 | 91694  | 40217795 | GAUACCAGCUGUCGGUUUU  |
| LONRF1 | 91694  | 40217795 | GAAGGUCUGUGGUUGAUAC  |
| TRIM55 | 84675  | 34878851 | GAAAUGUGCCAGUGAUUU   |
| TRIM55 | 84675  | 34878851 | GAGCAGCAGACCAUGGAUA  |
| TRIM55 | 84675  | 34878851 | UGGUUGAACUCCUAAAUG   |
| TRIM55 | 84675  | 34878851 | GCGCAUCUCUGAAUUACAA  |
| BRPF3  | 27154  | 55742814 | AGGCAGAGAACAUCGGCUA  |
| BRPF3  | 27154  | 55742814 | GCAUCGAGGAAGAGCGCCA  |
| BRPF3  | 27154  | 55742814 | GUAUAAUGC UAAAGACACA |
| BRPF3  | 27154  | 55742814 | UGAUUGAGCUGAUUCGGAA  |
| RFFL   | 117584 | 62865648 | CAUGACAUCUCUACCGAAA  |
| RFFL   | 117584 | 62865648 | GAGGAGAACCUGUGUAAGA  |
| RFFL   | 117584 | 62865648 | CCUGAGAGCUUGCAUCGGU  |
| RFFL   | 117584 | 62865648 | GGACUCACCCAUUGACUGU  |
| LRSAM1 | 90678  | 53729362 | CAGAUCAGGAGCCAGAUUA  |
| LRSAM1 | 90678  | 53729362 | GAACGAUUCCAGCAGAUUC  |
| LRSAM1 | 90678  | 53729362 | UGACGGAGUUAGAAGCCAA  |
| LRSAM1 | 90678  | 53729362 | GCAGAUGACAUUCUCGACA  |
| RNF139 | 11236  | 38045935 | GGGAGCCGCUUACAAGAAA  |
| RNF139 | 11236  | 38045935 | UGACAGGCGUCUUGGCUUU  |
| RNF139 | 11236  | 38045935 | AGAGAGACUUUACUGUUUA  |
| RNF139 | 11236  | 38045935 | GGGAAAAGCUUGACGAUUA  |
| RAPSN  | 5913   | 38045927 | GAGAAGCUGUGCGAGUUUC  |
| RAPSN  | 5913   | 38045927 | UGUCUGAGCGAGAGCAUUU  |
| RAPSN  | 5913   | 38045927 | GGGCGCACGUUGUGAGGUU  |
| RAPSN  | 5913   | 38045927 | CAUUGCAGGUGUGGACAAA  |
| PJA1   | 64219  | 74048536 | AAACUGCCCUUGCGCACUU  |
| PJA1   | 64219  | 74048536 | GACGAUAUGCCACACAGUA  |
| PJA1   | 64219  | 74048536 | CGACGAAGACUCUGACAGU  |
| PJA1   | 64219  | 74048536 | GGACGCACAGUGAUGAUUA  |
| RKHD2  | 51320  | 39545576 | GGAGUGAUCCUUCUGGUAA  |
| RKHD2  | 51320  | 39545576 | GAAACUAUAUAGAGCUCAA  |
| RKHD2  | 51320  | 39545576 | GCGCAAGAAUGAUAUCCAA  |
| RKHD2  | 51320  | 39545576 | CUAAUGGUACCAAUAGUUA  |
| DPF1   | 8193   | 4758797  | AGGAAAAGGCUUCUGCUUA  |
| DPF1   | 8193   | 4758797  | GGCCAAAGGAAAGGCAUUA  |

|           |        |           |                      |
|-----------|--------|-----------|----------------------|
| DPF1      | 8193   | 4758797   | CAAGAUCGACUGUGAAGCA  |
| DPF1      | 8193   | 4758797   | CGGGACAGAUUUACACGUA  |
| UBE4A     | 9354   | 38327028  | GAUAAUAGCGUGUCAGAGA  |
| UBE4A     | 9354   | 38327028  | GCAGAUAAACCUGGGUGAUU |
| UBE4A     | 9354   | 38327028  | GCCAAUAGAGCUAACCUUU  |
| UBE4A     | 9354   | 38327028  | CCAGGCAACCACUUAUUUA  |
| DTX3      | 196403 | 31341899  | CGAAUGUCAUCACCUGGAA  |
| DTX3      | 196403 | 31341899  | GGAGUUCGGUAUCCUGGCA  |
| DTX3      | 196403 | 31341899  | GGCGGAUGCUGGUCUCUAA  |
| DTX3      | 196403 | 31341899  | CCUCAUAGAUGGCGAGACU  |
| AMFR      | 267    | 21071002  | GCAAGGAUCGAUUUGAAUA  |
| AMFR      | 267    | 21071002  | GGACGUAUGUCUAUUACAC  |
| AMFR      | 267    | 21071002  | GUAAAUACCGCUUGCUGUG  |
| AMFR      | 267    | 21071002  | GAAUUCGUCGGCACAAGAA  |
|           |        |           |                      |
| SCEL      | 8796   | 21536305  | GCAGAUACAUCCACCUAAA  |
| SCEL      | 8796   | 21536305  | GGAAGUCCGAUUAAGUUA   |
| SCEL      | 8796   | 21536305  | UCUCGAAUCUGUUGCUIAAA |
| SCEL      | 8796   | 21536305  | GAUAACCAACUAACCAAUA  |
| MARCH5    | 54708  | 58532582  | GAAUAAUGGUCGGCUCUAU  |
| MARCH5    | 54708  | 58532582  | GCGCAAAUACUCGAAUAAA  |
| MARCH5    | 54708  | 58532582  | GCUGAAUACCUAAUAGUUU  |
| MARCH5    | 54708  | 58532582  | GUAAAUUGAUGUUCAGUAG  |
| LOC652591 | 652591 | 89071835  | CUCCAAUGCAACCGGGAAU  |
| LOC652591 | 652591 | 89071835  | GGAACUACUUAACGGACAC  |
| LOC652591 | 652591 | 89071835  | AGGGAGCUCUGUUGCUIUA  |
| LOC652591 | 652591 | 89071835  | CUGUCCUGUGUGUGGGAAA  |
| MAP3K1    | 4214   | 51464911  | GUGGAGAUCUCAUGAUUUC  |
| MAP3K1    | 4214   | 51464911  | ACAUUUGUCUCCUGGUUUA  |
| MAP3K1    | 4214   | 51464911  | GACUAAGAAUUGCAGAUUU  |
| MAP3K1    | 4214   | 51464911  | GAUUAGAUGUCAAUACAGA  |
| C1orf164  | 55182  | 46397374  | CGGAAUGACAGAUGUAAGA  |
| C1orf164  | 55182  | 46397374  | GGACGUGCAUAUUCUUC    |
| C1orf164  | 55182  | 46397374  | CAACGGUUCUUAUACCUUU  |
| C1orf164  | 55182  | 46397374  | CCAAGCGACUUAAGAACUG  |
| LOC120824 | 120824 | 89033943  | UCAUAAGAUGGUUGCAUUU  |
| LOC120824 | 120824 | 89033943  | CUCAAGGGAUUCAGAGUUU  |
| LOC120824 | 120824 | 89033943  | GGAUAGAAGUCCCUGAUA   |
| LOC120824 | 120824 | 89033943  | GCAAGAGCCAGUAGUCAUA  |
| LOC441061 | 441061 | 88987268  | GGAUAGACACACUGCCGCA  |
| LOC441061 | 441061 | 88987268  | GUGAUGGGUCAGUUCGGUA  |
| LOC441061 | 441061 | 88987268  | CAUUGACAGCUCUGCGGAA  |
| LOC441061 | 441061 | 88987268  | UCAGUGUGGCUAUGUGUUA  |
| M96       | 22823  | 6678763   | CUUAGCAGAUCAGGAGUUA  |
| M96       | 22823  | 6678763   | GAACUUGAGCUUAUGACAU  |
| M96       | 22823  | 6678763   | GUAAUUCACUGGUCCACAA  |
| M96       | 22823  | 6678763   | CCAAUGAAAUGGUUAUAUG  |
| RNF40     | 9810   | 37588854  | CUACGCAGAUGCCGACGAA  |
| RNF40     | 9810   | 37588854  | GAACUCCGAGAACGAAUUG  |
| RNF40     | 9810   | 37588854  | GAGAUJCGCCACCUGAUUA  |
| RNF40     | 9810   | 37588854  | GCUUAAACUCUGGCUACUUA |
| RNF20     | 56254  | 34878776  | CAGAAGAAGCUACAUGAUU  |
| RNF20     | 56254  | 34878776  | GUAUCAUCCUUAACGUUA   |
| RNF20     | 56254  | 34878776  | UAUCAAUUGCUCGGAAGUUU |
| RNF20     | 56254  | 34878776  | GCUAAACAGUGGAGAUAAU  |
| PHF14     | 9678   | 55769549  | UCGUAAACUUAUGCGGAAA  |
| PHF14     | 9678   | 55769549  | CCAGUAACACUAACGGAAA  |
| PHF14     | 9678   | 55769549  | CCGAUAAGAAACACGAGAA  |
| PHF14     | 9678   | 55769549  | GGAGUGAUGAAGACGAGAA  |
| LOC729974 | 729974 | 113428354 | CAUUAGAUGUCCUGUCUGU  |
| LOC729974 | 729974 | 113428354 | GGUAUGAGGUCCAUUGCCU  |
| LOC729974 | 729974 | 113428354 | ACAUCAAGCCCAAGUACAA  |
| LOC729974 | 729974 | 113428354 | GGGAUGUGGGCGUGUGCAA  |

|          |        |          |                      |
|----------|--------|----------|----------------------|
| RNF157   | 114804 | 58743364 | UGAGAAGCCUGGUCAAUAU  |
| RNF157   | 114804 | 58743364 | CCAGAGGACGUGCGCAUUU  |
| RNF157   | 114804 | 58743364 | AGAGGGAAAUGAUGUUAUA  |
| RNF157   | 114804 | 58743364 | GUACAACACACAAGAUUCU  |
| LOC51255 | 51255  | 75709223 | CCAUUGAGAUGCCUUGCCA  |
| LOC51255 | 51255  | 75709223 | GCAAGGUCACUUUUCAAUA  |
| LOC51255 | 51255  | 75709223 | CGUCCUAUUUCGAUGAACA  |
| LOC51255 | 51255  | 75709223 | UGGCUAAGCAAGACAAAUU  |
| ZNF547   | 284306 | 38044285 | GCAAAGCAGUGCAGUGAAU  |
| ZNF547   | 284306 | 38044285 | GGAAGACCGACAUUUGUGA  |
| ZNF547   | 284306 | 38044285 | CCACAAACAUA AACUUUCU |
| ZNF547   | 284306 | 38044285 | GGAAAUUGUUUAUGUGGAG  |
| SHPRH    | 257218 | 27436872 | GAAAUCACAUUAUCAAGGU  |
| SHPRH    | 257218 | 27436872 | GCCAGAAGCUAGUAAGAGA  |
| SHPRH    | 257218 | 27436872 | GCACAAAUCAGUCGUGUUA  |
| SHPRH    | 257218 | 27436872 | AAAGAAAUCUCGUAUGUCU  |
| KIAA1542 | 57661  | 55741656 | GAGCUCAAUUUGGUGGUA   |
| KIAA1542 | 57661  | 55741656 | GUGGAGAGCAUCUUUGGUA  |
| KIAA1542 | 57661  | 55741656 | GUUGAUCGAACUCUAUUUA  |
| KIAA1542 | 57661  | 55741656 | GGACACGUCUUUGAUGAUU  |
| UHRF2    | 115426 | 23312363 | CUACACAGAUUGAGGCUAA  |
| UHRF2    | 115426 | 23312363 | GCAGGUUACCCUUCAGUAU  |
| UHRF2    | 115426 | 23312363 | GAUCUUAGACCACGAGCUA  |
| UHRF2    | 115426 | 23312363 | GGAGCAGAGUCUCGGAAUU  |
| TRIM35   | 23087  | 70608107 | UUGAUAAGCUUCGCGAGUU  |
| TRIM35   | 23087  | 70608107 | UGUGGAAUCUGUACCCUUC  |
| TRIM35   | 23087  | 70608107 | AGGGCGAGCUGUCUUUCUA  |
| TRIM35   | 23087  | 70608107 | GAAGGAGGACGACGUUUCU  |
| CNOT4    | 4850   | 56550058 | CGUCUUUGUUGUAGGUUUA  |
| CNOT4    | 4850   | 56550058 | CCAAUUCUCUCAAUAGUAC  |
| CNOT4    | 4850   | 56550058 | UAACAGAGUCACAGUCGUU  |
| CNOT4    | 4850   | 56550058 | GGUAGUAGAUGGCAGAACA  |
| RFPL3    | 10738  | 5730012  | GGAAUUUUCUACUUGGUA   |
| RFPL3    | 10738  | 5730012  | GAUAUGGGACAUUUCUAUA  |
| RFPL3    | 10738  | 5730012  | AUUCGAUUAUUGAGUCGUA  |
| RFPL3    | 10738  | 5730012  | GAAAUGUUCUGUAUUCUCG  |
| CHD4     | 1108   | 51599155 | GAGCGGCAGUUCUUUGUGA  |
| CHD4     | 1108   | 51599155 | GAAUAAAUUUCUAGCUCGA  |
| CHD4     | 1108   | 51599155 | GGUGUUAUGUCUUUGAUUC  |
| CHD4     | 1108   | 51599155 | AAGAAGAUCUAGCCCGAAA  |
| RNF34    | 80196  | 37595536 | UCUGAGAAAUAUACCCAUA  |
| RNF34    | 80196  | 37595536 | GGCCCAACAUAUUUGUAA   |
| RNF34    | 80196  | 37595536 | GCUUAUGGAUGGAGACCAA  |
| RNF34    | 80196  | 37595536 | CGGCACAGGUACAAAGUGA  |
| TRIM64   | 120146 | 89034199 | GACAUCGAGAGGAGUGUAA  |
| TRIM64   | 120146 | 89034199 | UGUGGUUAUGAAUGGGUAU  |
| TRIM64   | 120146 | 89034199 | GGAUGAUUGUGGCAAGUUA  |
| TRIM64   | 120146 | 89034199 | UCAGUAAGGAAGAGGAUAA  |
| ZNF185   | 7739   | 6005971  | GGGCAGAAGUGUAGGGUUC  |
| ZNF185   | 7739   | 6005971  | CGAGAGAGUUGUGGCAGUA  |
| ZNF185   | 7739   | 6005971  | GUACGUGAAUGCUAGUGAA  |
| ZNF185   | 7739   | 6005971  | GCUGAUGACUCGUGGACAA  |
| SMARCA3  | 6596   | 21071053 | GCAGGAUCUUCUAAGGUUA  |
| SMARCA3  | 6596   | 21071053 | GAUAGAGAAUGGUGGCAUA  |
| SMARCA3  | 6596   | 21071053 | CCAGAUGACUUUCUAACUA  |
| SMARCA3  | 6596   | 21071053 | GGAUUUGUGUUUACUCGUU  |
| DTX2     | 113878 | 24308252 | GAUACAGCGAUGUGACUGA  |
| DTX2     | 113878 | 24308252 | GGACCAUCCUCAUAGUUUA  |
| DTX2     | 113878 | 24308252 | UGACCAACCUCUGCAUA    |
| DTX2     | 113878 | 24308252 | GUAUUACGGUCCAGAUUGU  |
| MIB1     | 57534  | 62868229 | CAGCAUACCCAGAUUGUUA  |
| MIB1     | 57534  | 62868229 | CGACAGACACCACUUCAUA  |
| MIB1     | 57534  | 62868229 | GGUAUGCUCUGACAAGAAA  |

|           |        |           |                      |
|-----------|--------|-----------|----------------------|
| MIB1      | 57534  | 62868229  | GACCUGAGCAUUCGAAAUA  |
| TRIM56    | 81844  | 30794215  | GCGACUCCUGGCCUGUAA   |
| TRIM56    | 81844  | 30794215  | GCAGAAUAGUGUGGUAUC   |
| TRIM56    | 81844  | 30794215  | ACGUGGAGGUGUACAAUUA  |
| TRIM56    | 81844  | 30794215  | GCGCACGGCUCUAUCUCAU  |
| RNF167    | 26001  | 14149701  | GGAAACGGCUCCAGCGGAA  |
| RNF167    | 26001  | 14149701  | CCAAUGAACUUCUGAACAU  |
| RNF167    | 26001  | 14149701  | GUA AUGAUAGCUCGUUGUA |
| RNF167    | 26001  | 14149701  | GGUCA AUGGGUCAGUCUUU |
| LONRF2    | 164832 | 38348241  | AGACAAACUUUCGGAAUUA  |
| LONRF2    | 164832 | 38348241  | GAUGCAUGCUGGAGAUUAA  |
| LONRF2    | 164832 | 38348241  | CGACGGAUUAUAGUCAUCA  |
| LONRF2    | 164832 | 38348241  | GAUAAGAAGAUGCAUGGAA  |
| LOC642446 | 642446 | 169203567 | GGACUGCAGAUGCCAAUUU  |
| LOC642446 | 642446 | 169203567 | AAAGUUGGUUUCACGAUGA  |
| LOC642446 | 642446 | 169203567 | UAAGACACUAUGUGCGAGA  |
| LOC642446 | 642446 | 169203567 | GCAAAGGCCUCUGGGUCGA  |
| RFWD3     | 55159  | 71143111  | GGGCAUCUCUUUGGGUAUA  |
| RFWD3     | 55159  | 71143111  | GGACCUACUUGCAAACUUA  |
| RFWD3     | 55159  | 71143111  | GCAGUCAUGUGCAGGAGUU  |
| RFWD3     | 55159  | 71143111  | GUUAAGAUGUUGAGUACUG  |
| LOC642219 | 642219 | 89035027  | GCAAAUAUCACCGUCGUUA  |
| LOC642219 | 642219 | 89035027  | GCACAUUUCAUUCGUUAAA  |
| LOC642219 | 642219 | 89035027  | AAAGUUGGUUUCACGAUGA  |
| LOC642219 | 642219 | 89035027  | UAAGACACUAUGUGCGAGA  |
| RNF151    | 146310 | 51473159  | GACGCUGGCUGCAUAGUGA  |
| RNF151    | 146310 | 51473159  | GGGCCAACAUACCUUGUAA  |
| RNF151    | 146310 | 51473159  | GAAGUCAAGUGCAAGAACG  |
| RNF151    | 146310 | 51473159  | GGUAUGAUCUCAACCUUU   |
| WDR59     | 79726  | 58331265  | GAGCGGAAAUCAAGACGAU  |
| WDR59     | 79726  | 58331265  | AAACGUGGUUGUAGAGUUC  |
| WDR59     | 79726  | 58331265  | CAUAUUAGAUGGUGUUGAU  |
| WDR59     | 79726  | 58331265  | GAGCUGAAGUGUUGAAGUU  |
| VPS11     | 55823  | 62865896  | UAUUUGAGAUGGCGAUUAA  |
| VPS11     | 55823  | 62865896  | GAACGUCCAGUCCUAUAUA  |
| VPS11     | 55823  | 62865896  | UUUAGAGGCUACCUUAUCA  |
| VPS11     | 55823  | 62865896  | ACUCGAAUCUCCCUGCUA   |
| ZNF278    | 23598  | 14670363  | UGAGGUCGGUUAUCGAGAU  |
| ZNF278    | 23598  | 14670363  | GAACGGACAUAUCAAGCAG  |
| ZNF278    | 23598  | 14670363  | GGGUUGCGGUUCAAGAGAA  |
| ZNF278    | 23598  | 14670363  | GCAGGUGGCUUGUGAGAUC  |
| BRAP      | 8315   | 10800416  | GGAGAGAAAGUAGCGAUUA  |
| BRAP      | 8315   | 10800416  | CGACGUAAUUGAACAAAUG  |
| BRAP      | 8315   | 10800416  | GGUAUU AUGCACCUAUAUA |
| BRAP      | 8315   | 10800416  | UGAGAAGUGUGAUAAUCUA  |
| C13ORF7   | 79596  | 21362045  | GAACGAAGUGAUAAAGUAUA |
| C13ORF7   | 79596  | 21362045  | CAAAGGUUCUCUAACUAA   |
| C13ORF7   | 79596  | 21362045  | CGAAAUAGAUUGUUUACAG  |
| C13ORF7   | 79596  | 21362045  | GAUAACAGAUCACCUCAAA  |
| TRIM73    | 375593 | 65285120  | CAAGGAGUCCCUAAUGCUA  |
| TRIM73    | 375593 | 65285120  | GGAAGAUAGAGGAAAGUCA  |
| TRIM73    | 375593 | 65285120  | CUCCCAAGCAGCUGCCUAU  |
| TRIM73    | 375593 | 65285120  | CUACAGAAAUAUAGAGGA   |
| IBRDC2    | 255488 | 50284695  | GAAUAAACUUGGCCACUCA  |
| IBRDC2    | 255488 | 50284695  | GGUACUGCCUCCAGAACUU  |
| IBRDC2    | 255488 | 50284695  | GAGAUUGCCUGUUUGGUAC  |
| IBRDC2    | 255488 | 50284695  | CAGCUUGCCUGAAACAGUA  |
| PPIL2     | 23759  | 22547209  | GCAAGAAGCAUUAUUACGA  |
| PPIL2     | 23759  | 22547209  | GUACAUUACCUGUGCUGAA  |
| PPIL2     | 23759  | 22547209  | GUGCUGCGCUACCAGUUUG  |
| PPIL2     | 23759  | 22547209  | GGACCCGUCUUAUUUCUG   |
| ARIH2     | 10425  | 83776589  | CAAUACACCUACCCAUAUG  |
| ARIH2     | 10425  | 83776589  | GCAAGUUUCAGAGAUUAUG  |



|           |        |          |                       |
|-----------|--------|----------|-----------------------|
| ARIH2     | 10425  | 83776589 | GCAACGAGGUCUUCUGUUU   |
| ARIH2     | 10425  | 83776589 | GUAUGCAGUUUGUGCGAAA   |
| TIF1      | 8805   | 47419908 | GAGCAUAGAUACCAAUUUA   |
| TIF1      | 8805   | 47419908 | GAAGAACGCCAGUUGCUIA   |
| TIF1      | 8805   | 47419908 | UAACUGUGCCUGAUUAUUA   |
| TIF1      | 8805   | 47419908 | GAUCAUAGAUACACUAAUC   |
| TRAF3     | 7187   | 22027615 | UCAUUUACAGCGAGUGAUA   |
| TRAF3     | 7187   | 22027615 | AAGGAAAUGCUUCGAAAUA   |
| TRAF3     | 7187   | 22027615 | AAGAGAGCAUCGUUAAAAGA  |
| TRAF3     | 7187   | 22027615 | CGCUAAAAGCUGCACACUGA  |
| TRIM4     | 89122  | 15011940 | CCAAGUGGCUGUAAACCUA   |
| TRIM4     | 89122  | 15011940 | GGGAAUUACUGAUCGUUCA   |
| TRIM4     | 89122  | 15011940 | GCAUCUGGGCGAUUUUAUUG  |
| TRIM4     | 89122  | 15011940 | GGACCUGUUUCUUCAGAGA   |
| PCGF6     | 84108  | 37655164 | GCAAAGGUUACUUAUAGA    |
| PCGF6     | 84108  | 37655164 | GAGCAGUAUCAAAACUCUAA  |
| PCGF6     | 84108  | 37655164 | GCAAUAUAGUAGUACAUCA   |
| PCGF6     | 84108  | 37655164 | GAGGAGGAGCGCCUGAUUA   |
| TRIM31    | 11074  | 62865892 | GGAGAAGAAUUUCCUGCUA   |
| TRIM31    | 11074  | 62865892 | GGAAGAACGCAAUCAGGUU   |
| TRIM31    | 11074  | 62865892 | CCACAAAUCCCAUAAUGUC   |
| TRIM31    | 11074  | 62865892 | AAUUUGAACUCCUGCAUCA   |
| LOC652433 | 652433 | 89034678 | UCAUUAAGGAAGGUGAUAA   |
| LOC652433 | 652433 | 89034678 | GCAGAUACCAAUAUAGUUA   |
| LOC652433 | 652433 | 89034678 | GGAAUGCAGGGUACAGAAA   |
| LOC652433 | 652433 | 89034678 | GUGGGAAAUUAUUCGGCAA   |
| ZNF650    | 130507 | 40255162 | AGAAAAGUCUUACGAAGUA   |
| ZNF650    | 130507 | 40255162 | AGGCAAACCUCUCUACAUI   |
| ZNF650    | 130507 | 40255162 | AGAUCGACCUACUGGAUUA   |
| ZNF650    | 130507 | 40255162 | GAGAAAAGCUCACCCAGUUA  |
| ISL1      | 3670   | 4504736  | GCUCCAAGGUGUAUCACAU   |
| ISL1      | 3670   | 4504736  | GGACCGGGCUCUAAUCCA    |
| ISL1      | 3670   | 4504736  | UGAAAUGUGCGGAGUGUAA   |
| ISL1      | 3670   | 4504736  | GCAGUGAAGUAGCAUCAAU   |
| VPS18     | 57617  | 42544225 | GACGUAAGGAUGACGCAA    |
| VPS18     | 57617  | 42544225 | GGGCGUAGCUUUGUUAUUG   |
| VPS18     | 57617  | 42544225 | CAAAGCAGCGAUUGACU     |
| VPS18     | 57617  | 42544225 | GCAAUCAGCUGUGCAUGAG   |
| PDZRN4    | 29951  | 39653318 | GCGAACACCUCUUAGUAGA   |
| PDZRN4    | 29951  | 39653318 | GGGAAGAUGUCCAGAAUCG   |
| PDZRN4    | 29951  | 39653318 | GAAAUCUGCAGUCGAGUAU   |
| PDZRN4    | 29951  | 39653318 | GAUGAAAAGCUUGCAGAAAUG |
| RNF215    | 200312 | 63025219 | CAGUGAUCGUCCUCAUUA    |
| RNF215    | 200312 | 63025219 | CAGUGGCAUACGUGGGCAA   |
| RNF215    | 200312 | 63025219 | GGUUGAGGGAAGAGCUAUC   |
| RNF215    | 200312 | 63025219 | GAGUAGGGAAGGUUUAAUA   |
| TRIM69    | 140691 | 88999602 | GUACAUGGUAUGGGAGGAA   |
| TRIM69    | 140691 | 88999602 | AGGAUAUGUUGGUGAGCAU   |
| TRIM69    | 140691 | 88999602 | CGUCUGGCAUGGUGACAUI   |
| TRIM69    | 140691 | 88999602 | UGACUAACAACCUCGACAA   |
| AIRE      | 326    | 4557294  | GAAGAAUGAGGACGAGUGU   |
| AIRE      | 326    | 4557294  | CAACAGUCCAGGAGGUGCA   |
| AIRE      | 326    | 4557294  | GUGCGGAGAUGGUACGGAC   |
| AIRE      | 326    | 4557294  | GUGCUGCGGUGUACUCACU   |
| PARK2     | 5071   | 7669539  | UUAAGAGCUCCAUCACU     |
| PARK2     | 5071   | 7669539  | GAUAGUGUUUGUCAGGUUC   |
| PARK2     | 5071   | 7669539  | GAACAUCACUUGCAUACG    |
| PARK2     | 5071   | 7669539  | GUAAAAGAAGCGUACCAUGA  |
| LMTK3     | 114783 | 51474756 | CACAGUCGCUGCCUGAUGU   |
| LMTK3     | 114783 | 51474756 | CUACUGGUAUGACAUUCU    |
| LMTK3     | 114783 | 51474756 | UCGAGUGGGCGGAGGAUUU   |
| LMTK3     | 114783 | 51474756 | GGGAGUGGCUGGUUUGGGA   |
| LOC390231 | 390231 | 89035024 | CACCUUGGAUCGUAAGUA    |

|           |        |           |                      |
|-----------|--------|-----------|----------------------|
| LOC390231 | 390231 | 89035024  | AAAUGUACUUCAACGCAU   |
| LOC390231 | 390231 | 89035024  | UUUAUAAAUUUGCGGAGCA  |
| LOC390231 | 390231 | 89035024  | AGGAUUUGGGAGACGUAUU  |
| LOC283116 | 283116 | 169202725 | CCAUCAGGCUUCAUUGUAU  |
| LOC283116 | 283116 | 169202725 | UGAACGAAAUGUGCCAUA   |
| LOC283116 | 283116 | 169202725 | AAUCUAUCCUUUGAGGUAA  |
| LOC283116 | 283116 | 169202725 | GCAUAUUACUCUGCAUCAU  |
| TRAF6     | 7189   | 22027628  | GCGCUUGCACCUUCAGUUA  |
| TRAF6     | 7189   | 22027628  | GGCCAUAAGGUUCUGCAAAG |
| TRAF6     | 7189   | 22027628  | GAUAUGAUGUAGAGUUUGA  |
| TRAF6     | 7189   | 22027628  | GGAGACAGGUUUCUUGUGA  |
| RNF2      | 6045   | 54792140  | CGAGAUACAUAAGACUUC   |
| RNF2      | 6045   | 54792140  | GUAUCUGGCUGUGAGGUUA  |
| RNF2      | 6045   | 54792140  | GGCAAUUGAUCCAGUAAUG  |
| RNF2      | 6045   | 54792140  | ACAAAGGAGUGUUUACAUC  |
| PXMP3     | 5828   | 4506342   | AUUUAAACCUGGGCUGUUA  |
| PXMP3     | 5828   | 4506342   | CAGAACGUCUCCUAGGUUA  |
| PXMP3     | 5828   | 4506342   | GAUAUCAGCCACCCAGUAA  |
| PXMP3     | 5828   | 4506342   | GAAGAACGAUGCUAUGAUU  |
| TRIM25    | 7706   | 68160936  | CGGAACAGUUAGUGGAUUU  |
| TRIM25    | 7706   | 68160936  | CAACAAGAAUACACGGAAA  |
| TRIM25    | 7706   | 68160936  | GCGGAUGACUGCAAACAGA  |
| TRIM25    | 7706   | 68160936  | GGGAUGAGUUCGAGUUUCU  |
| BIRC2     | 329    | 41349435  | UAUAGGACCUGGAGAUAGG  |
| BIRC2     | 329    | 41349435  | GAAAUGCUGCGGCCAACAU  |
| BIRC2     | 329    | 41349435  | GAAUGAAAGGCCAAGAGUU  |
| BIRC2     | 329    | 41349435  | UCGCAAUGAUGAUGUCAA   |
| BAZ2B     | 29994  | 7304922   | AGACAAUGUUUCCGAGAUU  |
| BAZ2B     | 29994  | 7304922   | CAGGAUGAGACGUCGGAAA  |
| BAZ2B     | 29994  | 7304922   | CCAAGUAAUCGAGAUUUU   |
| BAZ2B     | 29994  | 7304922   | CGACAAGAACAUGAUUUU   |
| RNF130    | 55819  | 38176162  | GUGCCGAAUUUGCCAUGUA  |
| RNF130    | 55819  | 38176162  | CAA AUGCACGCGACAGGAA |
| RNF130    | 55819  | 38176162  | UAACGUAGCAUUCGAUAUG  |
| RNF130    | 55819  | 38176162  | GUAGAAUGGUUUUGAAGAA  |
| TRAF5     | 7188   | 77404347  | GAUCAAGAUUAGCCGUUU   |
| TRAF5     | 7188   | 77404347  | GGUCACACCUGUCCCUAUA  |
| TRAF5     | 7188   | 77404347  | GAGCAAAGACUGUCCUUUA  |
| TRAF5     | 7188   | 77404347  | GCCAAGAACGCCUACAUAU  |
| PRICKLE2  | 166336 | 38524619  | GCGAUGAGCUGCUGCACAA  |
| PRICKLE2  | 166336 | 38524619  | CAAAGACUCUGGAAUGAAU  |
| PRICKLE2  | 166336 | 38524619  | CAGGAGAGCUACAGUGUAU  |
| PRICKLE2  | 166336 | 38524619  | GGAAGAGCCUACCAUUUAU  |
| LOC653978 | 653978 | 89065688  | UGUACAGGCUCAACCGCUU  |
| LOC653978 | 653978 | 89065688  | CAUGCAAUGCCUUCAAUUA  |
| LOC653978 | 653978 | 89065688  | CCAGAGAAGUUGGGUCAA   |
| LOC653978 | 653978 | 89065688  | CGGUUCUCCAUAAGGAAGA  |
| TRIM71    | 131405 | 84993741  | CACCAAGGCCACAGGCGAU  |
| TRIM71    | 131405 | 84993741  | CUUGGGAUGUGGCGGUGAA  |
| TRIM71    | 131405 | 84993741  | AGAAAAGUAGUGCUAGCCGA |
| TRIM71    | 131405 | 84993741  | GGAGGAGGGUAGAGCGCUA  |
| SH3MD4    | 344558 | 88953463  | CCGGAUAAUGUAGUCGGA   |
| SH3MD4    | 344558 | 88953463  | CCGCAAACCUCAACGGGGA  |
| SH3MD4    | 344558 | 88953463  | GAUGCAAACUAGACGAGAA  |
| SH3MD4    | 344558 | 88953463  | ACGUGUACCUGGCGCUCUA  |
| TTC3      | 7267   | 49640010  | CAAAGGGUCAUUAUCGUUA  |
| TTC3      | 7267   | 49640010  | UCAAAACAGUCCGUAAUA   |
| TTC3      | 7267   | 49640010  | GACCAUAGCAAUCGAAAUA  |
| TTC3      | 7267   | 49640010  | UAACUUGGCCACGAGUAA   |
| LONRF3    | 79836  | 73747832  | CCGAAAUGUCAUGGGUUU   |
| LONRF3    | 79836  | 73747832  | UGAAUGCGCUCUAUGUAUG  |
| LONRF3    | 79836  | 73747832  | AAAGAUGCCUAGAUCACAA  |
| LONRF3    | 79836  | 73747832  | GUGAGUGGAUUGCCGAAGA  |

|          |        |          |                      |
|----------|--------|----------|----------------------|
| DZIP3    | 9666   | 40254857 | GAUACAAGGUACCCAUGAA  |
| DZIP3    | 9666   | 40254857 | CCUAGAAUCACUUCAAUUA  |
| DZIP3    | 9666   | 40254857 | GGGAUAUCCUCCUUAGUGA  |
| DZIP3    | 9666   | 40254857 | GGGCUCAGCUGGCAAAGUA  |
| TNFRSF25 | 8718   | 23200030 | GAGAAGAUCUGCACCGUCC  |
| TNFRSF25 | 8718   | 23200030 | GGAAGGAGUUCGUGCGCAC  |
| TNFRSF25 | 8718   | 23200030 | GAUCGAAGCCGUGGAGGUG  |
| TNFRSF25 | 8718   | 23200030 | GCCGGUGACUCCACAAGA   |
| SPRYD5   | 84767  | 14249255 | GAAAGAGCCAAUAGUCAUA  |
| SPRYD5   | 84767  | 14249255 | GAGCAACAUCACUUGGAAA  |
| SPRYD5   | 84767  | 14249255 | UACCAGCACAGUAGGAUUA  |
| SPRYD5   | 84767  | 14249255 | GGACAGCCUCAGUGGAUUC  |
| UBR1     | 197131 | 83656781 | GGAAAUCAGCGCGGAGUUA  |
| UBR1     | 197131 | 83656781 | GAUCAGCAAACCCACAAUA  |
| UBR1     | 197131 | 83656781 | GUACAAUCGUGUGGACAUUA |
| UBR1     | 197131 | 83656781 | GCGAAGAAAUGGACUGUCU  |
| MLL4     | 9757   | 7662045  | GGGCGAGGCCUGUUCUGUA  |
| MLL4     | 9757   | 7662045  | GAAUCAAGUGCCCAACUA   |
| MLL4     | 9757   | 7662045  | AGACAUCUCUCCUUUAGUG  |
| MLL4     | 9757   | 7662045  | GCUAUGAAGACAACGACUA  |
| RNF113B  | 140432 | 37059780 | CGACCAAGCAGACCAGGUA  |
| RNF113B  | 140432 | 37059780 | GGAAUCCACAGCUACCUGA  |
| RNF113B  | 140432 | 37059780 | GAGGGUCGCUACUGUAUCU  |
| RNF113B  | 140432 | 37059780 | CCAAAGAACUGAUGGCGAA  |
| PHF1     | 5252   | 21536450 | CACAAGGACCGUUUCAUUU  |
| PHF1     | 5252   | 21536450 | CUGAUGGGCUGCUAUACUU  |
| PHF1     | 5252   | 21536450 | GAGGAUGAUUCGAGUUUC   |
| PHF1     | 5252   | 21536450 | GAAGCUUUCUCUGCCAUAU  |
| SH3MD2   | 57630  | 51988886 | GAUCGUAGGUUCUCGAAAU  |
| SH3MD2   | 57630  | 51988886 | GGAUGAAUCAGCCUUGUUG  |
| SH3MD2   | 57630  | 51988886 | AAAGGCACAUUACAACGUA  |
| SH3MD2   | 57630  | 51988886 | AAAGGGACAUCCAUGCAUA  |
| RING1    | 6015   | 51479191 | CUGGAGGGCGUCAGUGAAA  |
| RING1    | 6015   | 51479191 | GAACUGAGUCUGUAUGAGC  |
| RING1    | 6015   | 51479191 | UCUCUAAGAUCUAUCCUAG  |
| RING1    | 6015   | 51479191 | CGAGGUAUGUGAAGACAAC  |
| FSD1L    | 83856  | 89886461 | GCAGGAACAAGCUCGUAAA  |
| FSD1L    | 83856  | 89886461 | CAUUAGAUUAAAAGGAACC  |
| FSD1L    | 83856  | 89886461 | GGAAAAUUCGUCCAACAUA  |
| FSD1L    | 83856  | 89886461 | AGUCAGAUUAGUCAAUUGUA |
| RAG1     | 5896   | 4557840  | GAAAUGAGUCUGGUAACAA  |
| RAG1     | 5896   | 4557840  | GCAAUGCAGCUGAGUUCUA  |
| RAG1     | 5896   | 4557840  | CAGCUAAACCUUCAUUGA   |
| RAG1     | 5896   | 4557840  | GGAUGCAGUUUGUGAGUUA  |
| TRAF4    | 9618   | 22027623 | UGAUCUACCUGCACACUUG  |
| TRAF4    | 9618   | 22027623 | GAAACUAUGUGCGGGAUGA  |
| TRAF4    | 9618   | 22027623 | GGAGCUGGAAGUACAAGUA  |
| TRAF4    | 9618   | 22027623 | GUCAUCCCCUGCCCUAAUC  |
| CGRRF1   | 10668  | 50726998 | GUACCCAGAUCUCGCUAUC  |
| CGRRF1   | 10668  | 50726998 | GUUUUGGGAUGGUUUUGGUU |
| CGRRF1   | 10668  | 50726998 | GAGGAUGACCGGGAAAUUU  |
| CGRRF1   | 10668  | 50726998 | ACAGAUUGCCUUGAAGUA   |
| MSL2L1   | 55167  | 38570120 | CCAGUACACAUGAUGAUAA  |
| MSL2L1   | 55167  | 38570120 | CUGACUAGGUGUAAUGAAA  |
| MSL2L1   | 55167  | 38570120 | CGACCAAACUUUCCUAAUA  |
| MSL2L1   | 55167  | 38570120 | GCAUAUAGAUCACUUGUAU  |
| RNF138   | 51444  | 38045933 | AGCCAUAUCAUCUAAUGAA  |
| RNF138   | 51444  | 38045933 | GGGAAUAGGGAUAGACUUU  |
| RNF138   | 51444  | 38045933 | AAAGAGUGGUGUUUACUAU  |
| RNF138   | 51444  | 38045933 | GGAGGGAAUUGUAUUGAUA  |
| TRIM23   | 373    | 44955904 | GUAGAGUUGUCUUGGCAAA  |
| TRIM23   | 373    | 44955904 | CCCAUUUGAUCGACAAGUA  |

|           |        |          |                     |
|-----------|--------|----------|---------------------|
| TRIM23    | 373    | 44955904 | GUGCUAGAGUGUGGAGUUU |
| TRIM23    | 373    | 44955904 | GAAACUCUGUGUCGUCAAG |
| RNF10     | 9921   | 34452680 | GAUCCAAGCGUUUAAAUCG |
| RNF10     | 9921   | 34452680 | GCGCAUUUGUAGCCAUGAA |
| RNF10     | 9921   | 34452680 | CCACAGAGUCACAUCAGUA |
| RNF10     | 9921   | 34452680 | GUAAAUGUCCCAUCUGUUA |
| DPF3      | 8110   | 13442997 | AGGAUAUUCCCAAGCGAAA |
| DPF3      | 8110   | 13442997 | GGGAAGCAACAGUGGCGUA |
| DPF3      | 8110   | 13442997 | GGGCAUCGACUGUGUGCGA |
| DPF3      | 8110   | 13442997 | CGGGCCAGCUGUAUACAUA |
| RC3H1     | 149041 | 73695472 | UGCAAGAUGUGCCUGAAUA |
| RC3H1     | 149041 | 73695472 | ACCAACAGAUCGAGAGUUA |
| RC3H1     | 149041 | 73695472 | GCGAUUAGAUCUUCAGAGA |
| RC3H1     | 149041 | 73695472 | GAAGAGAUAUUCCGAGAAA |
| RNF128    | 79589  | 37588870 | GGUCAUAGAAGUAGGGAAA |
| RNF128    | 79589  | 37588870 | GUCAACAAAUGAAAGUCUA |
| RNF128    | 79589  | 37588870 | GCUCGAAGGCUACGGAAUG |
| RNF128    | 79589  | 37588870 | AGACGAAACUCCUAAUCAA |
| NSD1      | 64324  | 27477094 | GCCGAGAGCUGUUGAGAAA |
| NSD1      | 64324  | 27477094 | GAUCAAAGCCUUCAUCCAA |
| NSD1      | 64324  | 27477094 | GAACAGAAGUAGUACCAAU |
| NSD1      | 64324  | 27477094 | GGACGAGAAUUCUUUGAUU |
| RNF41     | 10193  | 37588860 | GACGUCAGCUGAACACAAA |
| RNF41     | 10193  | 37588860 | GAAGAGAUUAAGAGAACU  |
| RNF41     | 10193  | 37588860 | GGAGACAAUUGAAUACAAC |
| RNF41     | 10193  | 37588860 | GAUGAGCUGCCCAACCAUA |
| RNF190    | 162333 | 22749228 | UCAUUUAGGUUCCGAGAUG |
| RNF190    | 162333 | 22749228 | CCAAACAGAGUUCUAGUGA |
| RNF190    | 162333 | 22749228 | GAGCAGAGGUUUGCAGAAC |
| RNF190    | 162333 | 22749228 | GAGAGAGGUUGUCAAGAAA |
| CXXC1     | 30827  | 52856410 | AGAAGAAGGAGGAGCGAUA |
| CXXC1     | 30827  | 52856410 | GAGAUUCGCUAUCGGCACA |
| CXXC1     | 30827  | 52856410 | GCAGCAGAUCAAACGGUCA |
| CXXC1     | 30827  | 52856410 | UCACAGAAGUUAGGGCGCA |
| LOC196346 | 196346 | 89033947 | GCAUGAAGAUCUGGAGCCA |
| LOC196346 | 196346 | 89033947 | UGGAUAAGGAAGAAUAGUA |
| LOC196346 | 196346 | 89033947 | GCCUGAUAGUCUUUGCAUA |
| LOC196346 | 196346 | 89033947 | CCGACUGGCUCUUAAAUAU |
| TRIM28    | 10155  | 14971416 | GAAAUGUGAGCGUGUACUG |
| TRIM28    | 10155  | 14971416 | GCGAUCUGGUUAUGUGCAA |
| TRIM28    | 10155  | 14971416 | AGACAGCACUGGCGUGGUG |
| TRIM28    | 10155  | 14971416 | GAACGAGGCCUUCGGUGAC |
| HBXAP     | 51773  | 38788332 | GCUGGUAAAUGGAGAAGUU |
| HBXAP     | 51773  | 38788332 | AGGCAAAGUUCGAUGGACU |
| HBXAP     | 51773  | 38788332 | CUGUGACUCUUGCGAUA   |
| HBXAP     | 51773  | 38788332 | GAAGAAAGAGCGUGCCGAA |
| TRIM6     | 117854 | 51477693 | GUGAUUGGUUACAGCAUA  |
| TRIM6     | 117854 | 51477693 | CCACUACUCUUUGUCCAUA |
| TRIM6     | 117854 | 51477693 | GCAACUGUGUAAUUCUUAU |
| TRIM6     | 117854 | 51477693 | GGACCUACAUCUCUUUCA  |
| ANAPC11   | 51529  | 50409795 | GUCAAAACCUGAGUCAUGA |
| ANAPC11   | 51529  | 50409795 | UCUGCAGGAUGGCAUUUAA |
| ANAPC11   | 51529  | 50409795 | AAGAUUAAGUGCUGGAACG |
| ANAPC11   | 51529  | 50409795 | GGCCAACGAUGAGAACUGU |
| MARCH9    | 92979  | 53759067 | GAGGGUCACUACAGUCUGA |
| MARCH9    | 92979  | 53759067 | GCGCUGCGGUUAUACAAC  |
| MARCH9    | 92979  | 53759067 | GACCAAGGACAUAGGAGGA |
| MARCH9    | 92979  | 53759067 | GGAAGGUCCUAAAUAUGA  |
| MKRN2     | 23609  | 32880198 | UCACAUGACUUGGCAAACA |
| MKRN2     | 23609  | 32880198 | ACUGUGAGGUUCUUAAAUA |
| MKRN2     | 23609  | 32880198 | GGAAUCAUCAGAACCCUAA |
| MKRN2     | 23609  | 32880198 | GGACAAAGUGUGCAGUAUC |
| LOC51136  | 51136  | 21361528 | GAUAAACUCCAUACCUAAA |

|           |        |           |                      |
|-----------|--------|-----------|----------------------|
| LOC51136  | 51136  | 21361528  | AAUCUAAGGGUUACUGGUA  |
| LOC51136  | 51136  | 21361528  | GCGUCAAAACUUGUUAUGCA |
| LOC51136  | 51136  | 21361528  | AAUGCAAGCUCCAGAAAUA  |
| TRIM72    | 493829 | 56605980  | CAUGCAUGCGUAAGGAGAA  |
| TRIM72    | 493829 | 56605980  | GAGCAGACAUUGCGGCACU  |
| TRIM72    | 493829 | 56605980  | GGGAGGUGGAUGUUGGCGA  |
| TRIM72    | 493829 | 56605980  | CCAGAAUACUGACAAGCGU  |
| TRIAD3    | 54476  | 46370053  | GUGCGCAGAUGCUCACUUG  |
| TRIAD3    | 54476  | 46370053  | UACCGUACCUCUAUUGAAG  |
| TRIAD3    | 54476  | 46370053  | GAAAAUAAGCGACGACAUU  |
| TRIAD3    | 54476  | 46370053  | GAAAACAAAUGAACCAGUA  |
| KIAA0644  | 9865   | 76880479  | CCGCCAAGGAACUCGUUUA  |
| KIAA0644  | 9865   | 76880479  | GGCUGGAUCUAGACGGCAA  |
| KIAA0644  | 9865   | 76880479  | AGGCGGACCUCUUCGAAUU  |
| KIAA0644  | 9865   | 76880479  | CGUAGGAAACUGCGGGCUA  |
| LOC652859 | 652859 | 89065050  | AGGAACUUUAGUGAACAA   |
| LOC652859 | 652859 | 89065050  | GAAGGUUAGUACCGUAUUA  |
| LOC652859 | 652859 | 89065050  | AUGGGUGACUCUAAAAACA  |
| LOC652859 | 652859 | 89065050  | AAUGCAAGAAGACAAUACA  |
| ZNF294    | 26046  | 31657110  | GAUUGAAGGCUGGGAAUUA  |
| ZNF294    | 26046  | 31657110  | GCGAAAGGAUGCUUGCUGAA |
| ZNF294    | 26046  | 31657110  | AAACAACAAUGCUUCCAUA  |
| ZNF294    | 26046  | 31657110  | GGGUGUAUCUAACCUAUUA  |
| FLJ31951  | 153830 | 21389514  | UGACAAGUAUUGCGGAAUG  |
| FLJ31951  | 153830 | 21389514  | CAGAAUUGCUGUAGUUUA   |
| FLJ31951  | 153830 | 21389514  | UGGUUCAGCUUUAUCUAUA  |
| FLJ31951  | 153830 | 21389514  | GAGAAUUGGUUCAGGUAGU  |
| SYTL3     | 94120  | 58000458  | GAUCCCAAUGCUCUACUA   |
| SYTL3     | 94120  | 58000458  | UCAAGGAGUUAGAACGCGA  |
| SYTL3     | 94120  | 58000458  | GGUGGAAAGGAGCGAAGAA  |
| SYTL3     | 94120  | 58000458  | AGAAAUACGAAGACAGCGU  |
| JARID1D   | 8284   | 56243542  | ACAAGGAGAUGUUCAUUUAU |
| JARID1D   | 8284   | 56243542  | CAAAAUAGCUUACAACACA  |
| JARID1D   | 8284   | 56243542  | GUAGAAACGUUGAGAAUCU  |
| JARID1D   | 8284   | 56243542  | GGUUAUGGGUGCCAAGUAU  |
| LOC653192 | 653192 | 169163293 | UGUACAGGCUCAACCGCUU  |
| LOC653192 | 653192 | 169163293 | CUGUAACAACUCCUGGAUA  |
| LOC653192 | 653192 | 169163293 | CCAGAGAAGUUGGGUCAAA  |
| LOC653192 | 653192 | 169163293 | CCACAGAUGAUCAGGAUUA  |
| TRIM46    | 80128  | 47174858  | UGACAAAAGAGCCUGACAUA |
| TRIM46    | 80128  | 47174858  | GCGAAUACAGUGAAGAUGU  |
| TRIM46    | 80128  | 47174858  | GCCAACGCCUGGUAUGUCA  |
| TRIM46    | 80128  | 47174858  | GCUCAGGUCUGGUGGGCUA  |
| PHF3      | 23469  | 7662017   | CGAUAAGGAUCCUAUGCUA  |
| PHF3      | 23469  | 7662017   | CCACAGAUGCUCGGAAGAA  |
| PHF3      | 23469  | 7662017   | CAGCCGAAAUAGCGGACAA  |
| PHF3      | 23469  | 7662017   | GUAAGAAGUUUGCGACAGA  |
| RFPL1     | 5988   | 10440557  | GAGGAGCCACUGCACUUGU  |
| RFPL1     | 5988   | 10440557  | UAGGAACGCUCUACUCGGU  |
| RFPL1     | 5988   | 10440557  | UUGAGUAUCUGUCCUGUGA  |
| RFPL1     | 5988   | 10440557  | UGGAUGCGCUGUCUGCUUC  |
| RNF183    | 138065 | 34147709  | UCAACAACACGUUCCAUAU  |
| RNF183    | 138065 | 34147709  | GAGGGAGUGUUUCCGCAAC  |
| RNF183    | 138065 | 34147709  | GGUGAGUGCUGUCCCAGA   |
| RNF183    | 138065 | 34147709  | GCUCAUAUUCUCAUCUUU   |
| ZSWIM2    | 151112 | 71043931  | GUAUAACCACAACCUAAA   |
| ZSWIM2    | 151112 | 71043931  | GGGAAGUGUUUAAGUGUA   |
| ZSWIM2    | 151112 | 71043931  | CCGAAUGCAUAGAAUAUCA  |
| ZSWIM2    | 151112 | 71043931  | GAUCUUAGCUAAUUAUCAG  |
| ZNF216    | 7763   | 5174754   | CGAAACUGGUUAUAAGUAA  |
| ZNF216    | 7763   | 5174754   | GUGGCUGCCUUGCCUGUAA  |
| ZNF216    | 7763   | 5174754   | GCACAGAACUGCACUAGGA  |
| ZNF216    | 7763   | 5174754   | GCAAAUGACAGAAAUGAGC  |

|          |        |          |                      |
|----------|--------|----------|----------------------|
| PHF19    | 26147  | 58331162 | GAUCCAGGGACUCGGGACU  |
| PHF19    | 26147  | 58331162 | GGAAGUGUGGCCUGGGUUA  |
| PHF19    | 26147  | 58331162 | CCUCGUGACUUUCGAAGAU  |
| PHF19    | 26147  | 58331162 | GGGAAGAUCAAGAGGGUCA  |
| PDC      | 5132   | 32967589 | GAUGAAAACUGCCUUCGUA  |
| PDC      | 5132   | 32967589 | GCAGAAUACCCUAUAGUUA  |
| PDC      | 5132   | 32967589 | GGUAUUAAGGGUUGUGAUG  |
| PDC      | 5132   | 32967589 | GACAGUGUAUGCAGGAUUA  |
| DTX1     | 1840   | 41352717 | AGACUCAUCUUCACUAUCG  |
| DTX1     | 1840   | 41352717 | GUACUCCAAUGGCAACAAG  |
| DTX1     | 1840   | 41352717 | GCAUGGACGGCCUACGAUA  |
| DTX1     | 1840   | 41352717 | GAAGUUCACCGCAAGAGGA  |
| PHF10    | 55274  | 19747274 | GCGCAGUGAUGAAGUGAUU  |
| PHF10    | 55274  | 19747274 | ACUUAACCGGGAACGCAU   |
| PHF10    | 55274  | 19747274 | AAAGAACGUCAACGAAUUA  |
| PHF10    | 55274  | 19747274 | AAUAAAAGGCACUUCGGACA |
| TRIM45   | 80263  | 50878292 | GCACCGAGGAGUCUACUUA  |
| TRIM45   | 80263  | 50878292 | GGACAUACUACAUUCCUA   |
| TRIM45   | 80263  | 50878292 | GCUCAGAUCACAUAAUAA   |
| TRIM45   | 80263  | 50878292 | GUGCAGGGCUCGCCAUUCA  |
| TRIM32   | 22954  | 15208649 | UGGUAACUAUCGUAUACAA  |
| TRIM32   | 22954  | 15208649 | CCAAAUAGGACACACGAUG  |
| TRIM32   | 22954  | 15208649 | GGACAGUUAACGUGGAAGA  |
| TRIM32   | 22954  | 15208649 | GUGAAGUACUAGUCGCUGA  |
| RNF121   | 55298  | 37588864 | GAAAUGGUCCUCAUCCUCA  |
| RNF121   | 55298  | 37588864 | GCAAACGUGUCCCUACUGC  |
| RNF121   | 55298  | 37588864 | CGUAUAGGCUGUCCUGCAA  |
| RNF121   | 55298  | 37588864 | CCAUAAGGGUUCUACAGCGA |
| RNF26    | 79102  | 34878803 | UGUGUACUCUGCUGUAUAG  |
| RNF26    | 79102  | 34878803 | GCCGAGAGAGGCUCAAUUA  |
| RNF26    | 79102  | 34878803 | GCACUGAAAUCCUGAUGCG  |
| RNF26    | 79102  | 34878803 | CGUAGUGGCUGCCUCCUA   |
| KRTAP5-9 | 3846   | 40254818 | CCAACAAGUGACUACCCUU  |
| KRTAP5-9 | 3846   | 40254818 | GCUCUAGUGGGAAACCUCA  |
| KRTAP5-9 | 3846   | 40254818 | CCCAUAUGUCUGAGCCAAA  |
| KRTAP5-9 | 3846   | 40254818 | CCUAUAAGAAUAUCCCAAG  |
| RNF13    | 11342  | 34577092 | UUACUGAGACCUUUAGCUU  |
| RNF13    | 11342  | 34577092 | GAAUCCCGCUCACAUCAGA  |
| RNF13    | 11342  | 34577092 | UGAACGGGAUUACAACUA   |
| RNF13    | 11342  | 34577092 | GACAGAAUCUUCAGACUAU  |
| IBRDC3   | 127544 | 23503262 | GCCCGAAGCUAACUUGUGA  |
| IBRDC3   | 127544 | 23503262 | CAGCGAAACGGCCAGCUUU  |
| IBRDC3   | 127544 | 23503262 | CAGAUGGACUUAUGUGUUAU |
| IBRDC3   | 127544 | 23503262 | CCAAAUCAGACAUGC GAUA |
| VPS8     | 23355  | 57863274 | GCACUUUGGUUCCGUUAU   |
| VPS8     | 23355  | 57863274 | GCAAAUAUCUCCUUGUAUC  |
| VPS8     | 23355  | 57863274 | CAACCCAACCCAAGUUAUA  |
| VPS8     | 23355  | 57863274 | GCAAUAAGCUCCUUGUAUA  |
| TRIM49   | 57093  | 35493773 | CAAGAUGUACCCUAUUUCA  |
| TRIM49   | 57093  | 35493773 | CAUAUUACUCUGCAUCAUG  |
| TRIM49   | 57093  | 35493773 | GUUAAUCAAAAGCUCCCAA  |
| TRIM49   | 57093  | 35493773 | GAAGAUAGAUGGAAAGGCG  |
| SYTL4    | 94121  | 18152766 | GAACAAGGCCAGUAAACGU  |
| SYTL4    | 94121  | 18152766 | UGUUGGAGGUGACCGGAAA  |
| SYTL4    | 94121  | 18152766 | GCGACUAAAGAAUGAGUUA  |
| SYTL4    | 94121  | 18152766 | GAGAUGAAGAGGUCCGGAA  |
| RNF4     | 6047   | 34305289 | GAAUGGACGUCUCAUCGUU  |
| RNF4     | 6047   | 34305289 | GCAAUAAAUUCUAGACAAG  |
| RNF4     | 6047   | 34305289 | GACAGAGACGUAUAUGUGA  |
| RNF4     | 6047   | 34305289 | GCUAAUACUUGCCCAACUU  |
| LMO7     | 4008   | 33598967 | GAUGAUUACUCCACAAAUA  |
| LMO7     | 4008   | 33598967 | AGAGAGAGAAUCCAAGUA   |
| LMO7     | 4008   | 33598967 | UAGCAGGAUUGGAUAAUUA  |

|           |        |           |                      |
|-----------|--------|-----------|----------------------|
| LMO7      | 4008   | 33598967  | GAAAGCUUGUGAACAGAUU  |
| CHFR      | 55743  | 8922674   | CAACGUGGCAUACCUCUAU  |
| CHFR      | 55743  | 8922674   | CAACAACAGCUACGAGUCA  |
| CHFR      | 55743  | 8922674   | GCACUCAGGUGAAAGCUC   |
| CHFR      | 55743  | 8922674   | GAACAGUGAUUAACAAGCU  |
| MNAT1     | 4331   | 49574512  | UAGAUGAGCUGGAGAGUUC  |
| MNAT1     | 4331   | 49574512  | CAGCCCAGUUAACCAUUUA  |
| MNAT1     | 4331   | 49574512  | GGCUAUACUUCUUCUCUUG  |
| MNAT1     | 4331   | 49574512  | GUUUUUAAACCAUGUCAGA  |
| LOC646754 | 646754 | 169202589 | GGAUAAUGCUCUGAGUACA  |
| LOC646754 | 646754 | 169202589 | UCAUUAAGGAAGGUGAUAA  |
| LOC646754 | 646754 | 169202589 | GUGGGAAAUUAUUCGGCAA  |
| LOC646754 | 646754 | 169202589 | GCAGAUACCAUAUAGUUA   |
| PCGF2     | 7703   | 37595566  | GUGACGUGCAGGUCCAUA   |
| PCGF2     | 7703   | 37595566  | ACGAGCCACUGAAGGAAUA  |
| PCGF2     | 7703   | 37595566  | GGAUUUCUAUGCAGCGUAC  |
| PCGF2     | 7703   | 37595566  | CAAAUUGGUCCCUGGGCUU  |
| C1orf166  | 79594  | 13375704  | GUACAACAGCUAAUAGUUU  |
| C1orf166  | 79594  | 13375704  | UAACAGCCAGUUUGUGGAA  |
| C1orf166  | 79594  | 13375704  | GGCAUGCAGUACUAUCUAA  |
| C1orf166  | 79594  | 13375704  | GGAGCUGUGCGGUCUGUUA  |
| TRIM59    | 286827 | 27436876  | ACUAAGGGCUAUUAUUGAA  |
| TRIM59    | 286827 | 27436876  | GCCAUGCUCUCAUCAUUU   |
| TRIM59    | 286827 | 27436876  | UAACGGCUCUCUGUGAUGU  |
| TRIM59    | 286827 | 27436876  | GCACUGACAAUAUCUUUAC  |
| SLAH2     | 6478   | 55925659  | AGACAUAUGUGAAUACCGU  |
| SLAH2     | 6478   | 55925659  | GCAAGCAAGCCGAGAACUU  |
| SLAH2     | 6478   | 55925659  | GCUAAUAAACCCUGCAGCA  |
| SLAH2     | 6478   | 55925659  | GACAUCGUCUUUCUAGCUA  |
| RNF43     | 54894  | 56711321  | GCAGAACAGAAAGCUAUUA  |
| RNF43     | 54894  | 56711321  | UAUGAUGUGUGGAUCCUAA  |
| RNF43     | 54894  | 56711321  | GGAGAAAGCUAUUGCACAG  |
| RNF43     | 54894  | 56711321  | GGUGGAGUCUGAAAGAUC   |
| IBRDC1    | 154214 | 34303935  | CAUAGCGGUUGUAAUCGUU  |
| IBRDC1    | 154214 | 34303935  | GUUGUUAAGUGAUUAGCUA  |
| IBRDC1    | 154214 | 34303935  | CAUAUGACCUGCUCACAAU  |
| IBRDC1    | 154214 | 34303935  | GAACUUGGCCGUUUUGAUU  |
| RNF186    | 54546  | 9506662   | GCACCAAGACCCUGCAACA  |
| RNF186    | 54546  | 9506662   | GACAACACCCUGGUCCAUCA |
| RNF186    | 54546  | 9506662   | CAUCUACCCGGGUGUCUUA  |
| RNF186    | 54546  | 9506662   | AGCCACAUCUCUCCAUUG   |
| MARCH7    | 64844  | 53828927  | GGUGACUUAUGUAGAAUUU  |
| MARCH7    | 64844  | 53828927  | CAUAACAGGACAUUUGAU   |
| MARCH7    | 64844  | 53828927  | GGAGUAAUUUGACCGACAA  |
| MARCH7    | 64844  | 53828927  | GAACAUCAGACCAUACUAA  |
| ZA20D1    | 56957  | 9910155   | CCGAUUGGCCAGUGUAAUU  |
| ZA20D1    | 56957  | 9910155   | CCGAGUGGCUGAUUCCUUA  |
| ZA20D1    | 56957  | 9910155   | GCAUCUAGGUACCAAUGGA  |
| ZA20D1    | 56957  | 9910155   | UAACGGAGGGAGCAAGUAU  |
| TRIM54    | 57159  | 34878869  | GACAAUAGCCGGAGGCAGA  |
| TRIM54    | 57159  | 34878869  | GAACUUCACAGUGGGUUUC  |
| TRIM54    | 57159  | 34878869  | GGUCUUCGGUGCCCACAAG  |
| TRIM54    | 57159  | 34878869  | UCUACGGCCUGCAGCGAAA  |
| SYVN1     | 84447  | 51317310  | UCAUCAAGGUUCUGCUGUA  |
| SYVN1     | 84447  | 51317310  | GAGAAGAGAUGGUGACUGG  |
| SYVN1     | 84447  | 51317310  | CAACAUGAACACCCUGUAU  |
| SYVN1     | 84447  | 51317310  | GGAAAGGCCUCCAGCUCCU  |
| RKHD3     | 84206  | 47894110  | GAACGUGGAUCGCGCUCGA  |
| RKHD3     | 84206  | 47894110  | GCGAAGACCAUACUUACA   |
| RKHD3     | 84206  | 47894110  | GCGCAAUCGCAUCUGUGA   |
| RKHD3     | 84206  | 47894110  | GCGCACAACGGAAACAAUA  |
| RNF14     | 9604   | 34577097  | UUAAUGGACUUACGAAAUG  |
| RNF14     | 9604   | 34577097  | GAAUCACUGUCAAUUCUGA  |

|        |        |          |                     |
|--------|--------|----------|---------------------|
| RNF14  | 9604   | 34577097 | CUAGCAUACUUGAAUAUUG |
| RNF14  | 9604   | 34577097 | UUAGACGGAUGUAACAAGA |
| LPXN   | 9404   | 4758669  | CAACGACUACCACCAACUU |
| LPXN   | 9404   | 4758669  | UCCAGGAGCUCAAUGUCUA |
| LPXN   | 9404   | 4758669  | GCGCAGCUCGUGUAUACUA |
| LPXN   | 9404   | 4758669  | CUUCGGAGAUCCUUUCUAU |
| RNF11  | 26994  | 34452682 | GAUGACUGGUUGAUGAGAU |
| RNF11  | 26994  | 34452682 | UAGGAUAGCUCAAAGAAUA |
| RNF11  | 26994  | 34452682 | GGGAGUGUGUGAUCUGUAU |
| RNF11  | 26994  | 34452682 | GCACUGCUUUCAUCCUAUG |
| RFP2   | 10206  | 47132520 | GAAGGGAGUGUGCGGAAUU |
| RFP2   | 10206  | 47132520 | GACACUGGCACAUUCAUUA |
| RFP2   | 10206  | 47132520 | UAAAACAGCCGAUUUCAUA |
| RFP2   | 10206  | 47132520 | GAGACCAGCUCCAUUCAAG |
| TRIM58 | 25893  | 40353772 | CUAUGAAGCCGGUGAAAUA |
| TRIM58 | 25893  | 40353772 | GAAAGUCCUCGCUGCAUUG |
| TRIM58 | 25893  | 40353772 | UCACAAGGCUGGAAGCAGA |
| TRIM58 | 25893  | 40353772 | GAUUGGAGUUUGAGAAGCA |
| BFAR   | 51283  | 7706090  | GGACAUCACGGUUUCUCAU |
| BFAR   | 51283  | 7706090  | GCUACGACAUCCUGGUUAA |
| BFAR   | 51283  | 7706090  | UAACACAGGCCGAGCGAAU |
| BFAR   | 51283  | 7706090  | AGAAAUAUGGGAAUGAUCA |
| RNF19  | 25897  | 35493781 | ACAAAUACCUCUUCUGACA |
| RNF19  | 25897  | 35493781 | GCAAGUAGUAUUGAGUCA  |
| RNF19  | 25897  | 35493781 | GGUGUAACGUUGUCUGUAA |
| RNF19  | 25897  | 35493781 | ACGAUGUGCUGCUUAUAUA |
| BRPF1  | 7862   | 51173721 | GAACUGGGCCCUAAAGAA  |
| BRPF1  | 7862   | 51173721 | GAUCAAGGUUCAGCAGAUU |
| BRPF1  | 7862   | 51173721 | GACUACAUCUGGCUGGAUA |
| BRPF1  | 7862   | 51173721 | CGAAAGGUCUACAAGAGUU |
| RNF126 | 55658  | 37622891 | CAUCACACAGCUCCUCAAU |
| RNF126 | 55658  | 37622891 | GAACAAAACUGCUCCAACA |
| RNF126 | 55658  | 37622891 | CGGAUUUAUUCUGUCCAAG |
| RNF126 | 55658  | 37622891 | UGUCUAACCUCACCCUCUA |
| TRIM38 | 10475  | 24497622 | GGCCCUAAUUCAGGUUUA  |
| TRIM38 | 10475  | 24497622 | CAGCAAUGCGAAUAACUAA |
| TRIM38 | 10475  | 24497622 | GUGUAUAACAGACUUCUUU |
| TRIM38 | 10475  | 24497622 | CGGAUGGGAUUUAGGAGUU |
| RNF169 | 254225 | 51468839 | GAUGAACCAUUAGUACUGA |
| RNF169 | 254225 | 51468839 | GAACAGGACAGUGAUAAUA |
| RNF169 | 254225 | 51468839 | UUACUAGGCUCUGAAGGUA |
| RNF169 | 254225 | 51468839 | CCGAAGAACUAAACCAUUU |
| CBLL1  | 79872  | 13376203 | GACAAGAUUAAGACCGUAU |
| CBLL1  | 79872  | 13376203 | GGGGUGAGCUGUUUGCAA  |
| CBLL1  | 79872  | 13376203 | UAUCAACCAUCGCCAUUUG |
| CBLL1  | 79872  | 13376203 | GGGAAUGAGUCCUGGUUA  |
| LNX1   | 84708  | 14249127 | GGAAGAAUACUCUAACUA  |
| LNX1   | 84708  | 14249127 | GCACGGCCCUUUGAGAGAU |
| LNX1   | 84708  | 14249127 | CGAUAGUACUCAAAGCUUU |
| LNX1   | 84708  | 14249127 | GGAGAAUGACCGUGUGUUA |
| ARIH1  | 25820  | 9966762  | CGAGAUUUUCCCAAGAUU  |
| ARIH1  | 25820  | 9966762  | GAGAGUCGACGAAGGGUUU |
| ARIH1  | 25820  | 9966762  | CCAAAUGCCAUGUCACAAU |
| ARIH1  | 25820  | 9966762  | GGAUUUGCCUUGUCAGAUU |
| RNF175 | 285533 | 27734858 | GGGAUGUUCUCCGUUAUUA |
| RNF175 | 285533 | 27734858 | CACGAUUGGUCUACAAAUG |
| RNF175 | 285533 | 27734858 | GACAAUAUCUGUGCAGUCU |
| RNF175 | 285533 | 27734858 | CAUUUGGUGUUGUGGGUUA |
| NEURL  | 9148   | 21314780 | CCGCAGAACUCACUCAACU |
| NEURL  | 9148   | 21314780 | CCACAAGGCUGUCAAGAGG |
| NEURL  | 9148   | 21314780 | CUGACUCGCUGCCCAAGUA |
| NEURL  | 9148   | 21314780 | GGUAACAACUUCUCCAGUA |



|              |        |          |                       |
|--------------|--------|----------|-----------------------|
| LNX2         | 222484 | 34222215 | GGACAUACAUCUGCUACA    |
| LNX2         | 222484 | 34222215 | CAACGAAACACCUUUGAUU   |
| LNX2         | 222484 | 34222215 | CUUCAUAGCUGCCACGAUA   |
| LNX2         | 222484 | 34222215 | CCAAGUGGCUCUUCAUAAA   |
| RNF17        | 56163  | 14277695 | GAACUUUCUUGUUACGAUA   |
| RNF17        | 56163  | 14277695 | UGAUGUACAUUUAGAAGCA   |
| RNF17        | 56163  | 14277695 | GCCUGAUGUGAUAAUUGA    |
| RNF17        | 56163  | 14277695 | GCAAGAGCAUUACAAUUUAU  |
| RNF24        | 11237  | 10518498 | GGGCAGAGAACAUUGUAUA   |
| RNF24        | 11237  | 10518498 | GAAUUUACAUGAGCUCUGU   |
| RNF24        | 11237  | 10518498 | ACAGAAAGUGCCUUUUAAA   |
| RNF24        | 11237  | 10518498 | GCUCGGAUUUCCCAUAUA    |
| RNF146       | 81847  | 33636757 | GGACGUCGCAGGAAGAUUA   |
| RNF146       | 81847  | 33636757 | GAUGGACAGUGCACAGUAA   |
| RNF146       | 81847  | 33636757 | CCGUAAACCUAGCAAGAGA   |
| RNF146       | 81847  | 33636757 | GGAUGUAUCUGCAGUUGUU   |
| PHF2         | 5253   | 24797090 | AGGAGUUUGUGGACUAUUA   |
| PHF2         | 5253   | 24797090 | GCUCAAGAUCGACGAGUUU   |
| PHF2         | 5253   | 24797090 | ACGGGAAACUACUCCUUUA   |
| PHF2         | 5253   | 24797090 | CUUCACAGCUAAUCAAAAGA  |
| PEX10        | 5192   | 24797087 | UCUCAGAUGUGGCCUACUU   |
| PEX10        | 5192   | 24797087 | GAGAGAGCCGUUUCAGAA    |
| PEX10        | 5192   | 24797087 | CGCAGAAGGACGAGUACUA   |
| PEX10        | 5192   | 24797087 | UCACCACACUUGCAGGCUA   |
| MYLIP        | 29116  | 38788242 | GGUGAAAGUUUAUGGCUAA   |
| MYLIP        | 29116  | 38788242 | CCAGAACACUGCCAAGUAU   |
| MYLIP        | 29116  | 38788242 | GACUUUAGCCCAAUUAAUA   |
| MYLIP        | 29116  | 38788242 | UAACAGAGACGCACGCAUU   |
| ZNRF1        | 84937  | 30089958 | ACGAUGAUGUGCUGACUAA   |
| ZNRF1        | 84937  | 30089958 | GAACAGAUCUUGUCCGGAA   |
| ZNRF1        | 84937  | 30089958 | GGAAAUGCACUUUAUAAUG   |
| ZNRF1        | 84937  | 30089958 | GCAUAGUGGUUUAAGUGC    |
| TRIM11       | 81559  | 24497621 | CCGAAGACCUCUAAAGGCGAA |
| TRIM11       | 81559  | 24497621 | CCGAUGGGUCACUGCUAUU   |
| TRIM11       | 81559  | 24497621 | UGGGUGAGUUCGAGCGUCU   |
| TRIM11       | 81559  | 24497621 | AGGCGAAGCUGGAGAAGUC   |
| TRIM5        | 85363  | 15011943 | GCAGAAAGUUGAUCAUUGU   |
| TRIM5        | 85363  | 15011943 | GGAAUCCUGGUUAAUGUAA   |
| TRIM5        | 85363  | 15011943 | GAGAACAUCGCGCCUAAUC   |
| TRIM5        | 85363  | 15011943 | GGGUGUGGAUGGCGUCAUA   |
| TRAF7        | 84231  | 45594313 | GCAAGAGUGCCCUCUACAA   |
| TRAF7        | 84231  | 45594313 | GGGCACACGUUCUGUAGGA   |
| TRAF7        | 84231  | 45594313 | CGGUGAAGCUGUGCUGUCA   |
| TRAF7        | 84231  | 45594313 | GACCUUCGGACCCGCCUUU   |
| PHF8         | 23133  | 32698699 | GGUGAUGGAAGACGAAUUU   |
| PHF8         | 23133  | 32698699 | CUCAUGAGUGUGCGAGUAU   |
| PHF8         | 23133  | 32698699 | UGGGAGUGUUAGUAAUCAA   |
| PHF8         | 23133  | 32698699 | UCAAGAAGGCAGAGCGAAA   |
| RNF170       | 81790  | 21361953 | GGCCAAAUAUCAAGGUGAA   |
| RNF170       | 81790  | 21361953 | GAUCUACCCACUUUACUGA   |
| RNF170       | 81790  | 21361953 | GGGCAACCCAGAUCUAUUA   |
| RNF170       | 81790  | 21361953 | UAGACAAACGGUAACCUUA   |
| RNF182       | 221687 | 22749454 | GAGCCUCGUUAUUCUUAUG   |
| RNF182       | 221687 | 22749454 | UACAAUCGAUACAAUCUGA   |
| RNF182       | 221687 | 22749454 | GUUAGUAGCCUGCCCGAUG   |
| RNF182       | 221687 | 22749454 | UAUGGCACCUCCUUCUUAU   |
| UHRF1        | 29128  | 16507203 | GCCAUACCCUCUUCGACUA   |
| UHRF1        | 29128  | 16507203 | GUAAAGUGGAGGAGACGUU   |
| UHRF1        | 29128  | 16507203 | GCGGAACAGUCUUGUGAUC   |
| UHRF1        | 29128  | 16507203 | GCAAGGGCAUGGCCUGUGU   |
| DKFZP547C195 | 257160 | 46409321 | GAAUGUUCGUGACCAAUUU   |
| DKFZP547C195 | 257160 | 46409321 | GAACAUUGCUGUACAGACU   |
| DKFZP547C195 | 257160 | 46409321 | UGUAAGCUAUGUCUAAUGU   |

|              |        |          |                      |
|--------------|--------|----------|----------------------|
| DKFZP547C195 | 257160 | 46409321 | GGAAAGAGUUACUGGUACU  |
| PJA2         | 9867   | 41281511 | GCAGGAGGGUAUCAGACAA  |
| PJA2         | 9867   | 41281511 | GAAGCACCCUAAACCUUGA  |
| PJA2         | 9867   | 41281511 | GUUAGAUUCUGUACCAUUA  |
| PJA2         | 9867   | 41281511 | AGACUGCUCUGGCCCAUUU  |
| PML          | 5371   | 67089153 | GGACAUGCACGGUUUCCUG  |
| PML          | 5371   | 67089153 | GGAAAGAUGCAGCUGUAUC  |
| PML          | 5371   | 67089153 | GCAACCAGUCGGUGCGUGA  |
| PML          | 5371   | 67089153 | GAGCUCAAGUGCGACAUCA  |
| UBOX5        | 22888  | 40806195 | GGAGAAGUGUAACCGCAGU  |
| UBOX5        | 22888  | 40806195 | GGCGGUAUCCCUUGUAUCA  |
| UBOX5        | 22888  | 40806195 | GCAACAAGAUUAUCAGCUGA |
| UBOX5        | 22888  | 40806195 | GACAGUAACUUUGGUGUAA  |
| TRIM65       | 201292 | 38679904 | AGCCAAGCCUGUGGACUUA  |
| TRIM65       | 201292 | 38679904 | GCGCCAACCGUCACUUCUA  |
| TRIM65       | 201292 | 38679904 | GCAGCCAGAUCAGAACUC   |
| TRIM65       | 201292 | 38679904 | GUAGGACCCUGACCCUGUG  |
| DPF2         | 5977   | 21536317 | GAAGAUACUCCCAAGCGUC  |
| DPF2         | 5977   | 21536317 | GACCAACAGUCGAGCGCGA  |
| DPF2         | 5977   | 21536317 | GGAGUAGCCCAGAGCAAUU  |
| DPF2         | 5977   | 21536317 | CCGGACAGCUGUACUCCUA  |
| JARID1C      | 8242   | 11321604 | GACAAGACUCUGCGGAAGA  |
| JARID1C      | 8242   | 11321604 | CUACGAACGCAUUGUUUAU  |
| JARID1C      | 8242   | 11321604 | GACGAGGCUACCCGGGAAU  |
| JARID1C      | 8242   | 11321604 | UCGCAGAGAAAUCGGGCAU  |
| BAZ1B        | 9031   | 14670391 | CCAUAUAGCUGCACACUAA  |
| BAZ1B        | 9031   | 14670391 | AUAAGGAGAUAGUUCGAUA  |
| BAZ1B        | 9031   | 14670391 | GCAUUCAGAUUGGUGGAUA  |
| BAZ1B        | 9031   | 14670391 | GCACGUAGAUCGCCACGAA  |
| AOF1         | 221656 | 60685218 | GUAAUUGAGUAGCAGUAAA  |
| AOF1         | 221656 | 60685218 | CCUAAGGACUACCACAAUA  |
| AOF1         | 221656 | 60685218 | CCGGUAGGCAGGCGAAGAA  |
| AOF1         | 221656 | 60685218 | AAGGCAGGCUGUACGGCAA  |
| RNF113A      | 7737   | 5902157  | GCGAAAGAAUUGAUUGCUA  |
| RNF113A      | 7737   | 5902157  | UUACUUAGGUUCCCAUAA   |
| RNF113A      | 7737   | 5902157  | GACAAGAUCUAUCGGGGAA  |
| RNF113A      | 7737   | 5902157  | GGGUGGUGCUUCCGACUUG  |
| PCGF5        | 84333  | 83816965 | GAGGUUGGACAAUACAUUA  |
| PCGF5        | 84333  | 83816965 | CAACAACAGUGACGGAAUG  |
| PCGF5        | 84333  | 83816965 | GAAGAAAUUCAUUCGAUGU  |
| PCGF5        | 84333  | 83816965 | ACAAAUUGCUAUCUGUCUA  |
| MDM4         | 4194   | 4505138  | CCACGAGACGGGAACAUUA  |
| MDM4         | 4194   | 4505138  | CGUCAGAGCUUCUCCGUAA  |
| MDM4         | 4194   | 4505138  | CCUAAAGAUGCUGUAUUA   |
| MDM4         | 4194   | 4505138  | AAGCAUGGGAGAACAGUUA  |
| SSA1         | 6737   | 56549143 | UCUCAGAGCUAGAUCGAAG  |
| SSA1         | 6737   | 56549143 | GAAUGUGCCUUACAGGAC   |
| SSA1         | 6737   | 56549143 | GCAGCACGCUUGACAAUGA  |
| SSA1         | 6737   | 56549143 | AAUAUUGGAUCACAAGGAU  |
| KIAA1333     | 55632  | 33620748 | GAGCCUAUCCAAGUUAUA   |
| KIAA1333     | 55632  | 33620748 | CCAUCGACCGUUCAAAUA   |
| KIAA1333     | 55632  | 33620748 | UAAACCCACUCCUCAAUU   |
| KIAA1333     | 55632  | 33620748 | UCGAAGAUGUCGUUGCAAA  |
| LOC399940    | 399940 | 51470744 | GCAAGAAGACAAUACAGCA  |
| LOC399940    | 399940 | 51470744 | GAACACAGAAACCACCAGA  |
| LOC399940    | 399940 | 51470744 | CAUCAAAUGGGACAAAUA   |
| LOC399940    | 399940 | 51470744 | GAAAGAACCAAUAGUCAUA  |
| TRIM50A      | 135892 | 31342404 | GUACGAAGCCUUUGCCUGC  |
| TRIM50A      | 135892 | 31342404 | GGCUCUACCUGCACUAUGA  |
| TRIM50A      | 135892 | 31342404 | CGUAAGGGCAAGCUGAACA  |
| TRIM50A      | 135892 | 31342404 | GAACUCACCUUCUUCGAUG  |
| MEFV         | 4210   | 4557742  | GCAUAUGACACCCGCGUAU  |
| MEFV         | 4210   | 4557742  | GCAGGCCCUUCGAAGUGUA  |

|          |        |           |                      |
|----------|--------|-----------|----------------------|
| MEFV     | 4210   | 4557742   | GCCCGCAAAUCCAGAAAUU  |
| MEFV     | 4210   | 4557742   | GCUACUGGGUGGUGAUAAU  |
| RBBP6    | 5930   | 38683864  | AGACAUUAGUUUAUAAGUCG |
| RBBP6    | 5930   | 38683864  | UAUUGGAGGUGUUAAAUCU  |
| RBBP6    | 5930   | 38683864  | CGAAAGAAGAAUAUACUGA  |
| RBBP6    | 5930   | 38683864  | CCUCUAAACUCAACUAUGA  |
| UNK      | 85451  | 89041820  | CCACCAAGUGCAACGACAU  |
| UNK      | 85451  | 89041820  | CCUGAAAAGAAUCCGCACA  |
| UNK      | 85451  | 89041820  | GGAGAAGACUUUCGAUAAC  |
| UNK      | 85451  | 89041820  | AAGCACAAAUACAGGUCGU  |
| RNF111   | 54778  | 37595552  | GAGUUGAGAUGAUUAAUAG  |
| RNF111   | 54778  | 37595552  | GCAAAUAGUAGUUCUGGUA  |
| RNF111   | 54778  | 37595552  | UGAGACGUCUCCAUGUAU   |
| RNF111   | 54778  | 37595552  | GCGCUUCCAUAACAAUUC   |
| TRIM68   | 55128  | 37622898  | GAGAGAUCUGAAGACUUA   |
| TRIM68   | 55128  | 37622898  | GAGGAUGUCUUGAUAAUGU  |
| TRIM68   | 55128  | 37622898  | GAAGGGAAAUGAGUACCGA  |
| TRIM68   | 55128  | 37622898  | GAACUGGGGUACACCCUGU  |
| TRIM47   | 91107  | 54792145  | CCAAAGGUGUCAAGAGGGU  |
| TRIM47   | 91107  | 54792145  | GUACGGGACGGCAAGAUGA  |
| TRIM47   | 91107  | 54792145  | CCCAAGACCUCGAGAGUAC  |
| TRIM47   | 91107  | 54792145  | CAUCAAGAGUGCAGCCGUA  |
| BIRC4    | 331    | 32528298  | GAAAGAGAUUAGUACUGAA  |
| BIRC4    | 331    | 32528298  | GGACUCUACUACACAGGUA  |
| BIRC4    | 331    | 32528298  | GUAGAUAGAUGGCAAUUG   |
| BIRC4    | 331    | 32528298  | GAACUGGGCAGGUUGUAGA  |
| RNF208   | 727800 | 119220602 | GGACAUGCCUGCCUUGGAA  |
| RNF208   | 727800 | 119220602 | AUUGUGAAUCAGUACGUGA  |
| RNF208   | 727800 | 119220602 | CAGAGAUCAUUGUCAACCA  |
| RNF208   | 727800 | 119220602 | UGAAAAGUCCCUGAGCUA   |
| NHLRC1   | 378884 | 40255282  | GGCGAUCGCUCCAUCAAG   |
| NHLRC1   | 378884 | 40255282  | GUGUUUAGCUCAAGUAUGC  |
| NHLRC1   | 378884 | 40255282  | CAGAAUGGGAUUGUGGUAA  |
| NHLRC1   | 378884 | 40255282  | GAUCAAGCUUGUCAUUGGA  |
| BIRC8    | 112401 | 44680138  | GCAGCGCGGUUAUUGAUUU  |
| BIRC8    | 112401 | 44680138  | CUAUAGGUCAAGAGGAUAA  |
| BIRC8    | 112401 | 44680138  | GUGAUACCAUCUCCCCUAA  |
| BIRC8    | 112401 | 44680138  | GAUGUACUCCGUUAACAAA  |
| TRIM48   | 79097  | 34147361  | UGGGAGAAGCUGUAAAAGA  |
| TRIM48   | 79097  | 34147361  | GAGCUUCGUUGAUGUUAGU  |
| TRIM48   | 79097  | 34147361  | GAUAUUACUCUGCAUCACA  |
| TRIM48   | 79097  | 34147361  | GCAUAAAAGACAAUACAGCA |
| MARCH1   | 55016  | 53759068  | CAAGAUAUCAACCAUGUAU  |
| MARCH1   | 55016  | 53759068  | CAUGUAAUGUAAACACAGA  |
| MARCH1   | 55016  | 53759068  | GGUUUGGUCUUUGUAUGUA  |
| MARCH1   | 55016  | 53759068  | GCAGCCACGUUUGUUGUAA  |
| MLLT10   | 8028   | 57546898  | UAGCAAGACUUAGUGAUAA  |
| MLLT10   | 8028   | 57546898  | CAGCAAUGAUGUAGCAGUA  |
| MLLT10   | 8028   | 57546898  | GGCAAUAGAUCAAAUUCAU  |
| MLLT10   | 8028   | 57546898  | GUAACCAACUGGCAAUUAA  |
| ZNF364   | 27246  | 33859667  | CAAACUACCGGAAUUAUA   |
| ZNF364   | 27246  | 33859667  | GCAAGCAACAGAUUUAGCA  |
| ZNF364   | 27246  | 33859667  | ACAAGUUGAUUUGGGUUUA  |
| ZNF364   | 27246  | 33859667  | CCUGACAGAUCUCCAGCUA  |
| MKRN1    | 23608  | 21359891  | UCAAGUCUCUCAUCGAUAG  |
| MKRN1    | 23608  | 21359891  | GAGUGGGACUUGUUUCAUG  |
| MKRN1    | 23608  | 21359891  | GCAAGUGGAGGAGUGCUIA  |
| MKRN1    | 23608  | 21359891  | UGACUUGGAUCUAUAGCAA  |
| FLJ14627 | 84900  | 14249505  | GGACGUGUGGGCGGAGUUA  |
| FLJ14627 | 84900  | 14249505  | GUAGGUUACUAGUGAAUAC  |
| FLJ14627 | 84900  | 14249505  | GACGGAACCCAGUGUAUUA  |
| FLJ14627 | 84900  | 14249505  | UGAAGGGGCACAAGAAAUU  |
| RNF207   | 388591 | 124487386 | CCGAGGAGGAGGACGCUAU  |

|          |        |           |                      |
|----------|--------|-----------|----------------------|
| RNF207   | 388591 | 124487386 | CCAGGAAGUGUCCCGGAAA  |
| RNF207   | 388591 | 124487386 | GUGCAGAGCCAAUACGAAG  |
| RNF207   | 388591 | 124487386 | GGAGGGAACACCCGACUUA  |
| MARCH3   | 115123 | 31341961  | UCCAAAGUCUGUCAAUUGUA |
| MARCH3   | 115123 | 31341961  | GCGCAAACCCAGGCCGUUA  |
| MARCH3   | 115123 | 31341961  | GGAGGAUUGUGGCAGCCUA  |
| MARCH3   | 115123 | 31341961  | UGAAUUGGGCAGCCGAGUA  |
| TRIM74   | 378108 | 38524611  | GAAAUGAGGACCACCAUGA  |
| TRIM74   | 378108 | 38524611  | GGAAGAUAGAGGAAAGUCA  |
| TRIM74   | 378108 | 38524611  | CUACAGAAAUACUAGAGGA  |
| TRIM74   | 378108 | 38524611  | CAAGGAGUCCCUAAUGCUA  |
| RNF165   | 494470 | 57165360  | CCACACAGAUGGUCGUCCA  |
| RNF165   | 494470 | 57165360  | UGUUUGGCUCUGUGCGAAA  |
| RNF165   | 494470 | 57165360  | GGAUACAUCCAUACGAAA   |
| RNF165   | 494470 | 57165360  | UGACAAACAACUACGAAUA  |
| TRIM10   | 10107  | 16519562  | CCAGAGGAUUCGGGACUUU  |
| TRIM10   | 10107  | 16519562  | UGAGGGAGCCGGUCACUAU  |
| TRIM10   | 10107  | 16519562  | UCGCACACCUGAGGAAGUU  |
| TRIM10   | 10107  | 16519562  | CAUCAGAAGCACUCUAAUA  |
| EEA1     | 8411   | 55770887  | GCAGUCAGCUGGAAAGUCA  |
| EEA1     | 8411   | 55770887  | GAACCUUGAAGCUUUAUUA  |
| EEA1     | 8411   | 55770887  | GUUCAACACUAAUGGAUA   |
| EEA1     | 8411   | 55770887  | GAAGCAACGGUUCAGAAUA  |
| RFP      | 5987   | 18641280  | GAACCAGCUCGACCAUUUA  |
| RFP      | 5987   | 18641280  | GAGAUGGGCGUGUGCGAGA  |
| RFP      | 5987   | 18641280  | UAAGAGAGGCUCAGUUUA   |
| RFP      | 5987   | 18641280  | CGGAGAGUCUAAAGCAGUU  |
| C17ORF27 | 57674  | 66571326  | CAACAUCGCUCGUGGACAA  |
| C17ORF27 | 57674  | 66571326  | GUCCAUUGCUCUAAGAUUU  |
| C17ORF27 | 57674  | 66571326  | CAACACAACGGAAGCUAUA  |
| C17ORF27 | 57674  | 66571326  | ACACAGAAUUGUCAACUAA  |
| TRIM61   | 391712 | 60099473  | GGAGAGAGUGGAACUAAUU  |
| TRIM61   | 391712 | 60099473  | UCAGAAAGACCUAGAGCUU  |
| TRIM61   | 391712 | 60099473  | CUGGGUAGUUUGACUGAAA  |
| TRIM61   | 391712 | 60099473  | GGAUCUACAUGAUAGUUUC  |
| TRIM29   | 23650  | 17402906  | GGAAUUUGGUGCAUUGAUG  |
| TRIM29   | 23650  | 17402906  | AGCCGUAACUUCAUUGAGA  |
| TRIM29   | 23650  | 17402906  | GAAGCCACCCGUUACUUU   |
| TRIM29   | 23650  | 17402906  | GAAGAGAUACUCCAUGUAC  |

**Supplementary Table 2 The List of Primers**

| <b>Gene</b>   | <b>sense (5'-3')</b> | <b>antisense (5'-3')</b> |
|---------------|----------------------|--------------------------|
| <i>hCKS1</i>  | AATCTTGGCGTTCAGCA    | TTGGTTTCTTGGGTAGTGG      |
| <i>hCCNB1</i> | CTTTCGCCTGAGCCTATTT  | CCATCTTCTGCATCCACAT      |
| <i>hFN1</i>   | ATTCTGTAGGCCGTTGGA   | TACTGCTGGATGCTGATGA      |
| <i>hSKP2</i>  | TACAGGTGGCTGTTGCG    | TGGAGGTAGTTGAGCTGGA      |
| <i>hZEB1</i>  | GCCTGAGTCCTCTGTTTCA  | GCTCTTCTGCACTTGGTTG      |

**Supplementary Table 3 The Clinicopathologic Features of Microarrays**

| Patient | Survival state | Survival time | Sex    | Age | Tumor location                     | T   | N   | M  | TNM stage |
|---------|----------------|---------------|--------|-----|------------------------------------|-----|-----|----|-----------|
| 1       | 1              | 3             | male   | 73  | gastric cardia                     | T4a | N3b | M0 | IIIC      |
| 2       | 0              | 88            | male   | 56  | gastric angle                      | T3  | N3a | M0 | IIIB      |
| 3       | 1              | 17            | female | 79  | gastric body                       | T3  | N0  | M0 | IIA       |
| 4       | 0              | 88            | female | 69  | gastric angle                      | T3  | N1  | M0 | IIB       |
| 5       | 1              | 8             | male   | 68  | lesser curvature of gastric body   | T4a | N3a | M0 | IIIC      |
| 6       | 1              | 10            | male   | 71  | gastric antrum                     | T4a | N2  | M0 | IIIB      |
| 7       | 1              | 5             | female | 68  | lesser curvature                   | T4a | N1  | M0 | IIIA      |
| 8       | 1              | 11            | female | 68  | gastric angle                      | T3  | N1  | M0 | IIB       |
| 9       | 1              | 44            | male   | 71  | gastric antrum                     | T3  | N2  | M0 | IIIA      |
| 10      | 0              | 88            | male   | 50  | gastric antrum                     | T4a | N2  | M0 | IIIB      |
| 11      | 1              | 16            | female | 52  | lesser curvature                   | T3  | N3b | M0 | IIIB      |
| 12      | 1              | 8             | male   | 78  | lesser curvature of gastric body   | T3  | N3b | M0 | IIIB      |
| 13      | 0              | 88            | male   | 67  | gastric fundus                     | T3  | N0  | M0 | IIA       |
| 14      | 1              | 0             | male   | 75  | lesser curvature of gastric antrum | T4b | N3a | M0 | IIIC      |
| 15      | 1              | 7             | male   | 75  | gastric antrum                     | T4a | N3b | M0 | IIIC      |
| 16      | 0              | 87            | male   | 78  | gastric body                       | T3  | N0  | M0 | IIA       |
| 17      | 1              | 10            | male   | 51  | remnant stomach                    | T3  | N2  | M0 | IIIA      |
| 18      | 1              | 67            | male   | 74  | gastric antrum                     | T4a | N2  | M0 | IIIB      |
| 19      | 1              | 4             | female | 67  | gastric antrum                     | T3  | N3a | M0 | IIIB      |
| 20      | 1              | 12            | male   | 62  | remnant stomach                    | T3  | N0  | M0 | IIA       |
| 21      | 1              | 2             | male   | 66  | lesser curvature                   | T4a | N3a | M0 | IIIC      |
| 22      | 0              | 87            | male   | 67  | lesser curvature                   | T3  | N0  | M0 | IIA       |
| 23      | 1              | 26            | male   | 73  | gastric antrum                     | T3  | N2  | M0 | IIIA      |
| 24      | 1              | 14            | female | 76  | gastric antrum                     | T3  | N1  | M0 | IIB       |
| 25      | 1              | 54            | male   | 59  | gastric antrum                     | T4a | N2  | M0 | IIIB      |
| 26      | 1              | 14            | male   | 59  | gastric antrum                     | T3  | N2  | M0 | IIIA      |
| 27      | 0              | 86            | male   | 58  | gastric angle                      | T2  | N0  | M0 | IB        |
| 28      | 0              | 86            | female | 31  | greater curvature                  | T2  | N0  | M0 | IB        |
| 29      | 0              | 86            | male   | 64  | gastric body                       | T2  | N1  | M0 | IIA       |
| 30      | 1              | 22            | male   | 52  | stomach                            | T3  | N1  | M0 | IIB       |
| 31      | 1              | 19            | male   | 54  | gastric antrum                     | T3  | N3a | M0 | IIIB      |
| 32      | 1              | 15            | male   | 63  | stomach                            | T3  | N3b | M0 | IIIB      |
| 33      | 0              | 85            | male   | 67  | lesser curvature                   | T3  | N0  | M0 | IIA       |
| 34      | 1              | 28            | female | 65  | lesser curvature of gastric antrum | T3  | N3b | M0 | IIIB      |
| 35      | 1              | 15            | male   | 54  | gastric cardia                     | T3  | N2  | M0 | IIIA      |
| 36      | 1              | 22            | male   | 72  | lesser curvature of gastric body   | T3  | N1  | M0 | IIB       |
| 37      | 0              | 84            | female | 46  | gastric antrum                     | T1b | N0  | M0 | IA        |
| 38      | 1              | 17            | female | 60  | gastric body                       | T4a | N2  | M0 | IIIB      |
| 39      | 1              | 54            | female | 68  | stomach                            | T3  | N0  | M0 | IIA       |
| 40      | 1              | 50            | male   | 61  | gastric cardia                     | T3  | N2  | M0 | IIIA      |
| 41      | 1              | 38            | male   | 59  | gastric antrum                     | T3  | N3a | M0 | IIIB      |
| 42      | 0              | 84            | female | 78  | gastric cardia                     | T4a | N2  | M0 | IIIB      |
| 43      | 1              | 0             | male   | 76  | gastric antrum                     | T4a | N3b | M0 | IIIC      |
| 44      | 1              | 22            | male   | 77  | gastric fundus                     | T2  | N2  | M0 | IIB       |
| 45      | 1              | 13            | male   | 68  | gastric antrum                     | T3  | N2  | M0 | IIIA      |
| 46      | 1              | 27            | female | 52  | lesser curvature of gastric cardia | T4b | N3b | M0 | IIIC      |
| 47      | 0              | 83            | female | 52  | gastric fundus                     | T3  | N1  | M0 | IIB       |
| 48      | 1              | 7             | female | 82  | gastric antrum                     | T3  | N2  | M0 | IIIA      |
| 49      | 1              | 26            | male   | 59  | gastric cardia                     | T3  | N2  | M0 | IIIA      |
| 50      | 1              | 28            | female | 62  | lesser curvature of gastric body   | T3  | N3b | M0 | IIIB      |
| 51      | 1              | 37            | female | 83  | gastric cardia of fundus           | T3  | N0  | M0 | IIA       |
| 52      | 1              | 23            | female | 72  | gastric cardia                     | T3  | N3a | M0 | IIIB      |
| 53      | 1              | 9             | male   | 65  | gastric cardia                     | T4b | N2  | M0 | IIIB      |
| 54      | 1              | 39            | male   | 53  | gastric antrum                     | T3  | N1  | M0 | IIB       |
| 55      | 1              | 44            | male   | 75  | gastric body                       | T3  | N1  | M1 | IV        |
| 56      | 1              | 10            | male   | 50  | stomach                            | T4a | N3a | M0 | IIIC      |

|     |   |    |        |    |                                    |     |     |    |      |
|-----|---|----|--------|----|------------------------------------|-----|-----|----|------|
| 57  | 1 | 12 | female | 61 | stomach                            | T3  | N3a | M0 | IIIB |
| 58  | 1 | 9  | female | 77 | lesser curvature                   | T3  | N1  | M0 | IIB  |
| 59  | 1 | 6  | male   | 80 | gastric cardia                     | T3  | N2  | M0 | IIIA |
| 60  | 1 | 16 | male   | 81 | lesser curvature of gastric antrum | T4a | N2  | M0 | IIIB |
| 61  | 1 | 35 | male   | 67 | gastric cardia                     | T4a | N1  | M0 | IIIA |
| 62  | 1 | 5  | male   | 71 | gastric antrum                     | T3  | N3b | M0 | IIIB |
| 63  | 0 | 97 | male   | 70 | gastric fundus                     | T3  | N0  | M0 | IIA  |
| 64  | 1 | 14 | female | 53 | remnant stomach                    | T4a | N0  | M0 | IIB  |
| 65  | 1 | 35 | female | 52 | lesser curvature of gastric antrum | T3  | N3a | M0 | IIIB |
| 66  | 1 | 11 | male   | 69 | lesser curvature                   | T3  | N3a | M0 | IIIB |
| 67  | 1 | 28 | male   | 61 | gastric body                       | T3  | N0  | M0 | IIA  |
| 68  | 1 | 32 | male   | 55 | lesser curvature of gastric antrum | T3  | N2  | M0 | IIIA |
| 69  | 0 | 97 | female | 65 | gastric body,gastric antrum        | T2  | N1  | M0 | IIA  |
| 70  | 0 | 97 | female | 53 | lesser curvature of gastric body   | T3  | N0  | M0 | IIA  |
| 71  | 1 | 67 | male   | 62 | lesser curvature of gastric angle  | T2  | N3a | M0 | IIIA |
| 72  | 1 | 27 | male   | 58 | lesser curvature of gastric cardia | T3  | N2  | M0 | IIIA |
| 73  | 1 | 10 | male   | 49 | lesser curvature of gastric antrum | T3  | N3a | M0 | IIIB |
| 74  | 0 | 96 | male   | 71 | gastric cardia                     | T3  | N0  | M0 | IIA  |
| 75  | 1 | 8  | male   | 64 | lesser curvature of gastric body   | T3  | N3a | M0 | IIIB |
| 76  | 1 | 35 | male   | 79 | gastric antrum                     | T3  | N2  | M0 | IIIA |
| 77  | 1 | 18 | female | 67 | lesser curvature                   | T3  | N3a | M0 | IIIB |
| 78  | 1 | 2  | male   | 73 | pylorus                            | T3  | N0  | M0 | IIA  |
| 79  | 1 | 24 | male   | 57 | lesser curvature                   | T3  | N2  | M0 | IIIA |
| 80  | 1 | 46 | male   | 54 | gastric body                       | T3  | N1  | M0 | IIB  |
| 81  | 1 | 42 | male   | 63 | lesser curvature                   | T3  | N2  | M0 | IIIA |
| 82  | 1 | 6  | female | 52 | gastric body                       | T3  | N3a | M0 | IIIB |
| 83  | 1 | 58 | male   | 81 | gastric antrum                     | T3  | N2  | M0 | IIIA |
| 84  | 1 | 23 | female | 77 | lesser curvature of gastric antrum | T2  | N1  | M0 | IIA  |
| 85  | 1 | 25 | female | 72 | lesser curvature                   | T4a | N2  | M0 | IIIB |
| 86  | 1 | 5  | female | 62 | lesser curvature of gastric antrum | T4a | N3a | M0 | IIIC |
| 87  | 1 | 15 | male   | 68 | gastric antrum                     | T3  | N3a | M1 | IV   |
| 88  | 1 | 15 | female | 79 | gastric antrum                     | T3  | N1  | M0 | IIB  |
| 89  | 0 | 94 | male   | 72 | gastric antrum                     | T1a | N0  | M0 | IA   |
| 90  | 1 | 3  | male   | 81 | lesser curvature of gastric antrum | T2  | N3a | M0 | IIIA |
| 91  | 1 | 22 | female | 72 | gastric antrum                     | T3  | N3a | M0 | IIIB |
| 92  | 1 | 22 | male   | 55 | gastric body                       | T3  | N3a | M0 | IIIB |
| 93  | 1 | 18 | male   | 80 | gastric cardia                     | T3  | N3a | M0 | IIIB |
| 94  | 1 | 24 | male   | 57 | stomach                            | T4a | N3b | M1 | IV   |
| 95  | 1 | 27 | female | 65 | gastric antrum                     | T3  | N1  | M0 | IIB  |
| 96  | 1 | 31 | male   | 59 | gastric antrum                     | T3  | N3a | M0 | IIIB |
| 97  | 1 | 11 | male   | 83 | gastric antrum                     | T3  | N2  | M0 | IIIA |
| 98  | 1 | 39 | male   | 75 | gastric antrum                     | T4a | N2  | M0 | IIIB |
| 99  | 1 | 9  | male   | 59 | gastroenteric stoma                | T4a | N3a | M0 | IIIC |
| 100 | 1 | 42 | female | 73 | lesser curvature                   | T3  | N3a | M0 | IIIB |
| 101 | 1 | 19 | male   | 59 | gastric antrum                     | T3  | N3a | M0 | IIIB |
| 102 | 1 | 2  | male   | 78 | gastric antrum                     | T3  | N3a | M0 | IIIB |
| 103 | 1 | 63 | male   | 82 | gastric fundus                     | T3  | N2  | M0 | IIIA |
| 104 | 1 | 24 | male   | 62 | gastric cardia of fundus           | T3  | N3a | M0 | IIIB |
| 105 | 1 | 21 | male   | 73 | gastric cardia                     | T3  | N1  | M0 | IIB  |
| 106 | 1 | 44 | male   | 58 | gastric cardia of fundus           | T3  | N3a | M0 | IIIB |
| 107 | 1 | 43 | male   | 67 | gastric cardia of fundus           | T4a | N1  | M0 | IIIA |
| 108 | 1 | 27 | male   | 67 | lesser curvature of gastric antrum | T3  | N2  | M0 | IIIA |
| 109 | 1 | 30 | male   | 71 | gastric antrum                     | T3  | N1  | M0 | IIB  |
| 110 | 1 | 13 | male   | 80 | gastric cardia                     | T4a | N2  | M0 | IIIB |

# Unedited blot and gel

Full unedited gels for Figure. 1

## Figure.1B

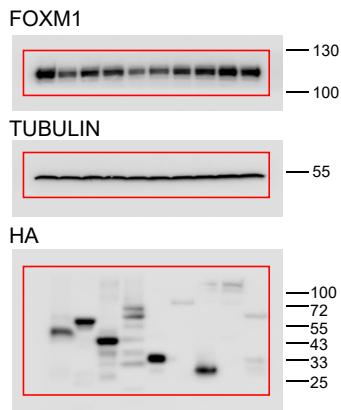

## Figure.1C

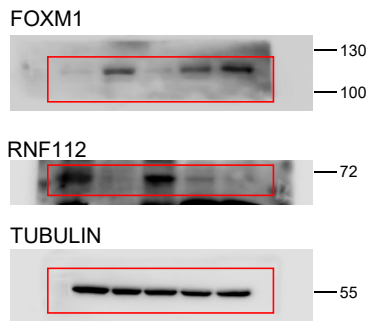

## Figure.1D

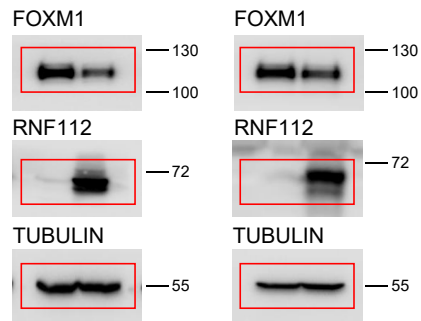

## Figure.1E

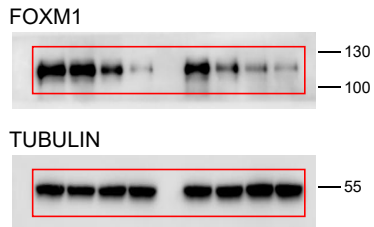

## Figure.1F

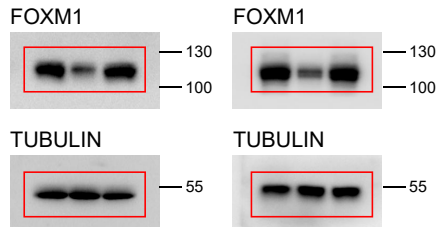

## Figure.1G

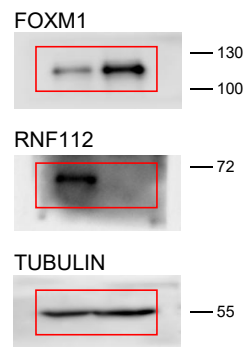

## Figure.1H

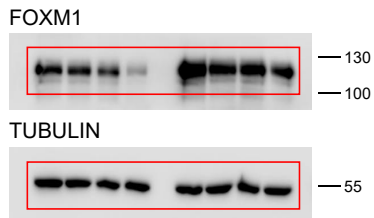



# Unedited blot and gel

Full unedited gels for Figure. 2

Figure.2D

RNF112

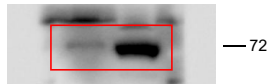

CKS1

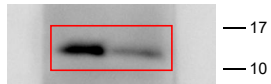

CCNB1

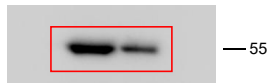

SKP2

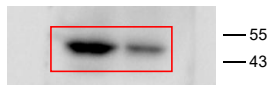

FN1

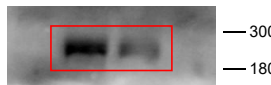

ZEB1

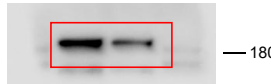

TUBULIN

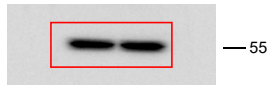

RNF112

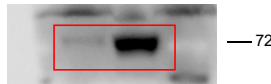

CKS1

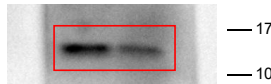

CCNB1

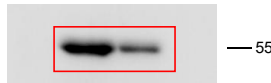

SKP2

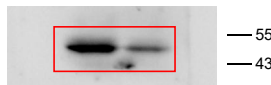

FN1

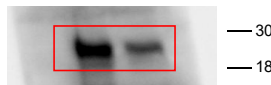

ZEB1

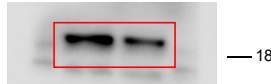

TUBULIN

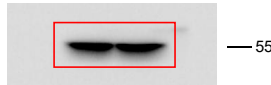

Figure.2I

RNF112

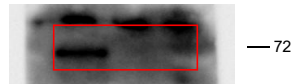

CKS1

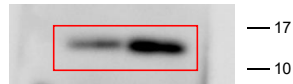

CCNB1

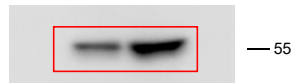

SKP2

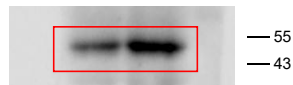

FN1

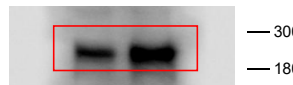

ZEB1

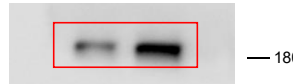

TUBULIN

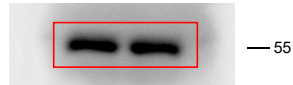

# Unedited blot and gel

Full unedited gels for Figure. 3

Figure.3D

FOXM1

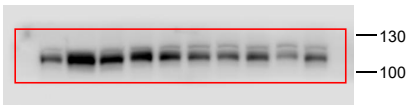

RNF112

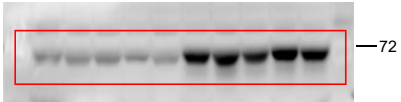

GAPDH

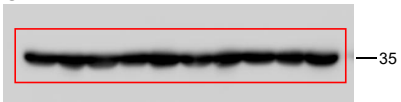

# Unedited blot and gel

Full unedited gels for Figure. 4

## Figure.4A

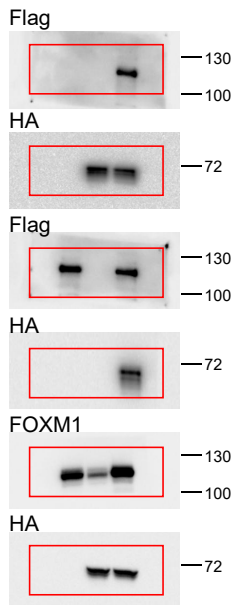

## Figure.4B

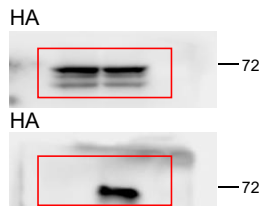

## Figure.4F

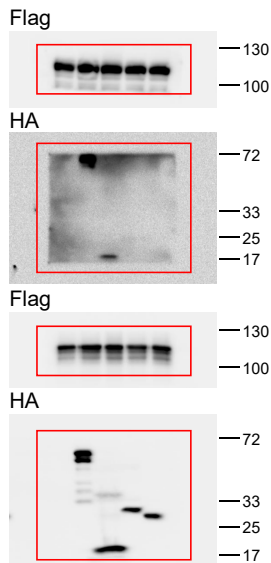

## Figure.4G

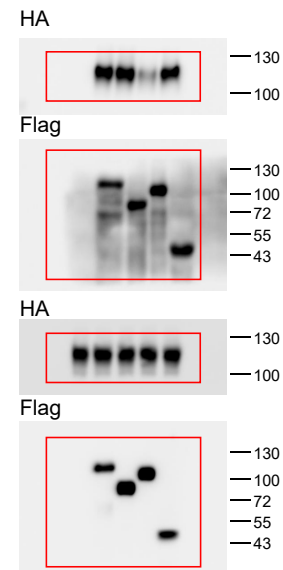

## Figure.4H

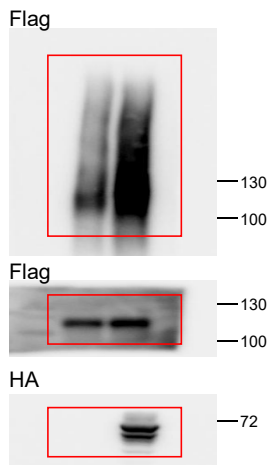

# Unedited blot and gel

Full unedited gels for Figure. 5

## Figure.5B

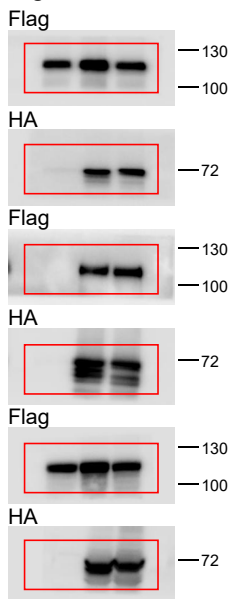

## Figure.5C

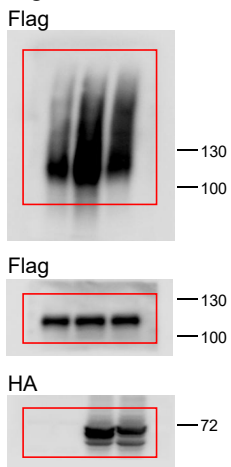

## Figure.5D

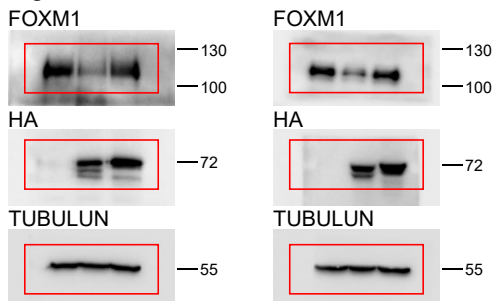

# Unedited blot and gel

Full unedited gels for Figure. 6

## Figure.6A

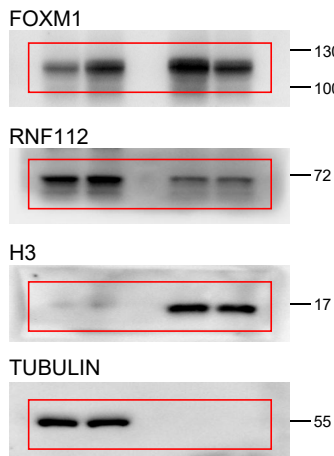

## Figure.6B

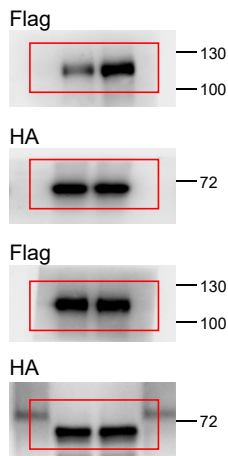

## Figure.6C

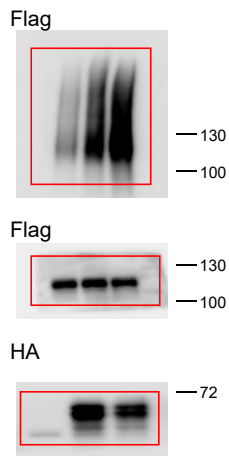

## Figure.6E

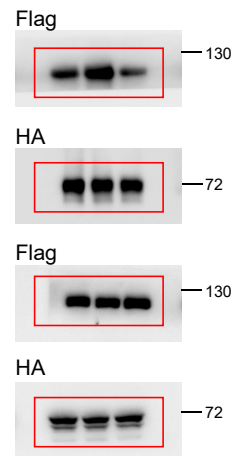

## Figure.6F

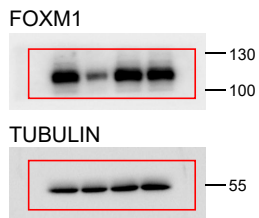

# Unedited blot and gel

Full unedited gels for Figure. 7

Figure.7A

FOXM1

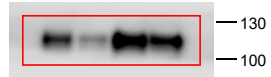

RNF112

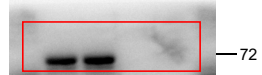

TUBULIN

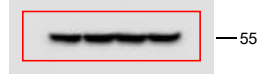

# Unedited blot and gel

Full unedited gels for Supplemental Figure. 2

Supplemental Figure. 2

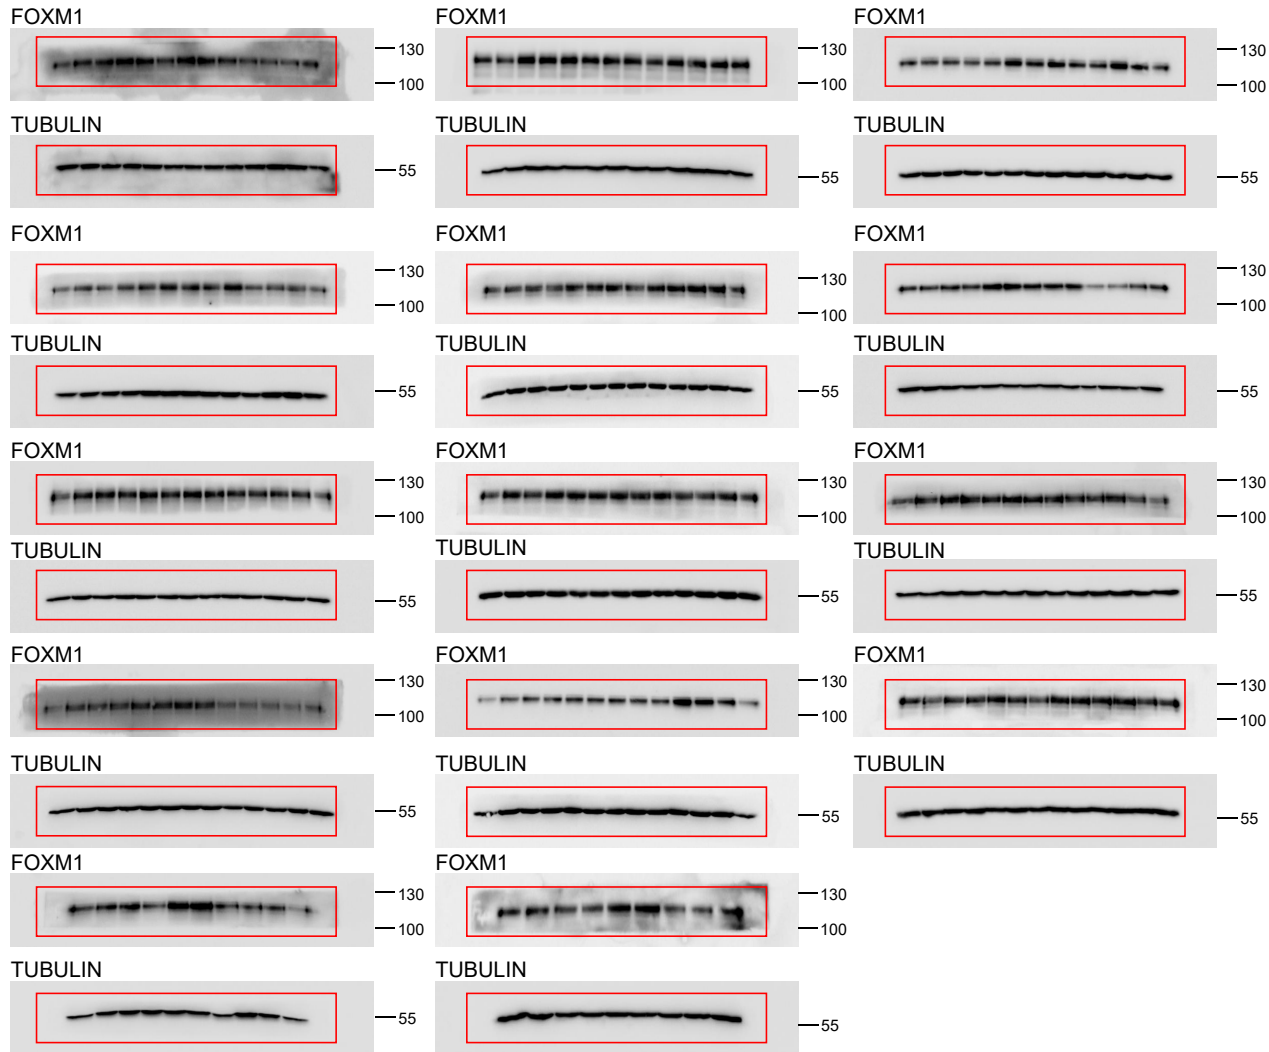

# Unedited blot and gel

Full unedited gels for Supplemental Figure. 5

Supplemental Figure. 5C

FOXM1

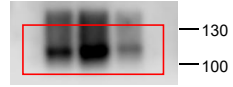

RNF112

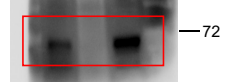

TUBULIN

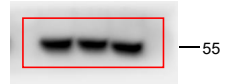



# Unedited blot and gel

Full unedited gels for Supplemental Figure. 6

Supplemental Figure. 6C

Supplemental Figure. 6F

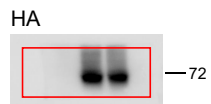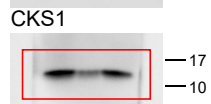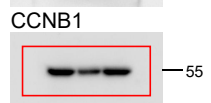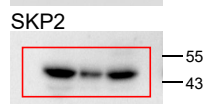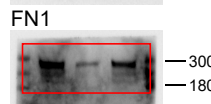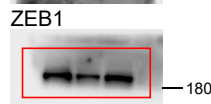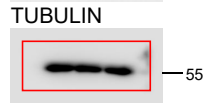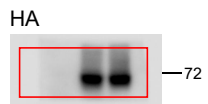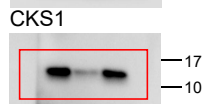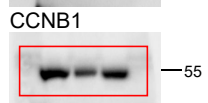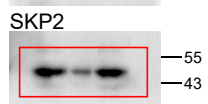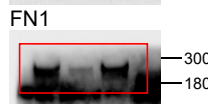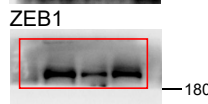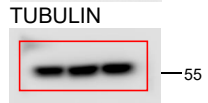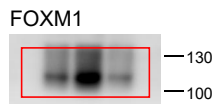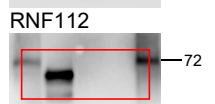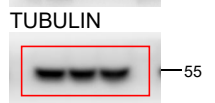

# Unedited blot and gel

Full unedited gels for Supplemental Figure. 7

Supplemental Figure. 7D

FOXM1

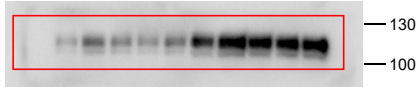

RNF112

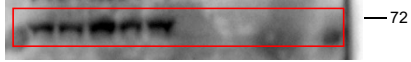

GAPDH

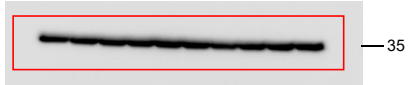

# Unedited blot and gel

Full unedited gels for Supplemental Figure. 10

Supplemental Figure. 10A

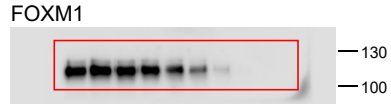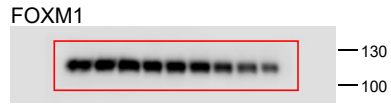

Supplemental Figure. 10B

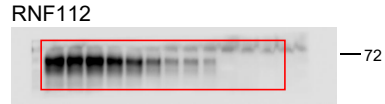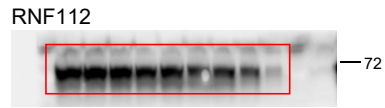

# Unedited blot and gel

Full unedited gels for Supplemental Figure. 11

Supplemental Figure. 11B

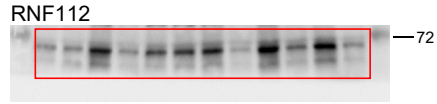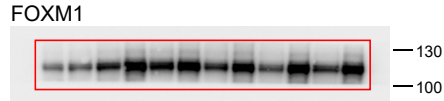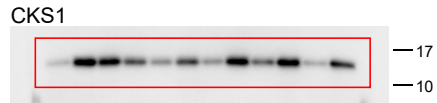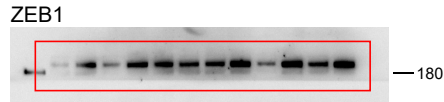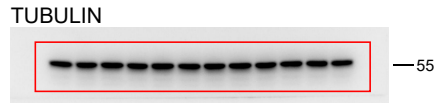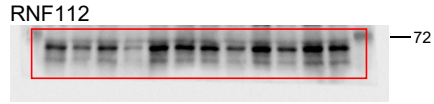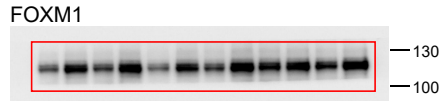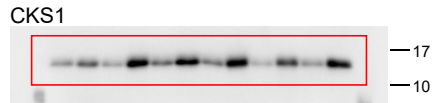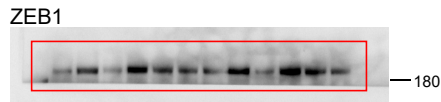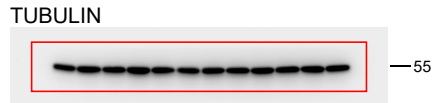

Supplement: jciinsight-8-166698-s270.pdf [file jciinsight-8-166698-s270.pdf]
